# Supplementary material for: Extended cavity pyrene-based iptycenes for the turn-off fluorescence detection of RDX and common nitroaromatic explosives
Source: Royal Society of Chemistry journal article supplement (doi:10.1039/c6nj02956f), 2017-01-01
Supplement: c6nj02956f1.pdf [file c6nj02956f1.pdf]

## Electronic Supplementary Information

### Extended cavity pyrene-based iptycenes for the turn-off fluorescence detection of RDX and common nitroaromatic explosives

Albert F. Khasanov,<sup>a</sup> Dmitry S. Kopchuk,<sup>a, b</sup> Igor S. Kovalev,<sup>a</sup> Olga S. Taniya,<sup>a</sup> Kousik Giri,<sup>c</sup> Pavel A. Slepukhin,<sup>a, b</sup>  
Sougata Santra,<sup>\*a</sup> Matiur Rahman,<sup>a</sup> Adinath Majee,<sup>d</sup> Valery N. Charushin<sup>a, b</sup> and Oleg N. Chupakhin<sup>a, b</sup>

<sup>a</sup> Department of Organic and Biomolecular Chemistry, Chemical Engineering Institute, Ural Federal University, 19 Mira Street, Yekaterinburg, K-2, 620002, Russian Federation. Email: sougatasantra85@gmail.com; ssantra@urfu.ru

<sup>b</sup> I. Ya. Postovskiy Institute of Organic Synthesis, Ural Division of the Russian Academy of Sciences, 22 S. Kovalevskoy Str., Yekaterinburg, 620219, Russian Federation

<sup>c</sup> Centre for Computational Sciences, School of Basic and Applied Sciences, Central University of Punjab, City Campus, Mansa Road, Bathinda-151001, India

<sup>d</sup> Department of Chemistry, Visva-Bharati (A Central University), Santiniketan-731235, India.

#### Table of Contents

|                                                                                    |     |
|------------------------------------------------------------------------------------|-----|
| Chemical structures of fluorophores ( <b>2,3,4a,4b,4c</b> )                        | S3  |
| Iptycene <b>2</b>                                                                  | S4  |
| Fluorescence excitation and emission spectrum of compound <b>2</b>                 | S5  |
| Fluorescence quenching with nitrobenzene (NB) in THF                               | S5  |
| Fluorescence quenching with 2, 4-dinitrotoluene (2,4-DNT) in THF                   | S6  |
| Fluorescence quenching with 2,4,6-trinitrotoluene (TNT) in THF                     | S7  |
| Estimation of the detection limit for sensor <b>2</b>                              | S7  |
| PLQY                                                                               | S8  |
| Iptycene <b>3</b>                                                                  | S8  |
| Fluorescence quenching with 2, 4-dinitrotoluene (2,4-DNT) in THF                   | S10 |
| Fluorescence quenching with 2,4,6-trinitrotoluene in THF                           | S11 |
| Fluorescence quenching with 2,4,6-trinitrophenole (TNP or picric acid (PA)) in THF | S12 |
| Fluorescence quenching with nitrobenzene (NB) in THF                               | S13 |
| Estimation of the detection limit for sensor <b>3</b>                              | S14 |
| PLQY                                                                               | S14 |
| Compound <b>4a</b>                                                                 | S15 |
| Fluorescence quenching with 2, 4-dinitrotoluene (2,4-DNT) in THF                   | S17 |
| Fluorescence quenching with 2,4,6-trinitrotoluene (TNT) in THF                     | S19 |
| Fluorescence quenching with 2,4,6-trinitrophenole (TNP or picric acid (PA)) in THF | S21 |
| Fluorescence quenching with nitrobenzene (NB) in THF                               | S23 |

## Electronic Supplementary Information

|                                                                                                                                         |     |
|-----------------------------------------------------------------------------------------------------------------------------------------|-----|
| Fluorescence quenching with RDX in THF                                                                                                  | S24 |
| Estimation of the detection limit for sensor <b>4a</b>                                                                                  | S26 |
| PLQY                                                                                                                                    | S27 |
| Compound <b>4b</b>                                                                                                                      | S28 |
| Fluorescence quenching with 2, 4-dinitrotoluene (2,4-DNT) in THF                                                                        | S29 |
| Fluorescence quenching with 2, 4-dinitrotoluene (2,4-DNT) in toluene                                                                    | S30 |
| Fluorescence quenching with 2,4,6-trinitrotoluene (TNT) in THF                                                                          | S31 |
| Fluorescence quenching with 2,4,6-trinitrophenole (TNP or picric acid (PA)) in THF                                                      | S33 |
| Fluorescence quenching with (TNP or picric acid (PA)) in toluene                                                                        | S34 |
| Estimation of the detection limit for sensor <b>4b</b>                                                                                  | S35 |
| PLQY                                                                                                                                    | S36 |
| Compound <b>4c</b>                                                                                                                      | 37  |
| Fluorescence quenching with 2, 4-dinitrotoluene (2,4-DNT) in THF                                                                        | S38 |
| Fluorescence quenching with 2,4,6-trinitrotoluene in THF                                                                                | S39 |
| Fluorescence quenching with 2,4,6-trinitrophenole (TNP or picric acid (PA)) in THF                                                      | S41 |
| Estimation of the detection limit for sensor <b>4c</b>                                                                                  | S42 |
| PLQY                                                                                                                                    | S43 |
| Estimation of the detection limit presented in terms of the fluorescence quenching efficiency (%) after addition of TNT for all sensors | S44 |
| Fluorescence quenching with benzoquinone in THF                                                                                         | S45 |
| The detection of lifetime of <b>4a</b> fluorophore at different mole ratios of TNT and RDX                                              | S46 |
| Fluorescence quenching in polymer matrices                                                                                              | S64 |
| <sup>1</sup> H & <sup>13</sup> C NMR data for iptycenes <b>2,3,4a,4b,4c</b>                                                             | S65 |
| X-Ray data for the iptycene <b>3</b>                                                                                                    | S75 |
| References                                                                                                                              | S93 |

**Chemical structures of fluorophores (2,3,4a,4b,4c)**

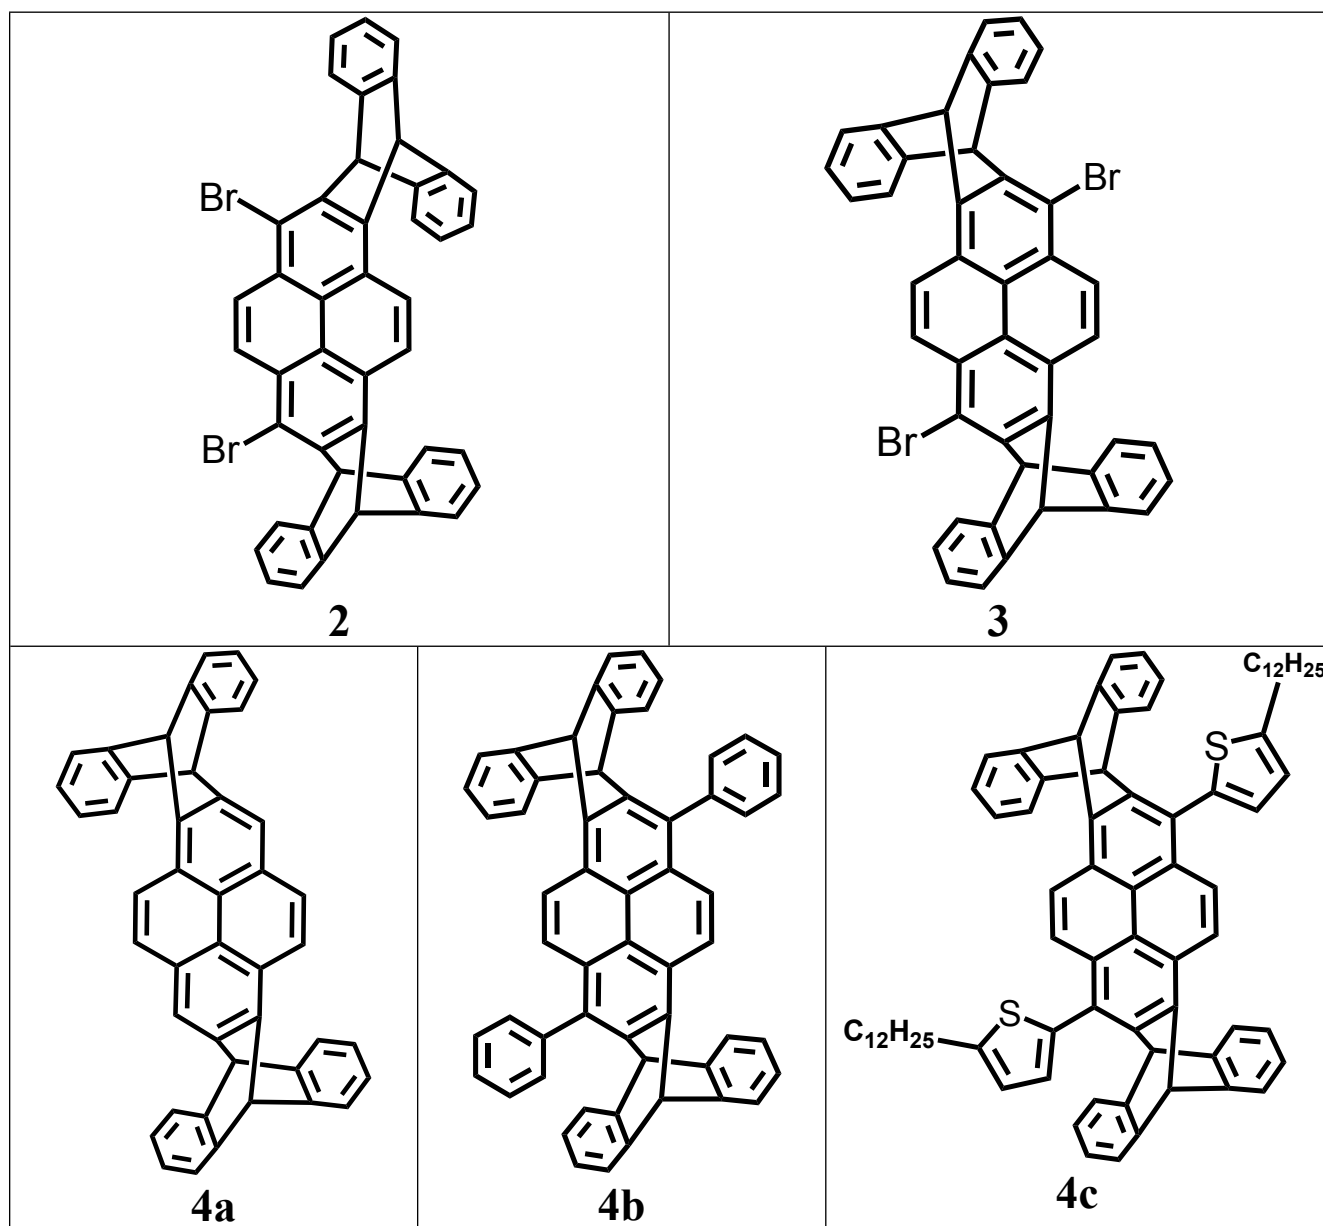

**Fig. S1** Chemical structures of fluorophores (2,3,4a,4b,4c)

## Electronic Supplementary Information

### Fluorescence titration experiments

Experiments were carried out by using the Horiba-Fluoromax-4. Solutions of fluorophores were prepared by dissolving the sample in THF.

In a typical titration experiment 1 mL of the solution of sensors ( $10^{-6}$  M) were placed in a quartz cell, followed by adding there to 10 aliquots of 0.1 molar equivalent of each analyte (NACs).

The fluorescence emission spectra were measured (298 K) under  $\lambda_{\text{ex}} = 375$  nm. The fluorescent quenching experiments were carried out by means of the titration of solutions ( $10^{-6}$  M) of sensors.

There were no changes in the shape of the emission spectrum by gradually putting the initial fluorescence emission during titration nitroaromatic quencher.

Analysis of fluorescence emission intensity ( $(I_0/I)-1$ ), as a function of the concentration of the quencher ( $[Q]$ ) describes a Stern-Volmer equation

$$I_0/I = 1 + K_{\text{sv}} [Q].$$

The binding constant was calculated as the slope of the graph.

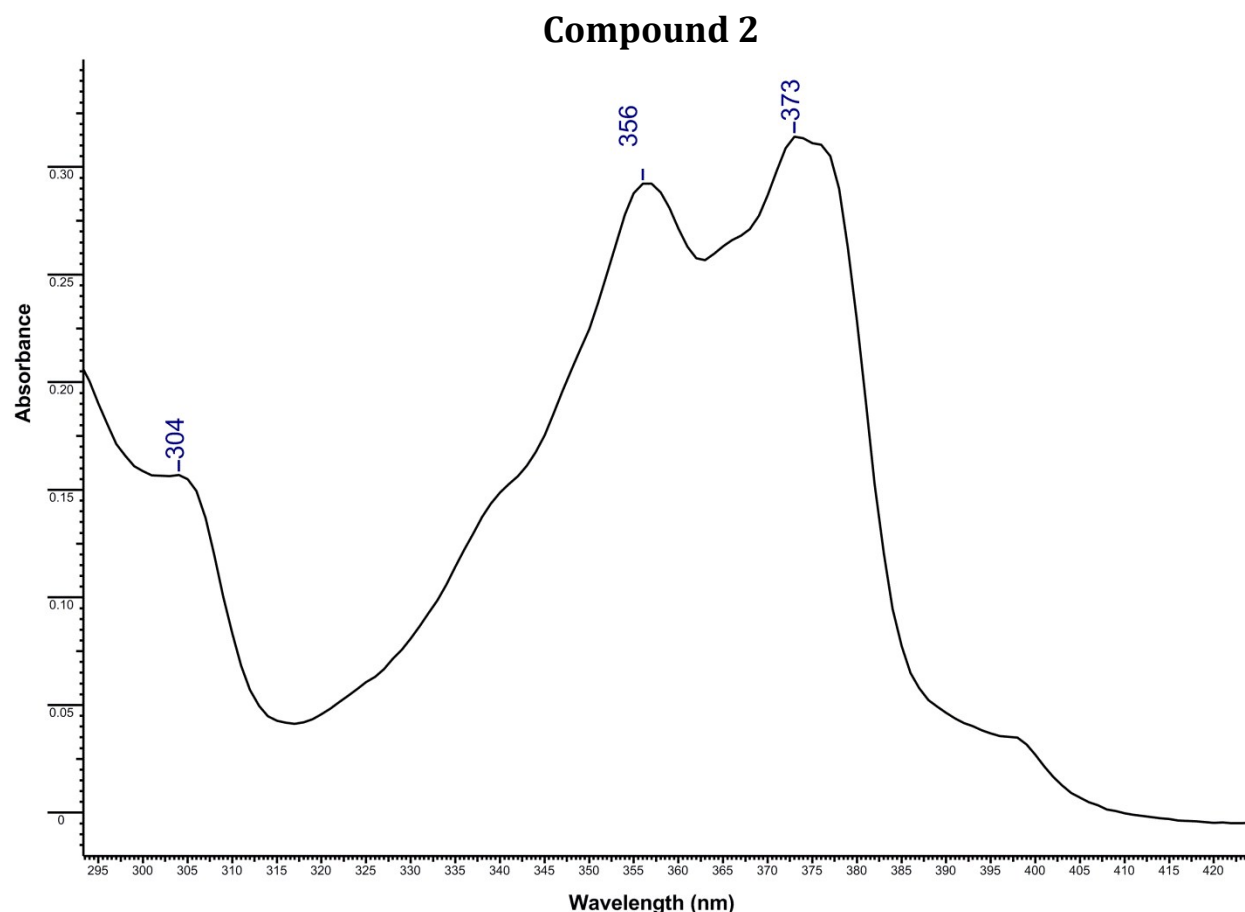

**Fig. S2** Electronic absorption spectrum of compound 2

## Electronic Supplementary Information

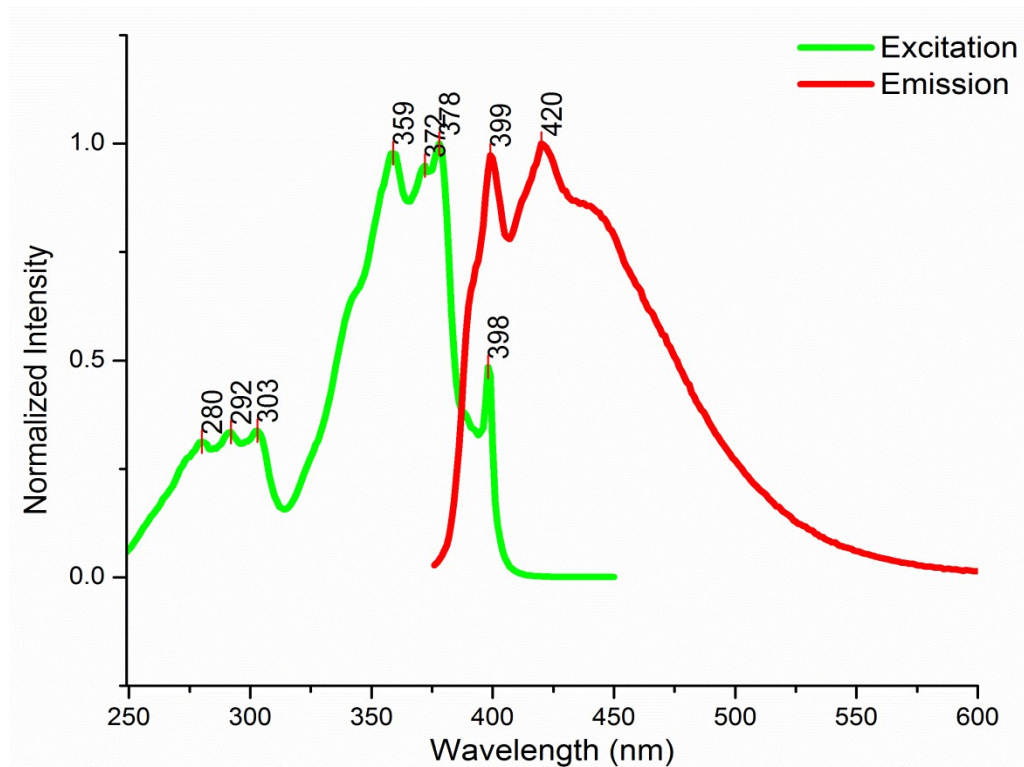

**Fig. S3** Fluorescence excitation and emission spectrum of compound **2**

### Fluorescence quenching with nitrobenzene (NB) in THF

The fluorescence quenching of the fluorophore **2** ( $1.0 \times 10^{-5}$  M) with nitrobenzene ( $2.0 \times 10^{-2}$  M) was carried out in THF.

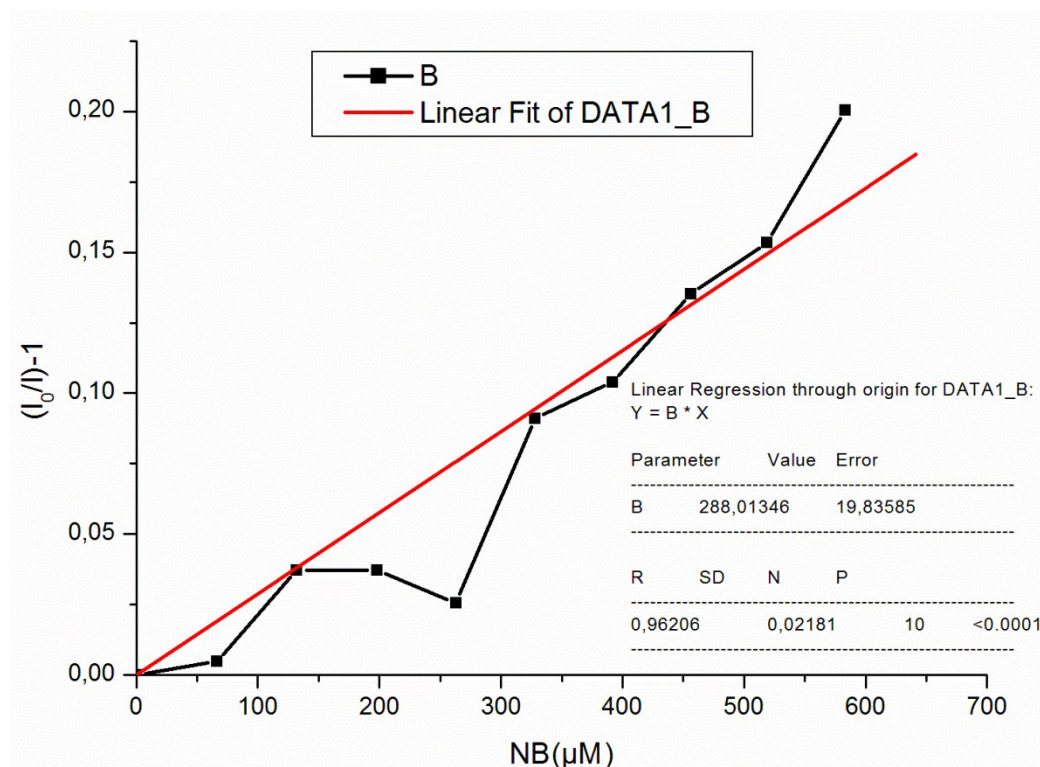

**Fig.S4** Stern-Volmer plot

## Electronic Supplementary Information

### Fluorescence quenching with 2,4-dinitrotoluene (DNT) in THF

The fluorescence quenching of the fluorophore **2** ( $1.0 \times 10^{-5}$  M) with 2,4-dinitrotoluene ( $2.0 \times 10^{-2}$  M) was carried out in THF.

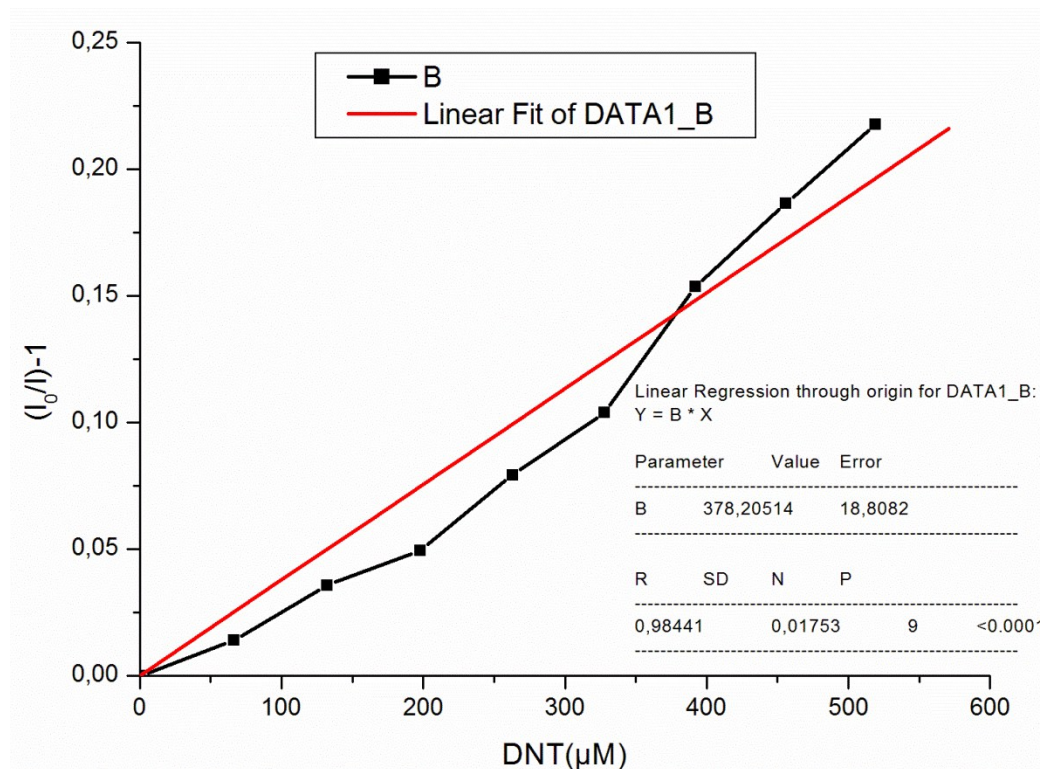

**Fig.S5** Stern-Volmer plot

## Electronic Supplementary Information

### Fluorescence quenching with trinitrotoluene (TNT) in THF

The fluorescence quenching of the fluorophore **2** ( $1.0 \times 10^{-5}$  M) with trinitrotoluene ( $2.0 \times 10^{-2}$  M) was carried out in THF.

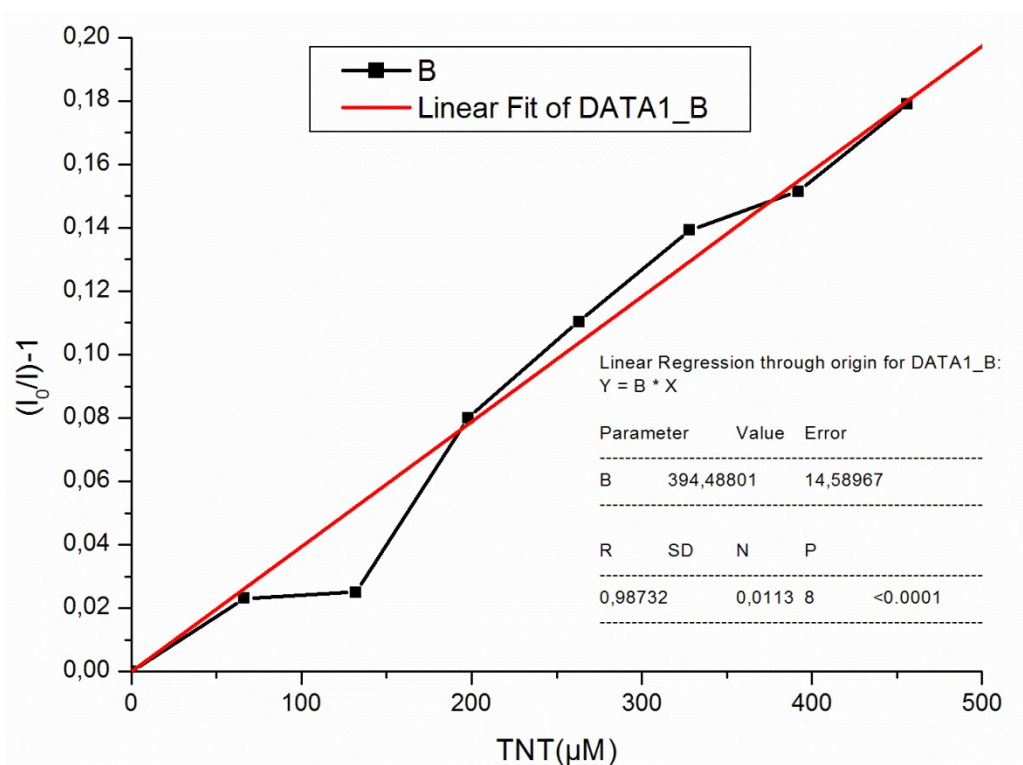

Fig.S6 Stern-Volmer plot

### Estimation of the detection limit for sensor 2

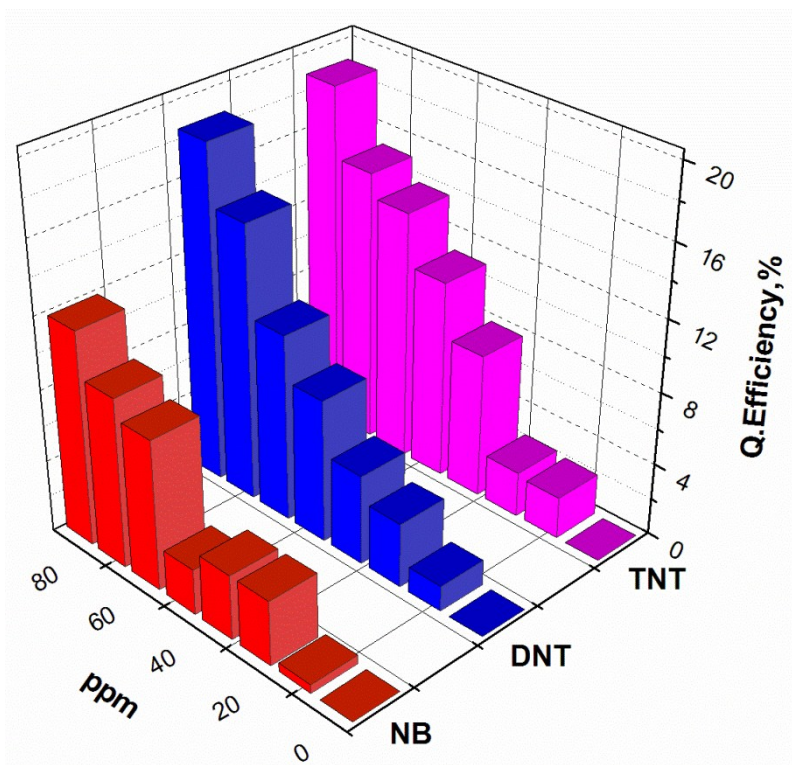

Fig.S7. Estimation of the detection limit for sensor 2

## PLQY

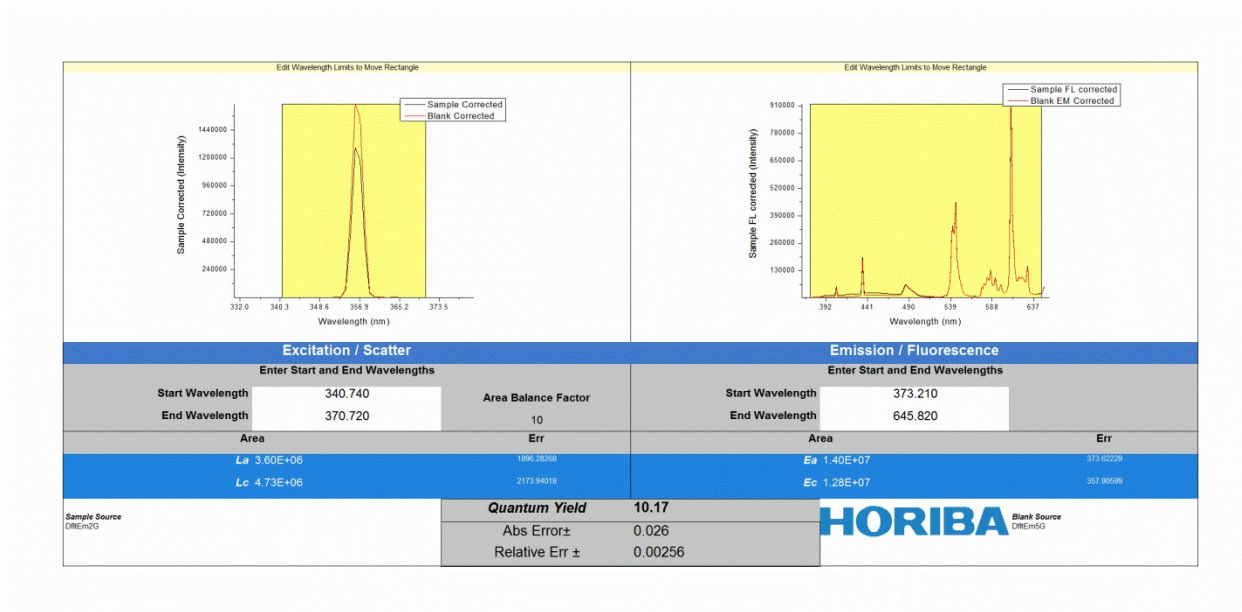

|            | <b>Ksv (R) in THF</b> |
|------------|-----------------------|
| <b>NB</b>  | 288 (R=0.9621)        |
| <b>DNT</b> | 378 (R=0.9844)        |
| <b>TNT</b> | 394 (R=0.9873)        |

## Compound 3

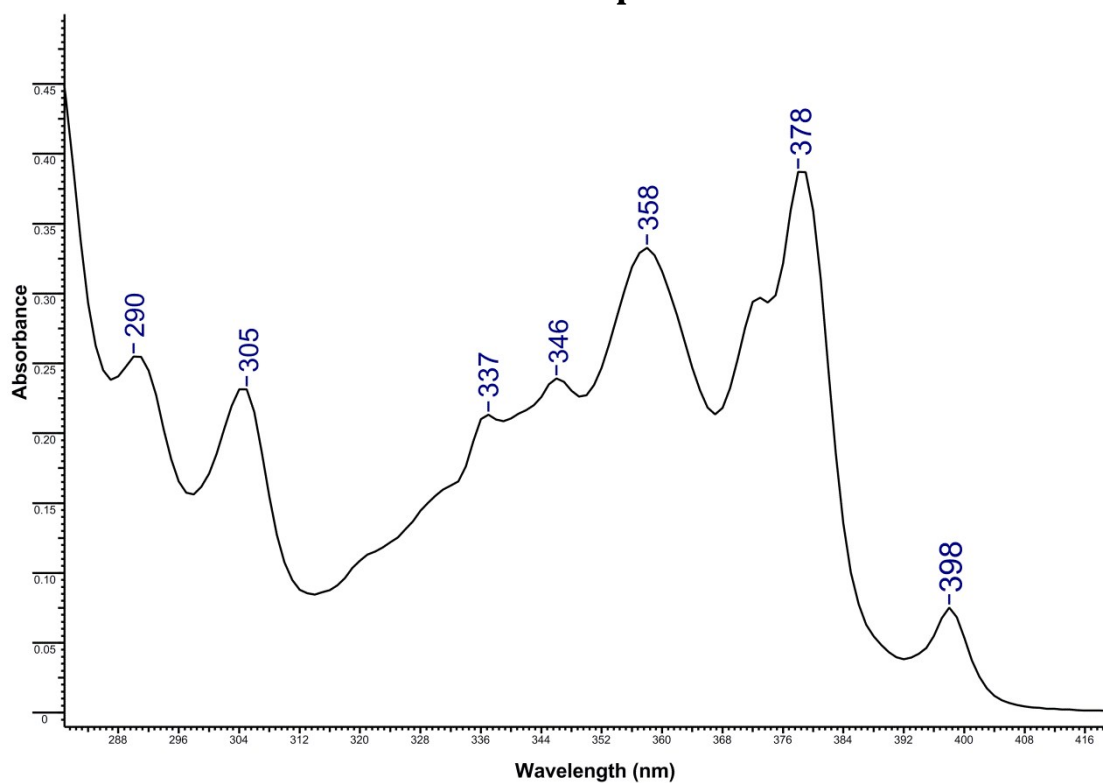

Fig.S8 Electronic absorption spectrum of compound 3



## Electronic Supplementary Information

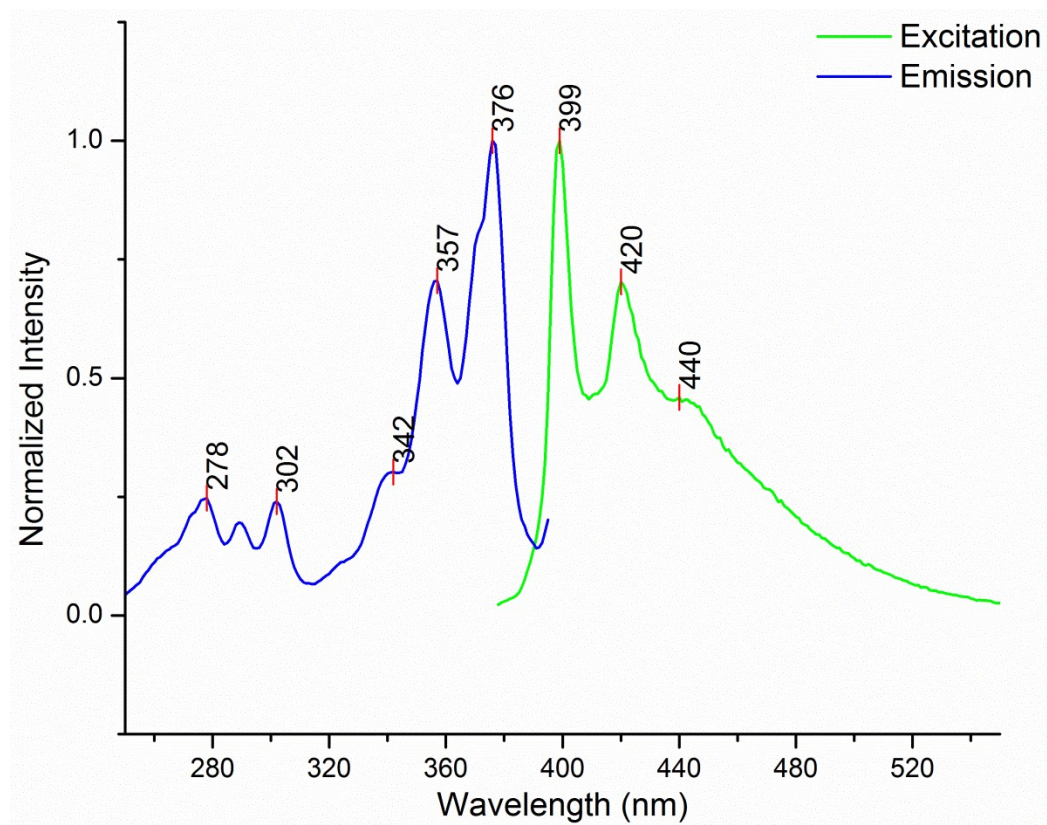

**Fig.S9** Fluorescence excitation and emission spectrum of compound **3**

## Electronic Supplementary Information

### Fluorescence quenching with 2, 4-dinitrotoluene in THF

The fluorescence quenching of the fluorophore **3** ( $1.0 \times 10^{-5}$  M) with 2, 4-dinitrotoluene ( $2.0 \times 10^{-3}$  M) was carried out in THF.

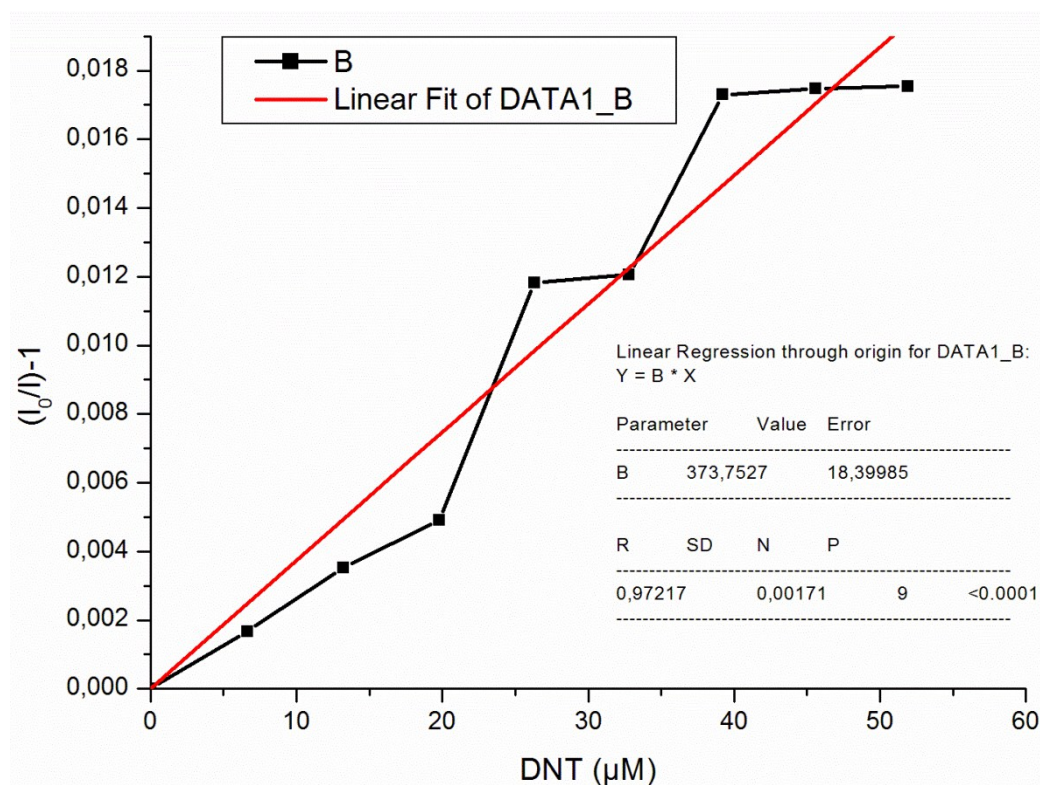

**Fig.S10** Stern-Volmer plot

| 2,4-DNT ( $\mu\text{M}$ ) | $(I_0/I)-1$ |
|---------------------------|-------------|
| 0,00E+00                  | 0,00000     |
| 6,64E+00                  | 0,00168     |
| 1,32E+01                  | 0,00352     |
| 1,98E+01                  | 0,00491     |
| 2,63E+01                  | 0,01183     |
| 3,28E+01                  | 0,01207     |
| 3,92E+01                  | 0,01730     |
| 4,56E+01                  | 0,01747     |
| 5,19E+01                  | 0,01754     |

**Fig.S11** Fluorescence quenching of the fluorophore **3** with DNT in THF

**Fluorescence quenching with trinitrotoluene in THF**

The fluorescence quenching of the fluorophore **3** ( $1.0 \times 10^{-5}$  M) with trinitrotoluene ( $2.0 \times 10^{-3}$  M) was carried out in THF.

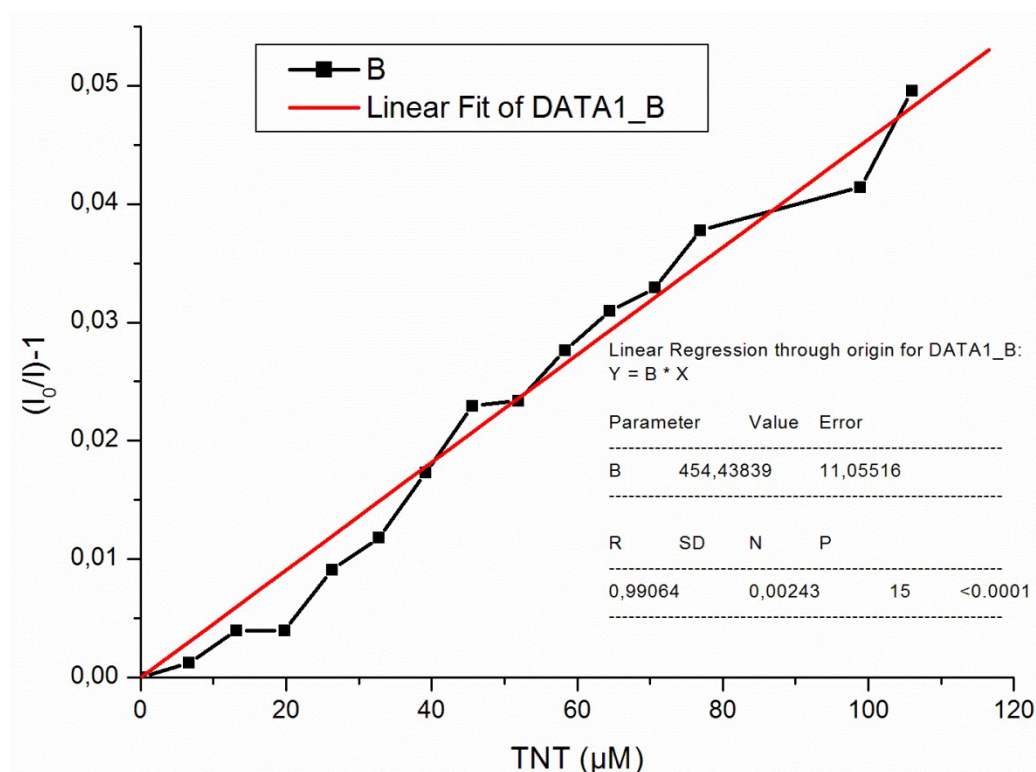**Fig.S12** Stern-Volmer plot

| TNT ( $\mu$ M) | $(I_0/I)-1$ |
|----------------|-------------|
| 0,00E+00       | 0,00000     |
| 6,64E+00       | 0,00124     |
| 1,32E+01       | 0,00398     |
| 1,98E+01       | 0,00398     |
| 2,63E+01       | 0,00911     |
| 3,28E+01       | 0,01179     |
| 3,92E+01       | 0,01730     |
| 4,56E+01       | 0,02296     |
| 5,19E+01       | 0,02337     |
| 5,83E+01       | 0,02765     |
| 6,45E+01       | 0,03093     |
| 7,07E+01       | 0,03291     |

**Fig.S13** Fluorescence quenching of the fluorophore **3** with TNT in THF

## Electronic Supplementary Information

### Fluorescence quenching with picric acid in THF

The fluorescence quenching of the fluorophore **3** ( $1.0 \times 10^{-5}$  M) with picric acid ( $2.0 \times 10^{-3}$  M) was carried out in THF.

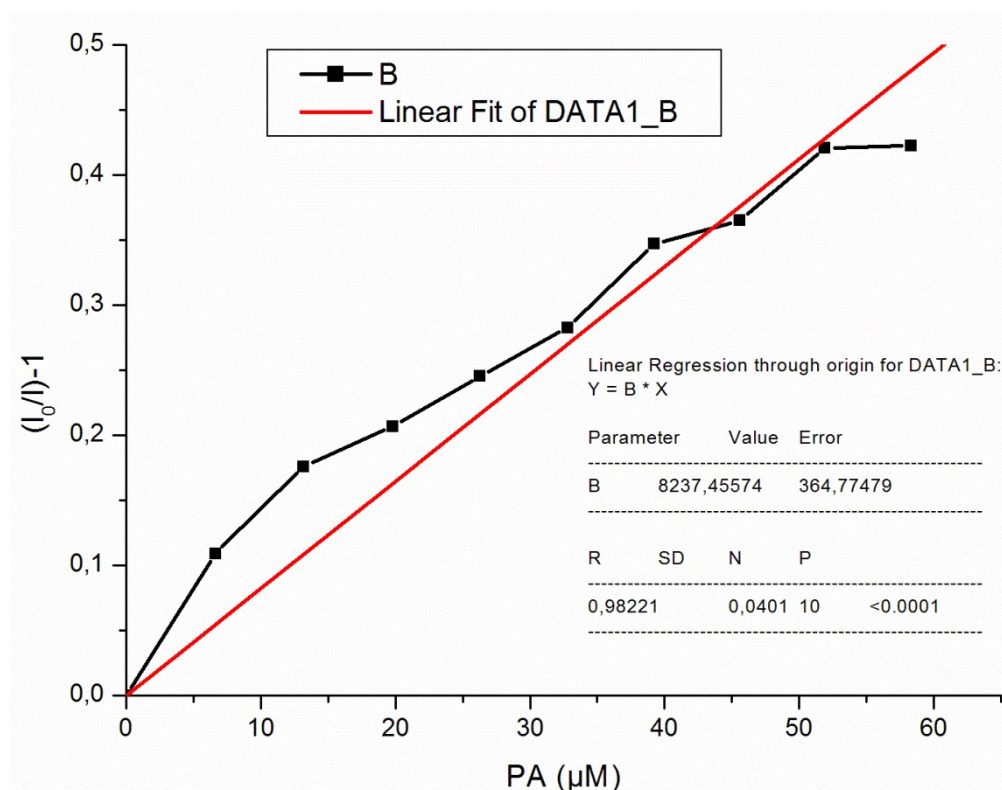

**Fig.S14** Stern-Volmer plot

| TNP(PA)<br>( $\mu$ M) | $(I_0/I)-1$ |
|-----------------------|-------------|
| 0,00E+00              | 0,00000     |
| 6,64E+00              | 0,10917     |
| 1,32E+01              | 0,17614     |
| 1,98E+01              | 0,20689     |
| 2,63E+01              | 0,24524     |
| 3,28E+01              | 0,28265     |
| 3,92E+01              | 0,34692     |
| 4,56E+01              | 0,36497     |
| 5,19E+01              | 0,42041     |

**Fig.S15** Fluorescence quenching of the fluorophore **3** with TNP(PA) in THF

## Electronic Supplementary Information

### Fluorescence quenching with nitrobenzene in THF

The fluorescence quenching of the fluorophore **3** ( $1.0 \times 10^{-5}$  M) with nitrobenzene ( $2.0 \times 10^{-2}$  M) was carried out in THF.

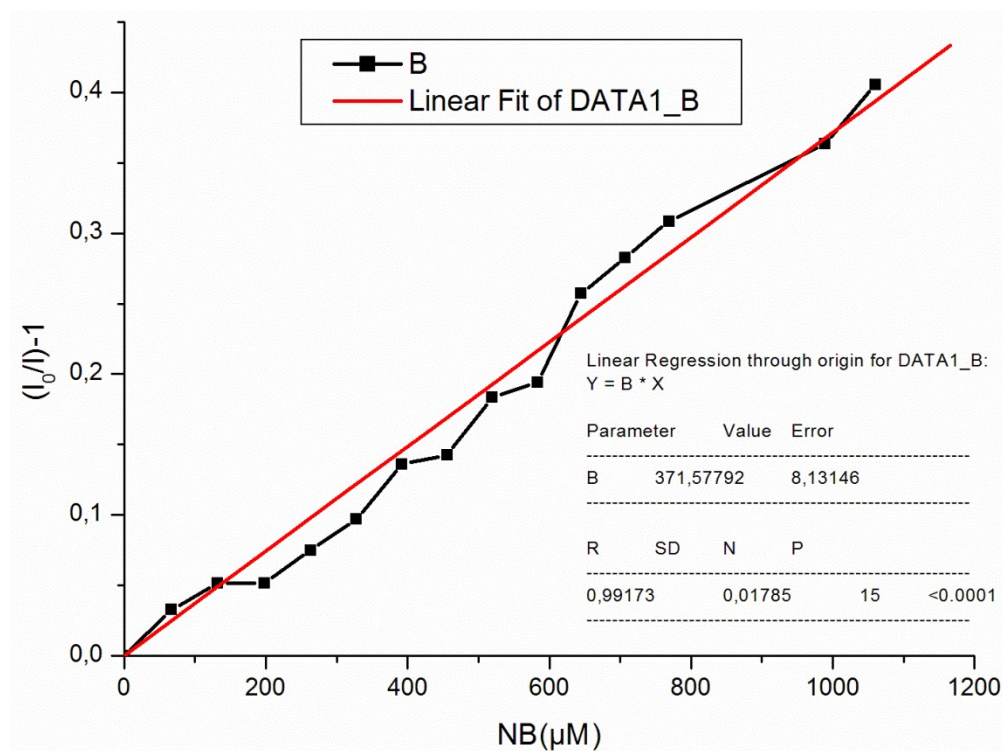

**Fig.S16** Stern-Volmer plot

| NB ( $\mu$ M) | $(I_0/I)-1$ |
|---------------|-------------|
| 0,00E+00      | 0,00000     |
| 6,64E+01      | 0,03290     |
| 1,32E+02      | 0,05177     |
| 1,98E+02      | 0,05177     |
| 2,63E+02      | 0,07520     |
| 3,28E+02      | 0,09695     |
| 3,92E+02      | 0,13618     |
| 4,56E+02      | 0,14262     |
| 5,19E+02      | 0,18358     |
| 5,83E+02      | 0,19416     |
| 6,45E+02      | 0,25716     |
| 7,07E+02      | 0,28274     |

**Fig.S17** Fluorescence quenching of the fluorophore **3** with NB in THF

|                | <b>Ksv (R) in THF</b> |
|----------------|-----------------------|
| <b>NB</b>      | 372 (R=0.9917)        |
| <b>DNT</b>     | 374 (R=0.9722)        |
| <b>TNT</b>     | 454 (R=0.9906)        |
| <b>TNP(PA)</b> | 8237 (R=0.9822)       |

Estimation of the detection limit for sensor 3

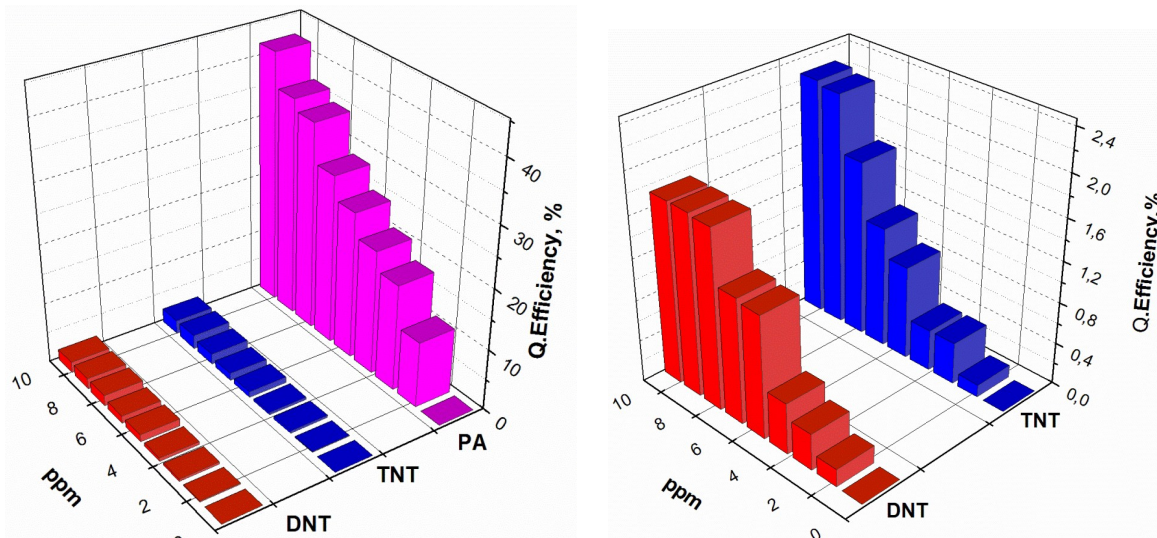

Fig.S18 Estimation of the detection limit for sensor 3

PLQY

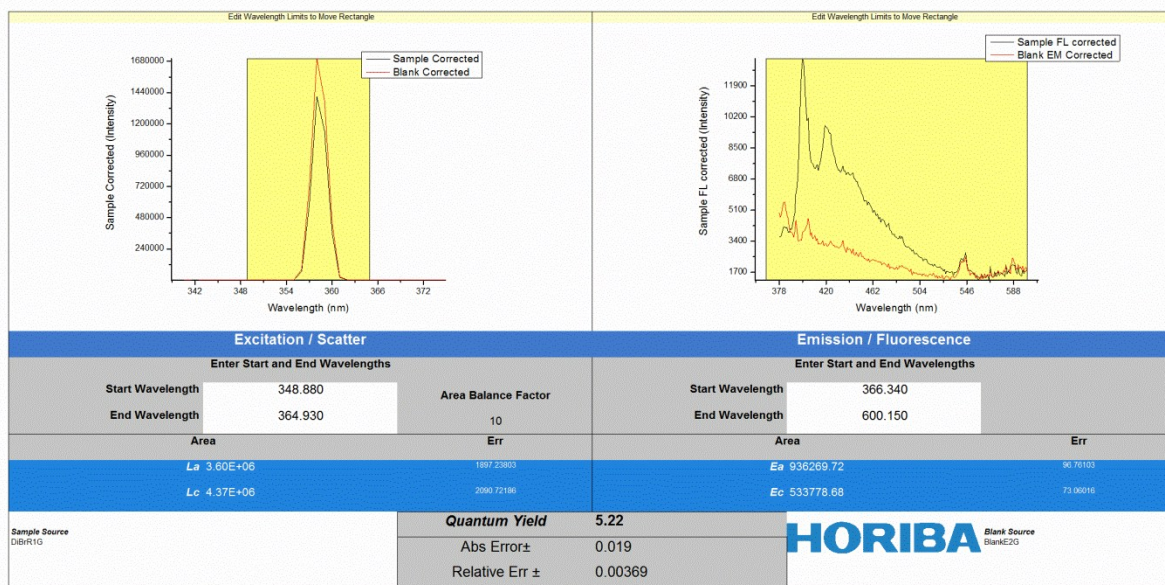

# Electronic Supplementary Information

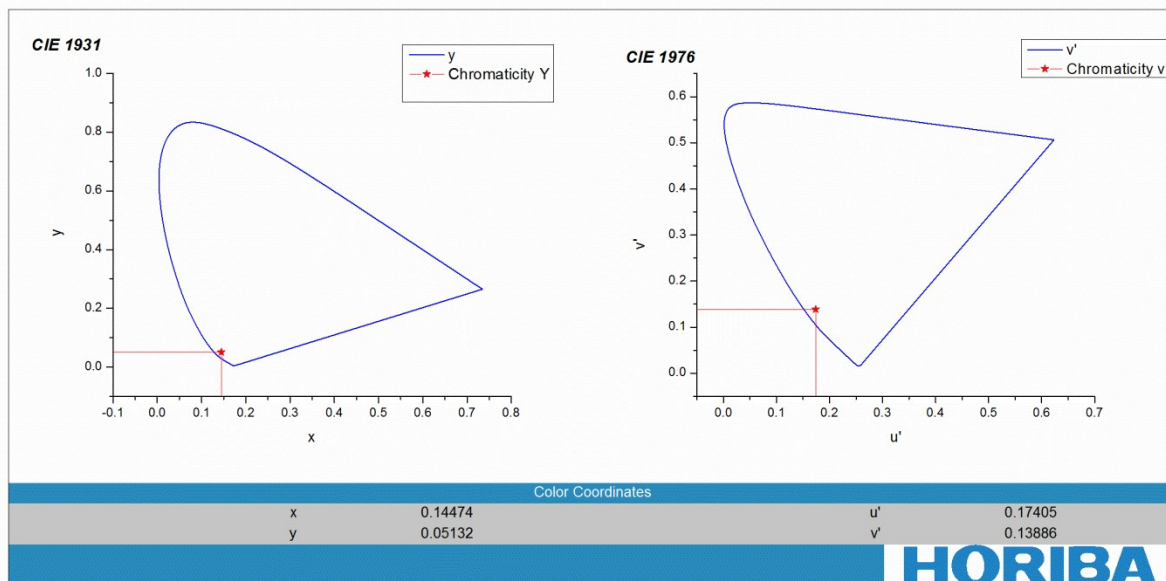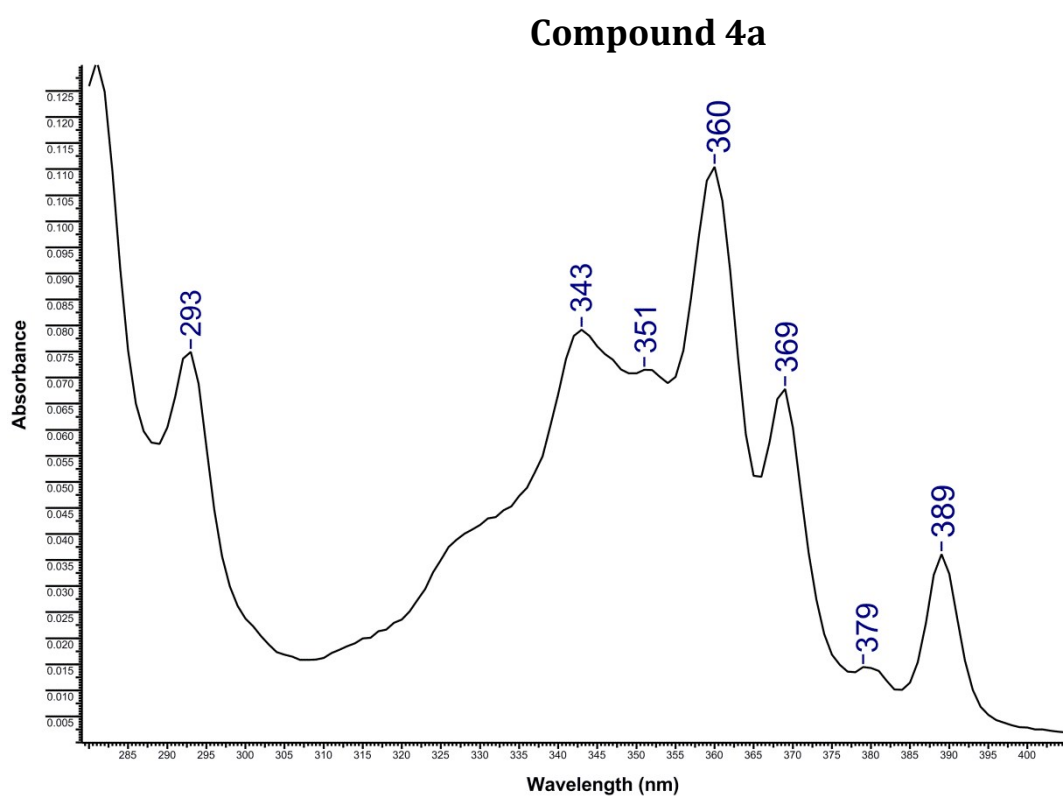

**Fig.S19** Electronic absorption spectrum of compound **4a**

Electronic Supplementary Information

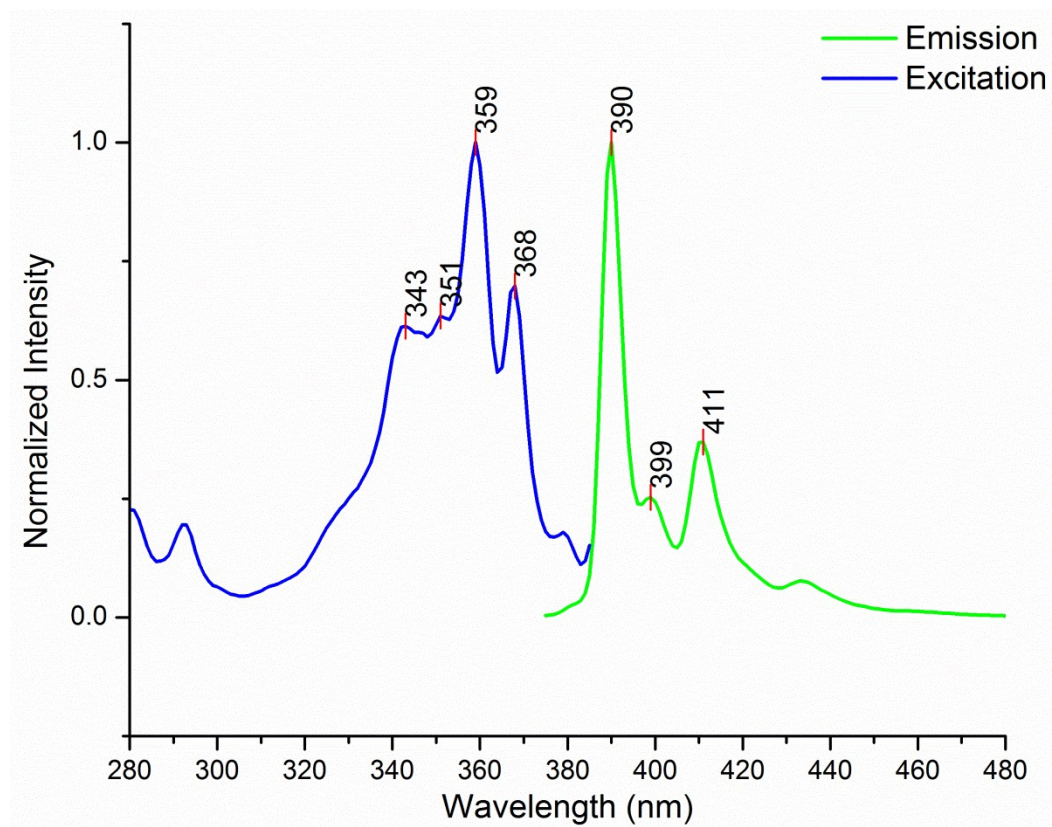

**Fig.S20** Fluorescence excitation and emission spectrum of compound **4a**



## Electronic Supplementary Information

### Fluorescence quenching with 2, 4-dinitrotoluene in THF

The fluorescence quenching of the fluorophore **4a** ( $1.0 \times 10^{-5}$  M) with 2, 4-dinitrotoluene ( $2.0 \times 10^{-3}$  M) was carried out in THF.

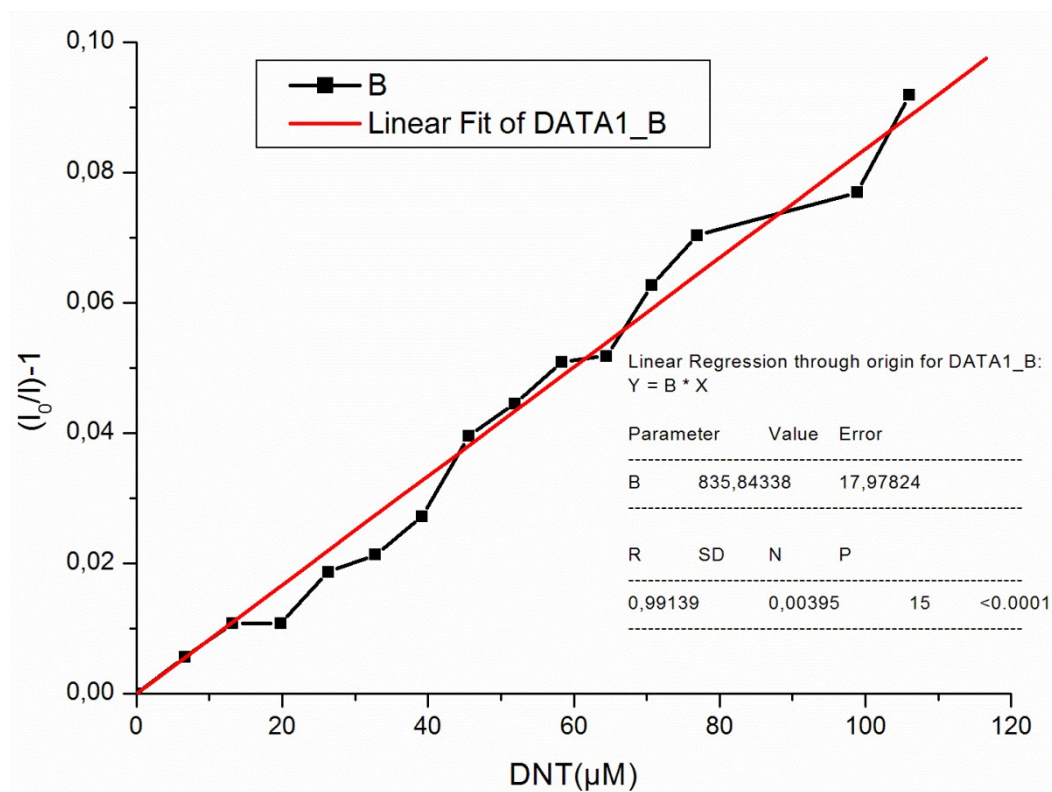

**Fig.S21** Stern-Volmer plot

## Electronic Supplementary Information

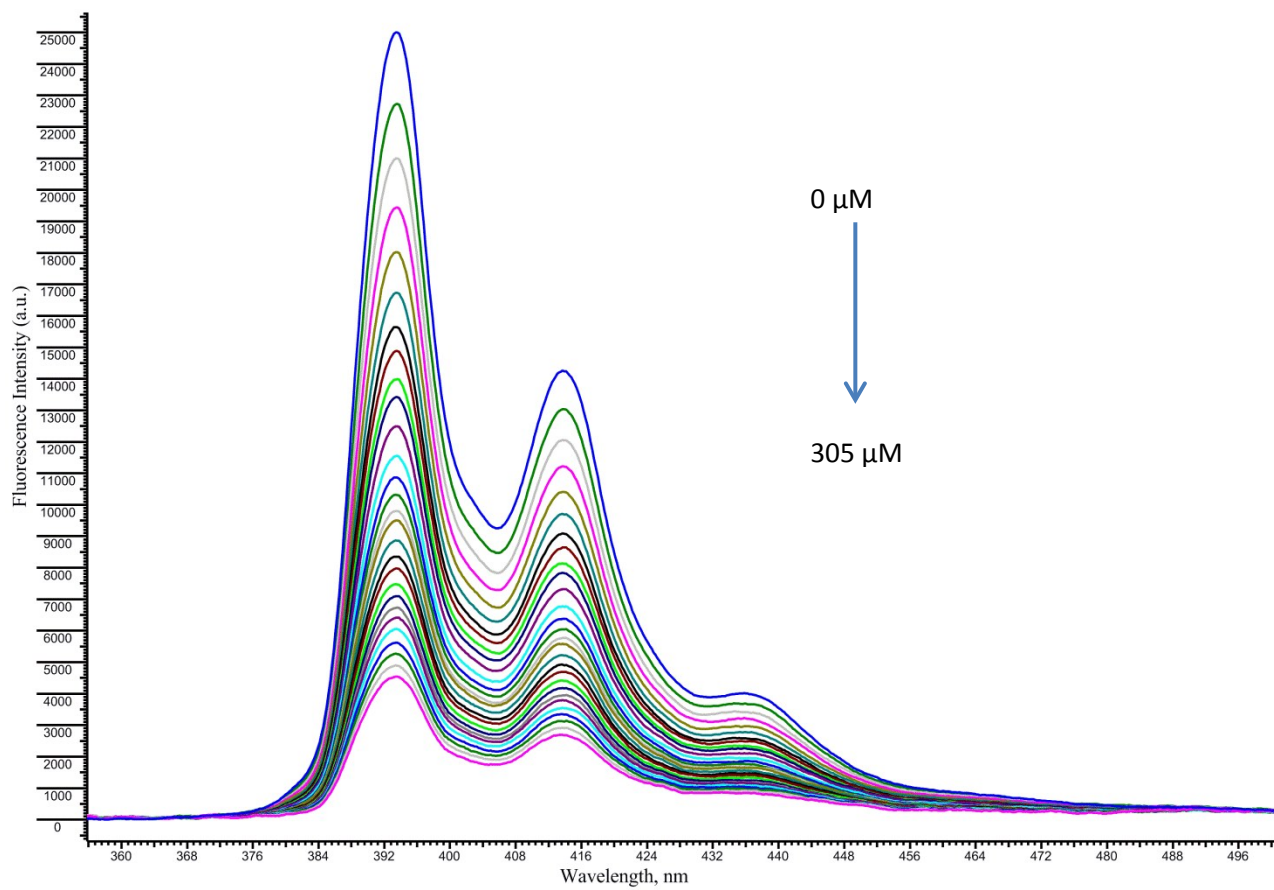

**Fig.S22** Fluorescence quenching of the fluorophore **4a** with DNT in THF

## Electronic Supplementary Information

### Fluorescence quenching with trinitrotoluene in THF

The fluorescence quenching of the fluorophore **4a** ( $1.0 \times 10^{-5}$  M) with trinitrotoluene ( $2.0 \times 10^{-3}$  M) was carried out in THF.

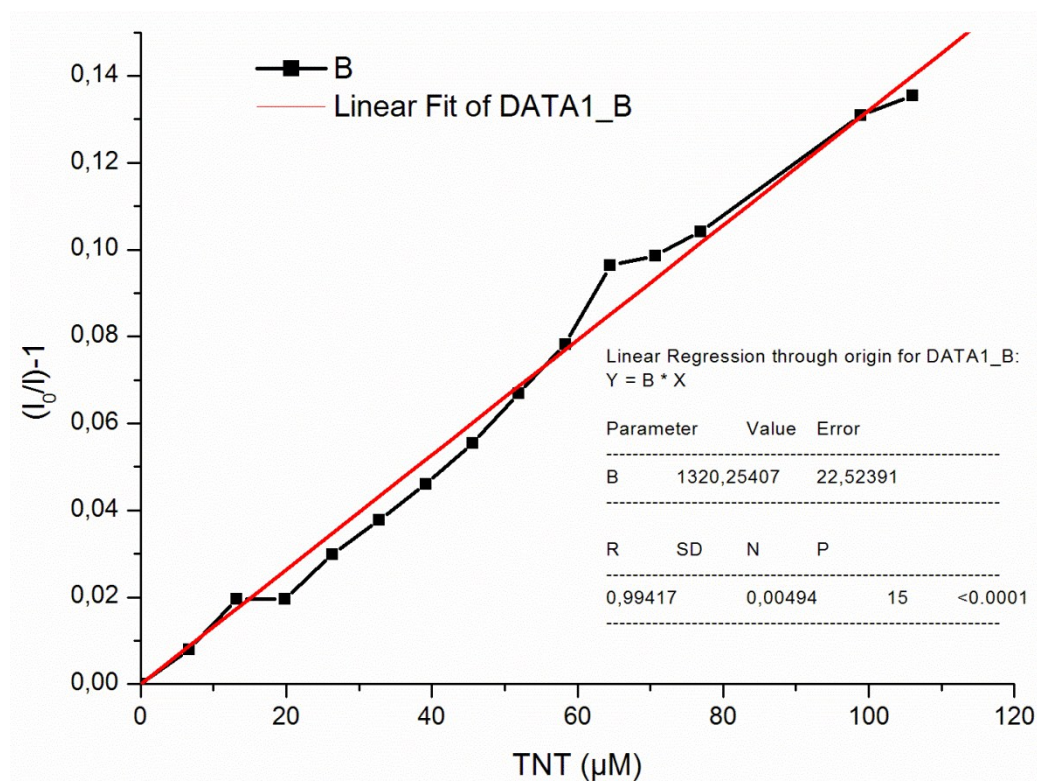

Fig.S23 Stern-Volmer plot

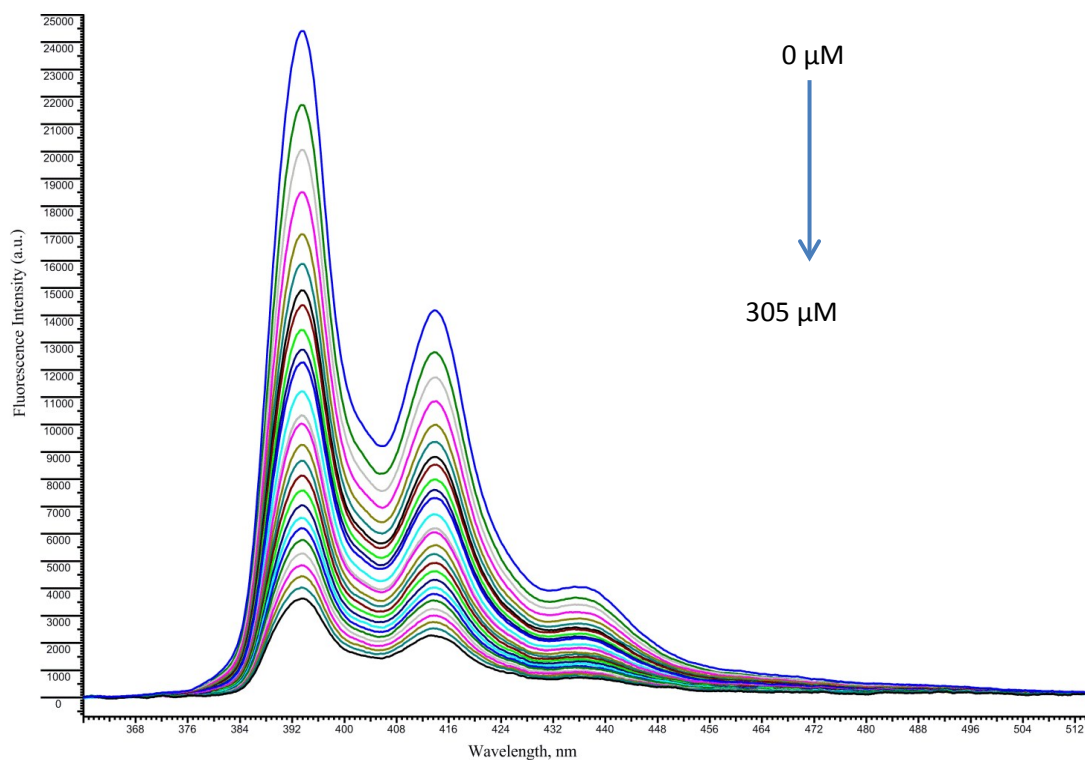

Fig.S24 Fluorescence quenching of the fluorophore **4a** with TNT in THF

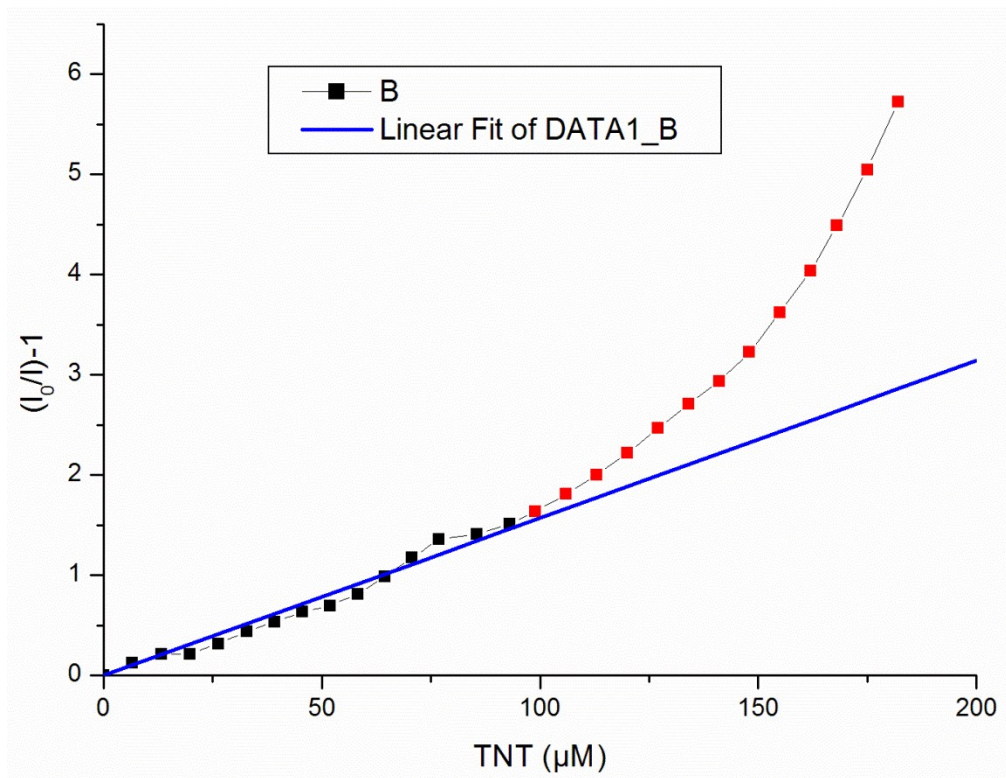

**Fig.S25** Stern-Volmer plot of **4a** sensor at different concentration of TNT (28 points)

## Electronic Supplementary Information

### Fluorescence quenching with 2,4,6-trinitrophenol (picric acid) in THF

The fluorescence quenching of the fluorophore **4a** ( $1.0 \times 10^{-5}$  M) with picric acid ( $2.0 \times 10^{-3}$  M) was carried out in THF.

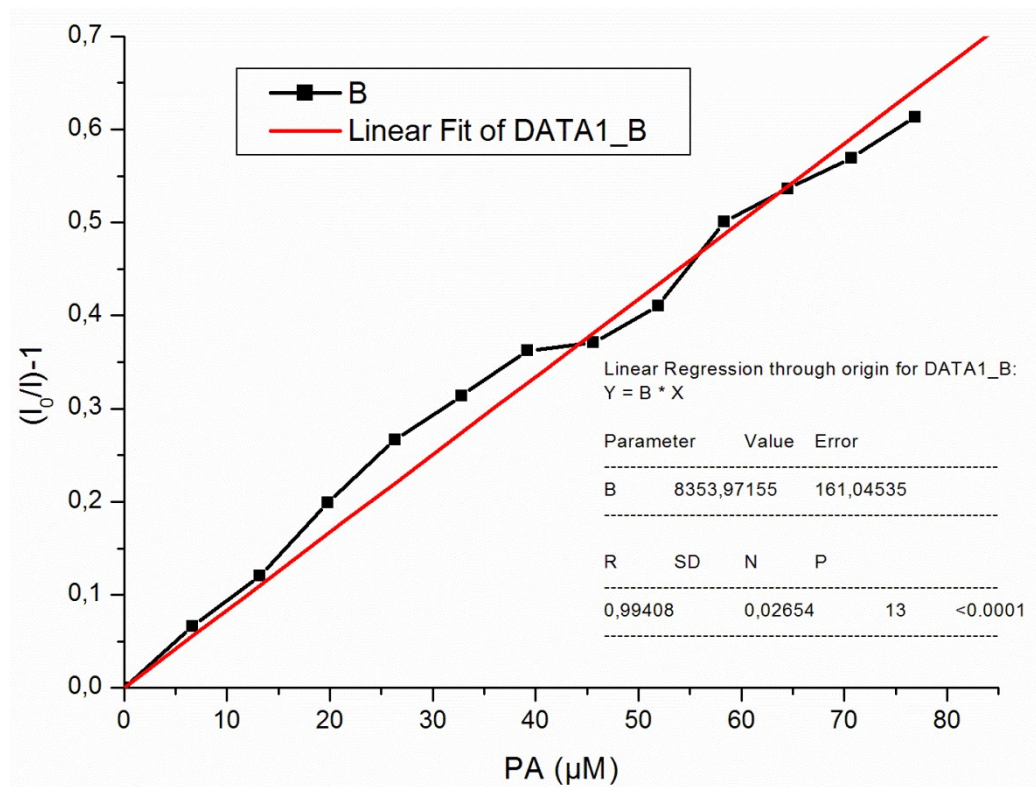

**Fig. S26** Stern-Volmer plot

## Electronic Supplementary Information

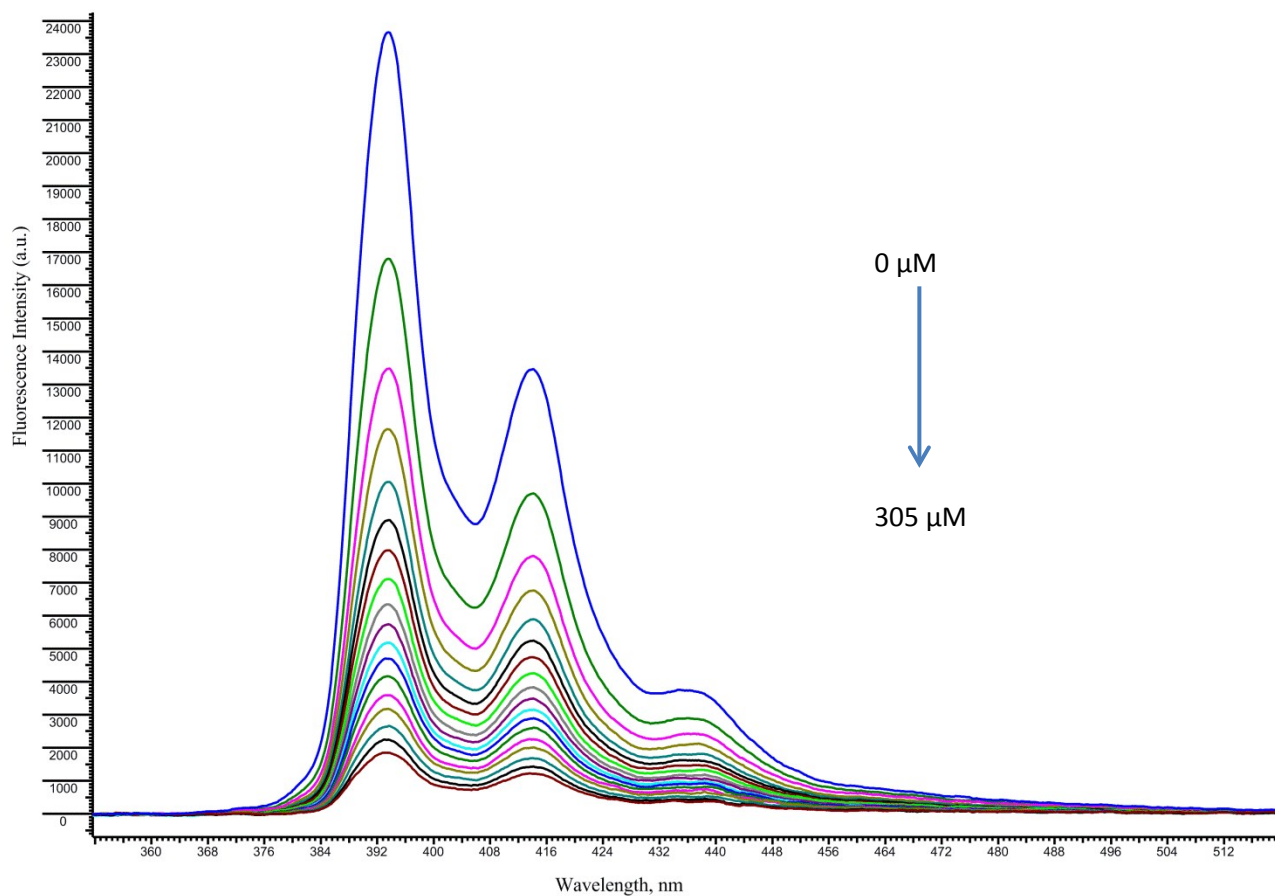

**Fig.S27** Fluorescence quenching of the fluorophore **4a** with TNP(PA) in THF

**Fluorescence quenching with nitrobenzene in THF**

The fluorescence quenching of the fluorophore **4a** ( $1.0 \times 10^{-5}$  M) with nitrobenzene ( $2.0 \times 10^{-2}$  M) was carried out in THF.

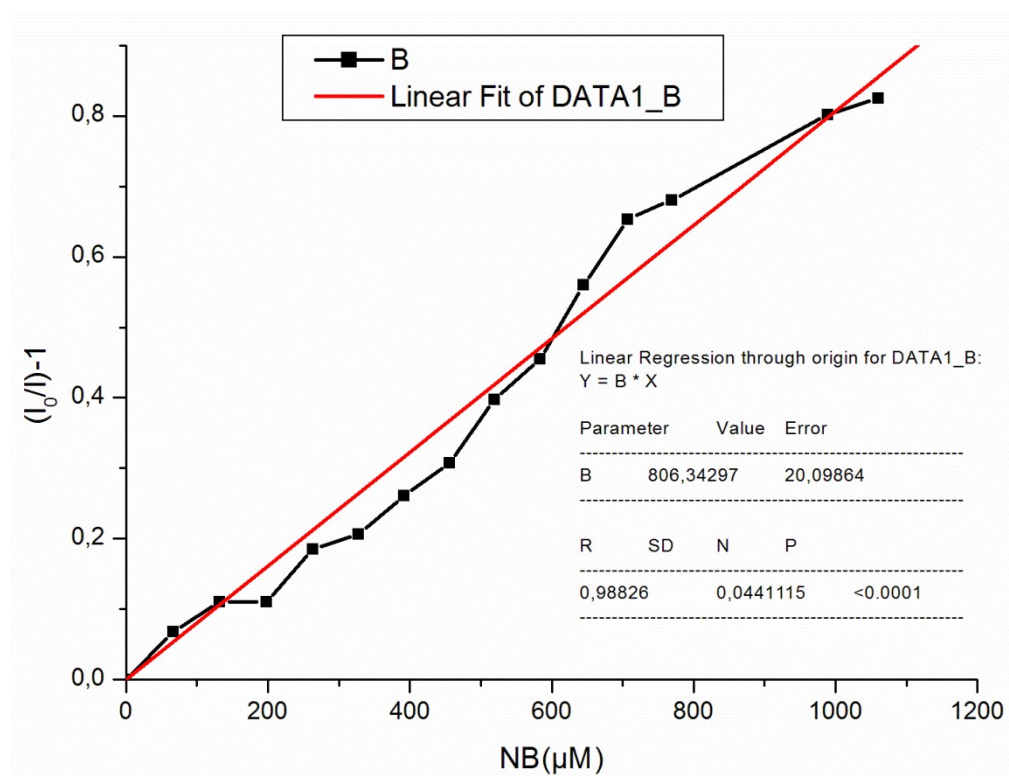

**Fig.S28** Stern-Volmer plot

## Electronic Supplementary Information

### Fluorescence quenching with RDX in THF

The fluorescence quenching of the fluorophore **4a** ( $1.0 \times 10^{-5}$  M) with RDX ( $2.0 \times 10^{-3}$  M) was carried out in THF.

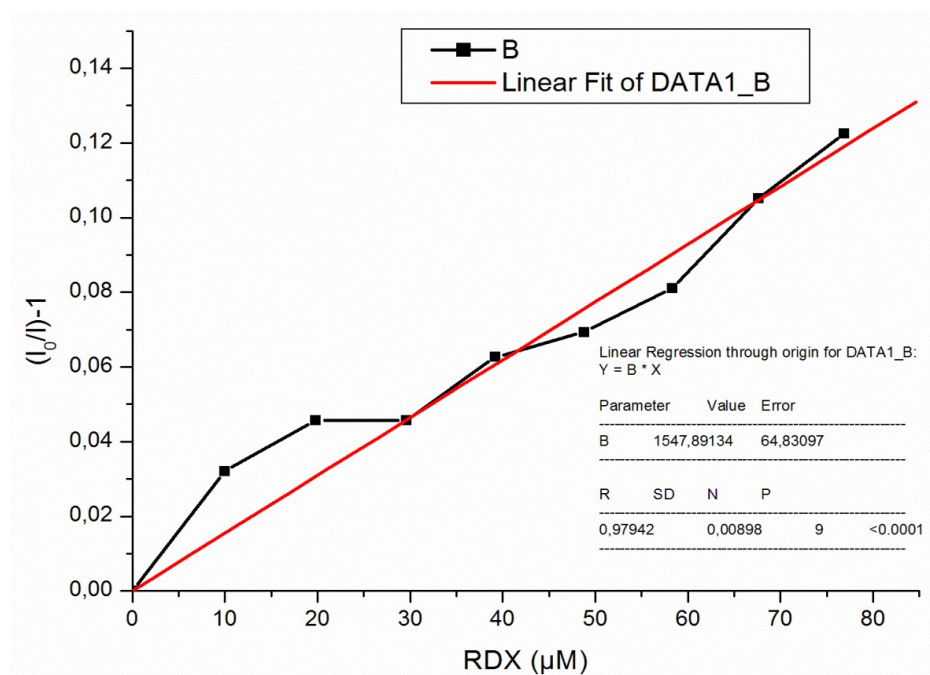

**Fig.S29** Stern-Volmer plot

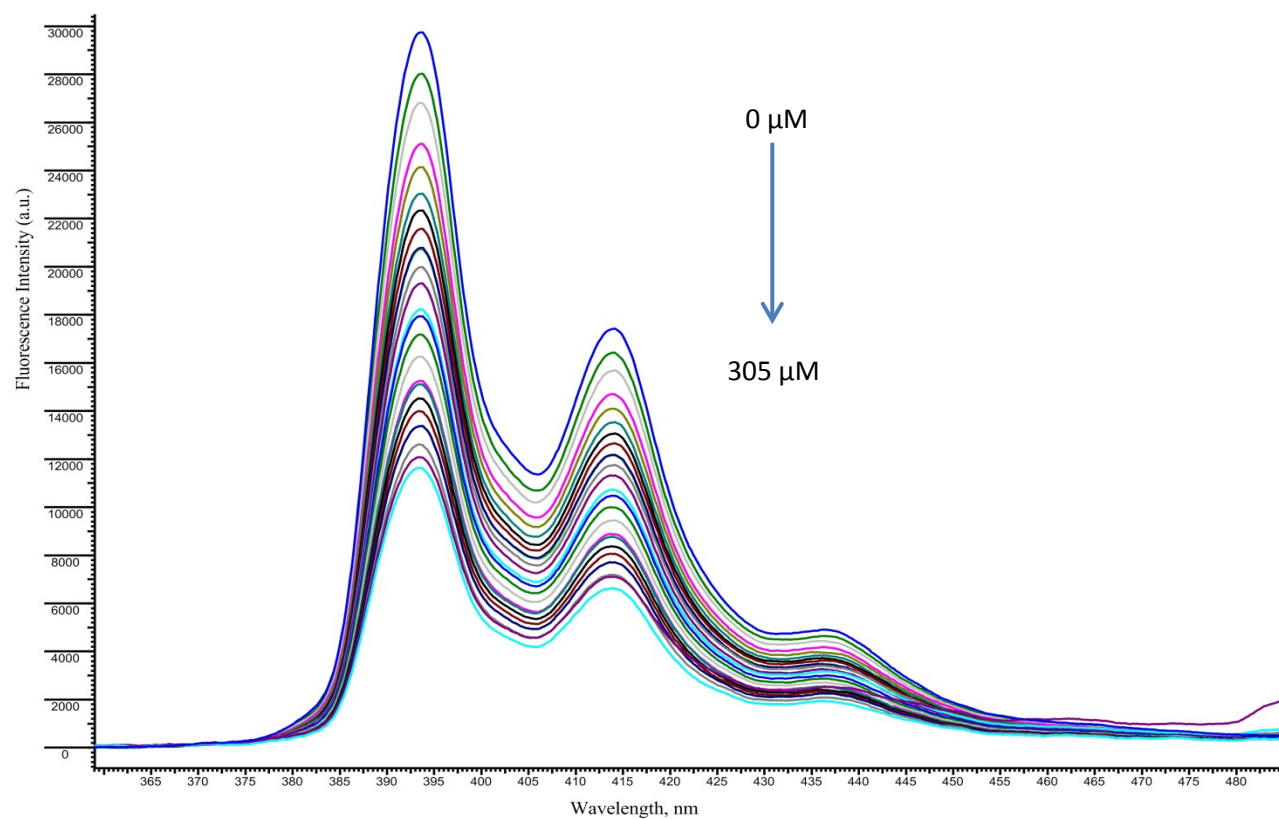

**Fig.S30** Fluorescence quenching of the fluorophore **4a** with RDX in THF



## Electronic Supplementary Information

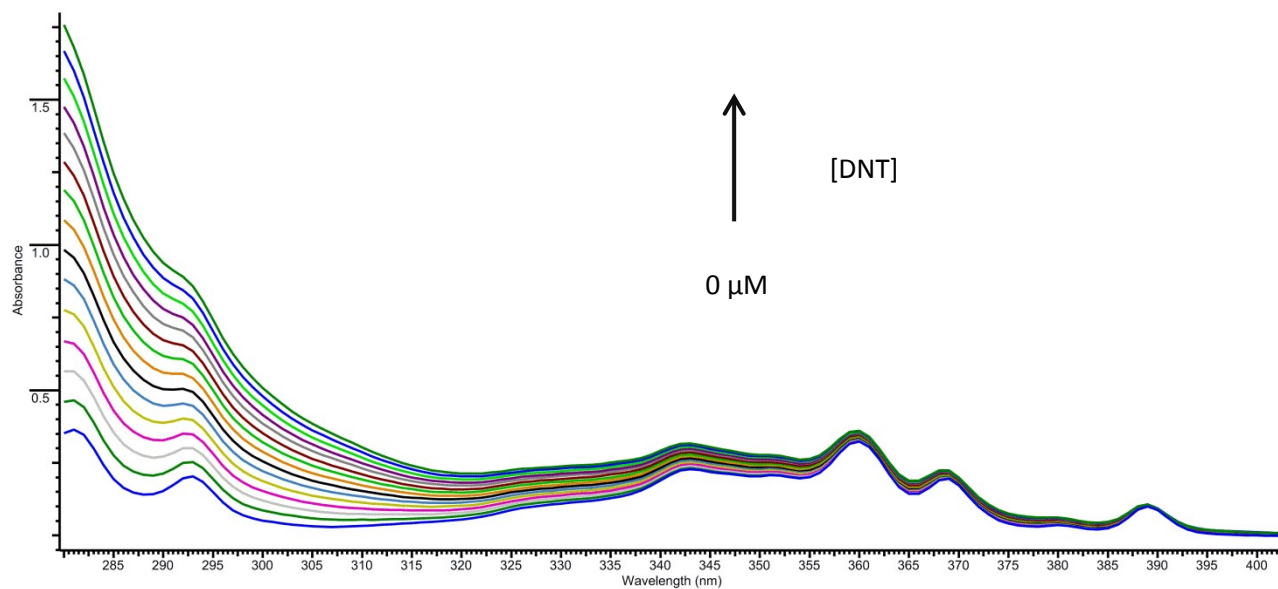

**Fig.S31** Absorbance quenching of the fluorophore **4a** with 2, 4-dinitrotoluene in THF

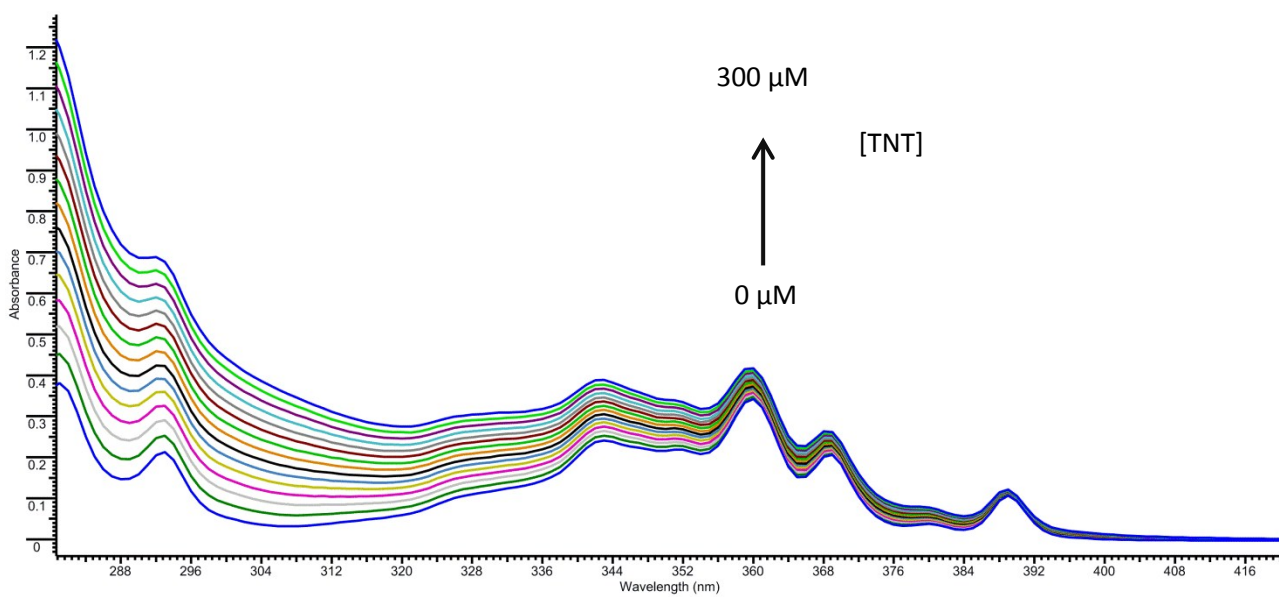

**Fig.S32** Absorbance quenching of the fluorophore **4a** with 2,4,6-trinitrotoluene in THF

Estimation of the detection limit for sensor 4a

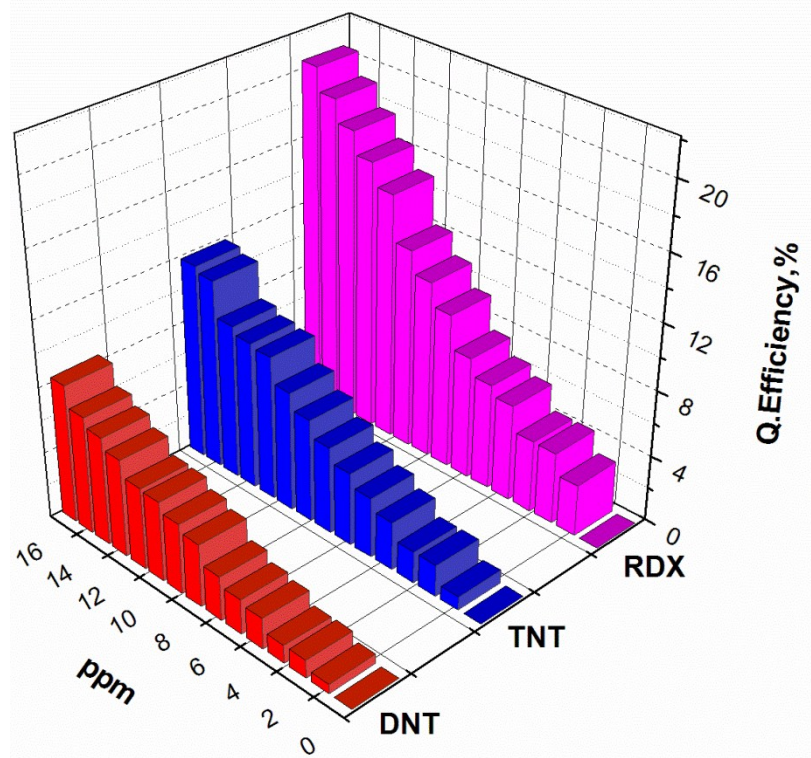

Fig.S33 Estimation of the detection limit for sensor 4a

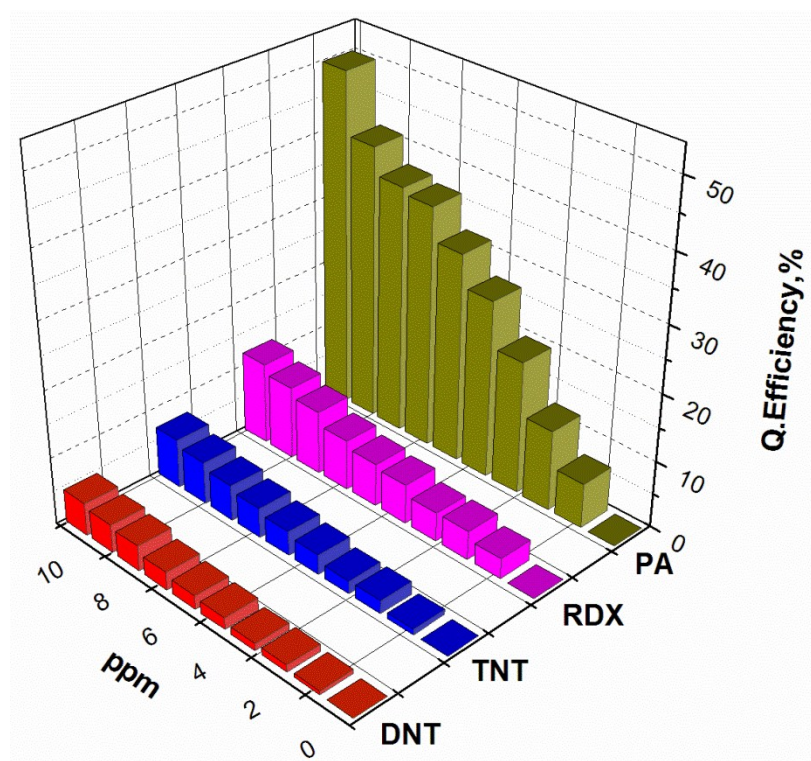

Fig.S34 Estimation of the detection limit for sensor 4a

# Electronic Supplementary Information

## PLQY

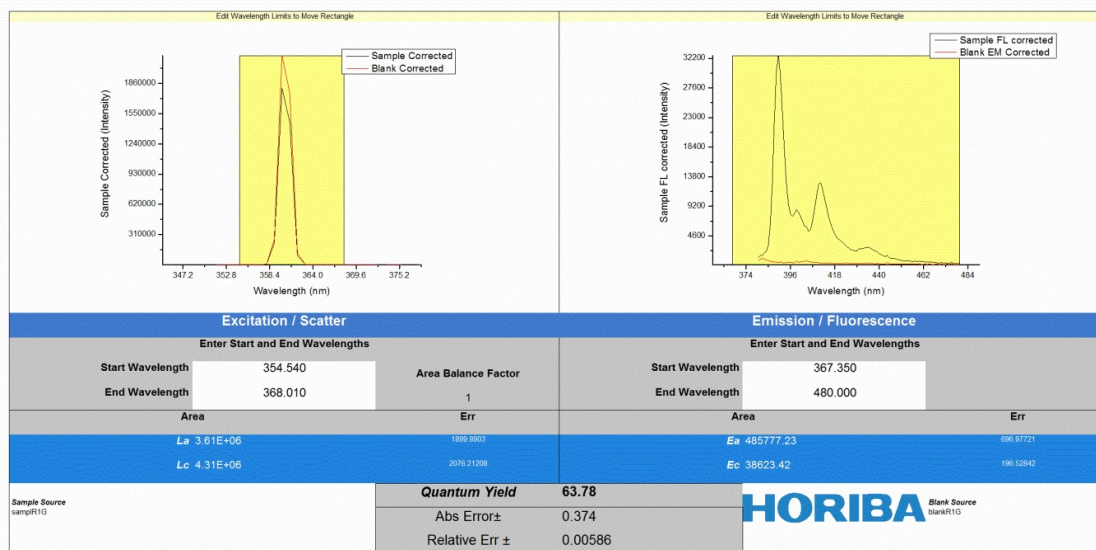

|                | <b>Ksv (R) in THF</b> |
|----------------|-----------------------|
| <b>NB</b>      | 806 (R=0.9883)        |
| <b>DNT</b>     | 836 (R=0.9914)        |
| <b>TNT</b>     | 1321 (R=0.9942)       |
| <b>TNP(PA)</b> | 8354 (R=0.9941)       |
| <b>RDX</b>     | 1548 (R=0.9794)       |

Electronic Supplementary Information

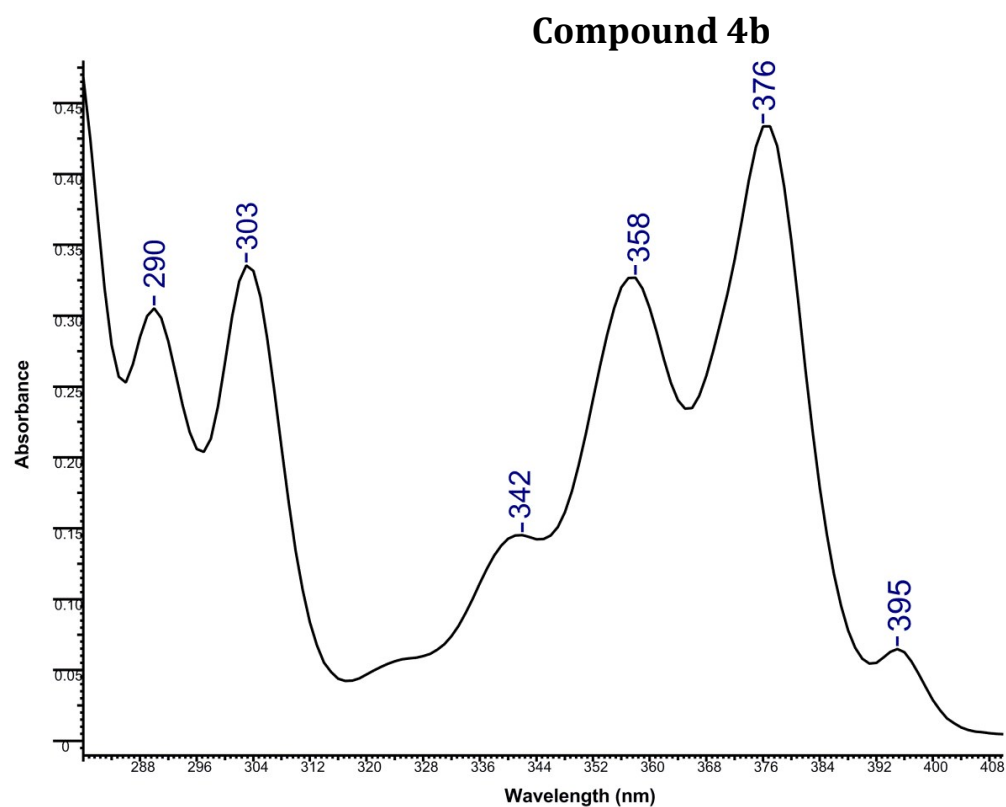

**Fig.S35** Electronic absorption spectrum of compound **4b**

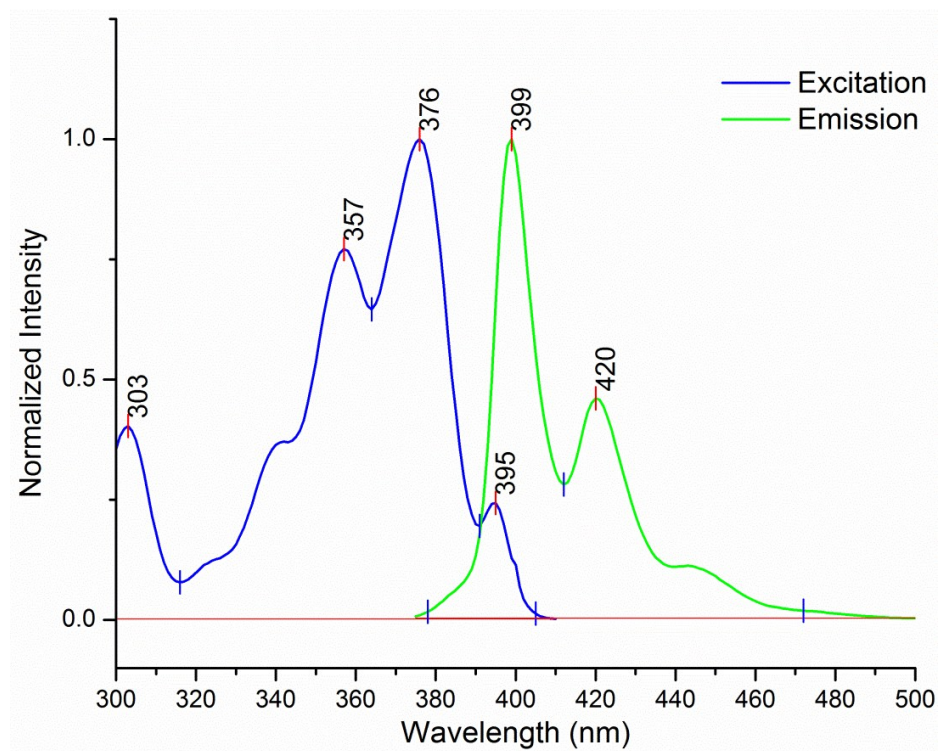

**Fig.S36** Fluorescence excitation and emission spectrum of compound **4b**

## Electronic Supplementary Information

### Fluorescence quenching with 2, 4-dinitrotoluene in THF

The fluorescence quenching of the fluorophore **4b** ( $1.0 \times 10^{-5}$  M) with 2, 4-dinitrotoluene ( $2.0 \times 10^{-3}$  M) was carried out in THF.

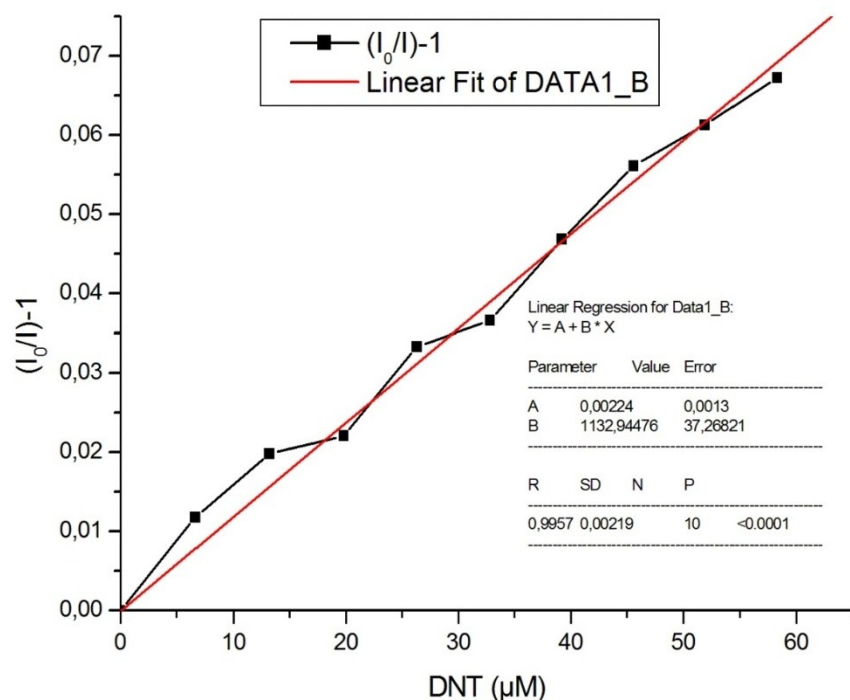

Fig.S37 Stern-Volmer plot

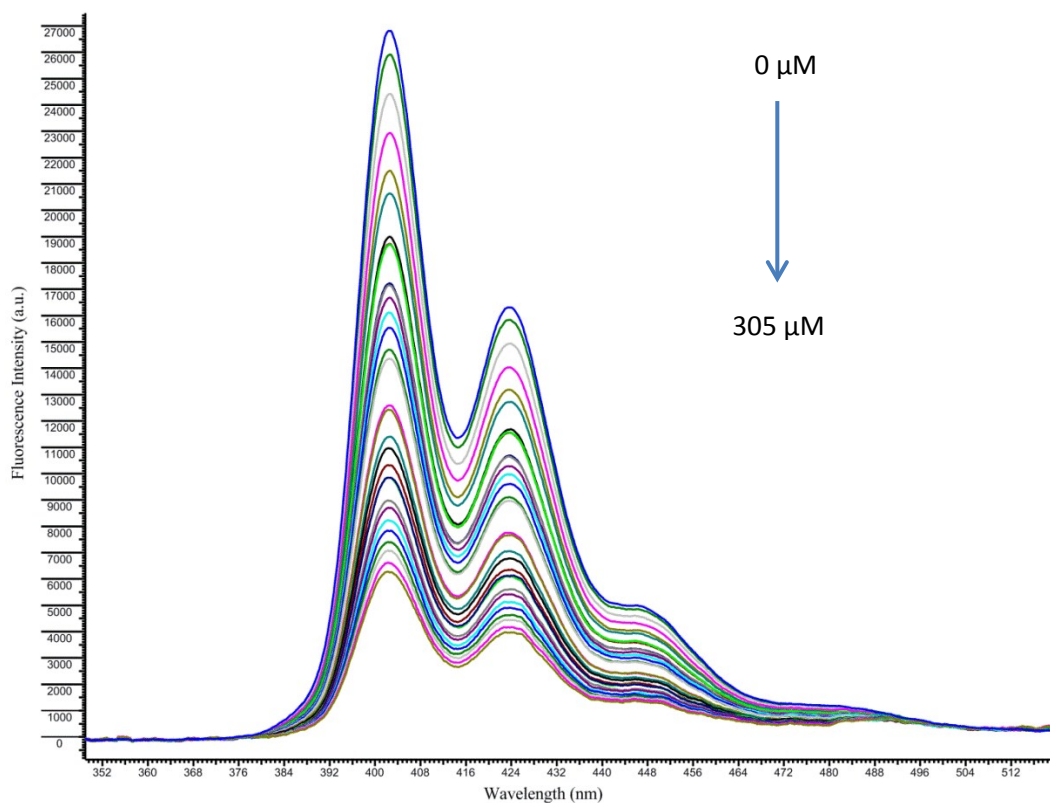

Fig.S38 Fluorescence quenching of the fluorophore **4b** with 2, 4-dinitrotoluene in THF

## Electronic Supplementary Information

### Fluorescence quenching with 2, 4-dinitrotoluene in toluene

The fluorescence quenching of the fluorophore **4b** ( $1.0 \times 10^{-5}$  M) with 2, 4-dinitrotoluene ( $2.0 \times 10^{-3}$  M) was carried out in toluene.

| DNT ( $\mu$ M) | $(I_0/I)-1$ |
|----------------|-------------|
| 0,00E+00       | 0,00000     |
| 6,64E+00       | 0,00965     |
| 1,32E+01       | 0,02085     |
| 1,98E+01       | 0,02085     |
| 2,63E+01       | 0,02929     |
| 3,28E+01       | 0,02988     |
| 3,92E+01       | 0,03866     |
| 4,56E+01       | 0,04032     |
| 5,19E+01       | 0,04230     |
| 5,83E+01       | 0,05161     |
| 6,45E+01       | 0,06889     |
| 7,07E+01       | 0,06906     |

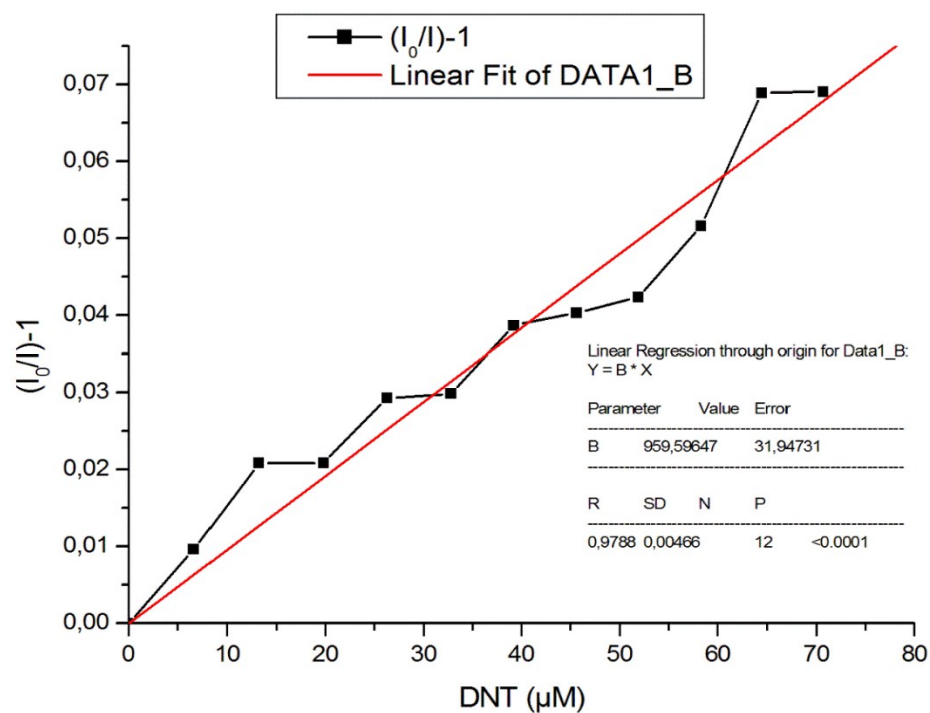

**Fig.S39** Stern-Volmer plot

**Fluorescence quenching with trinitrotoluene in THF**

The fluorescence quenching of the fluorophore **4b** ( $1.0 \times 10^{-5}$  M) with trinitrotoluene ( $2.0 \times 10^{-3}$  M) was carried out in THF.

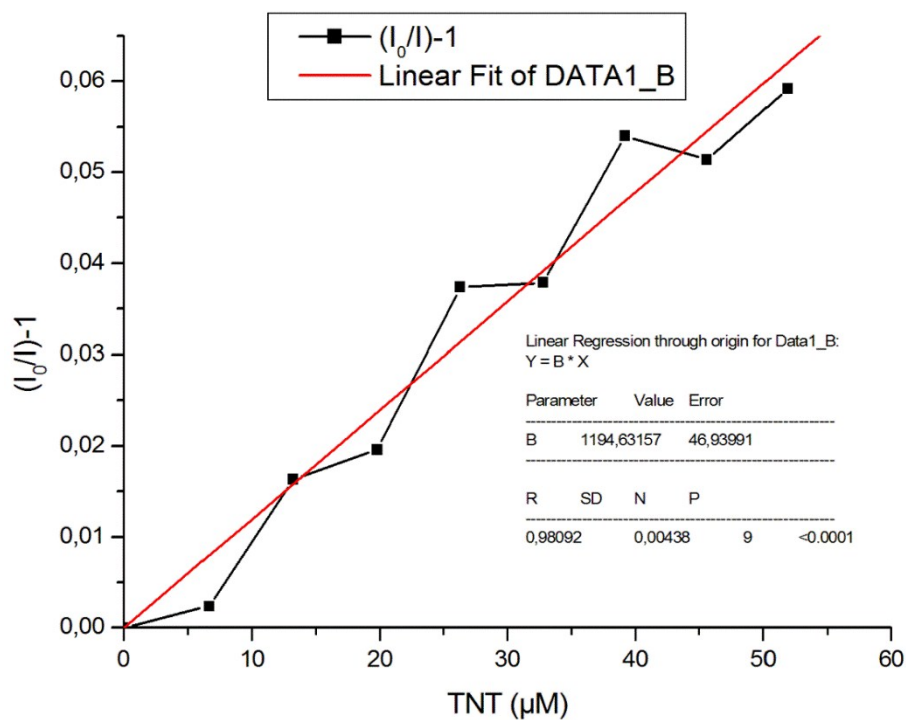

**Fig.S40** Stern-Volmer plot

## Electronic Supplementary Information

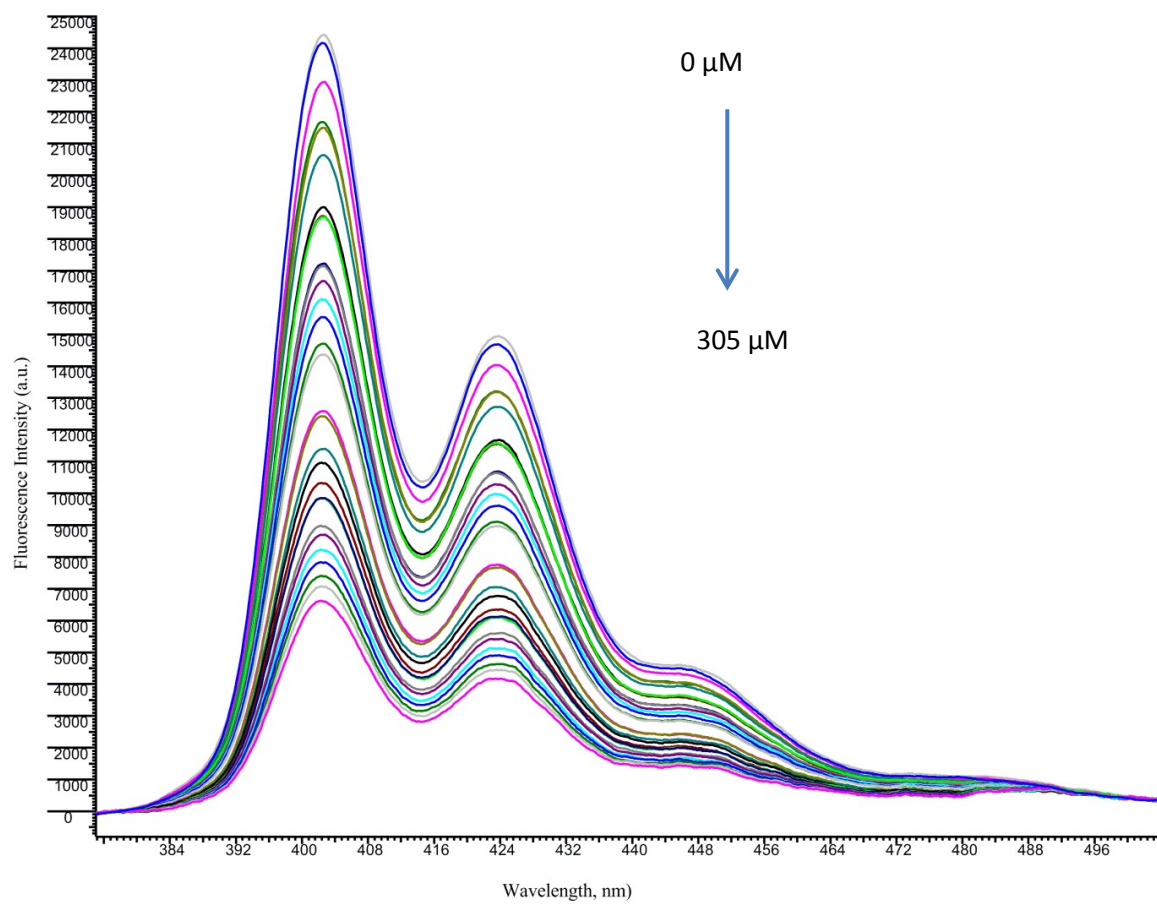

**Fig.S41** Fluorescence quenching of the fluorophore **4b** with trinitrotoluene in THF



## Electronic Supplementary Information

### Fluorescence quenching with picric acid in THF

The fluorescence quenching of the fluorophore **4b** ( $1.0 \times 10^{-5}$  M) with picric acid ( $2.0 \times 10^{-3}$  M) was carried out in THF.

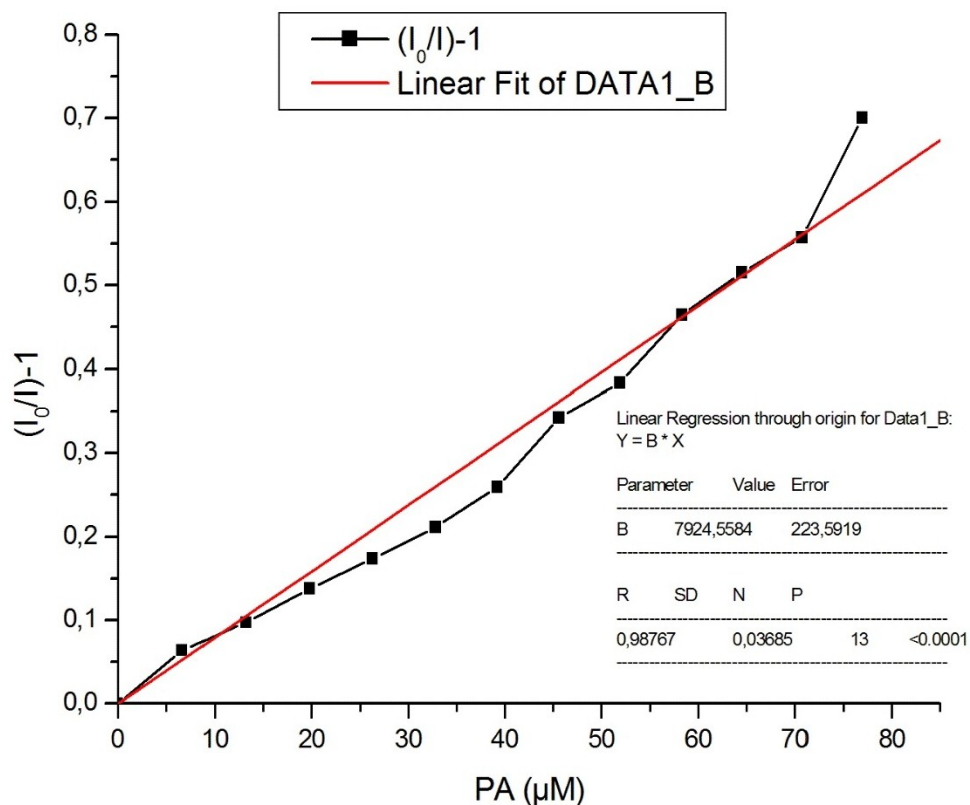

Fig.S42 Stern-Volmer plot

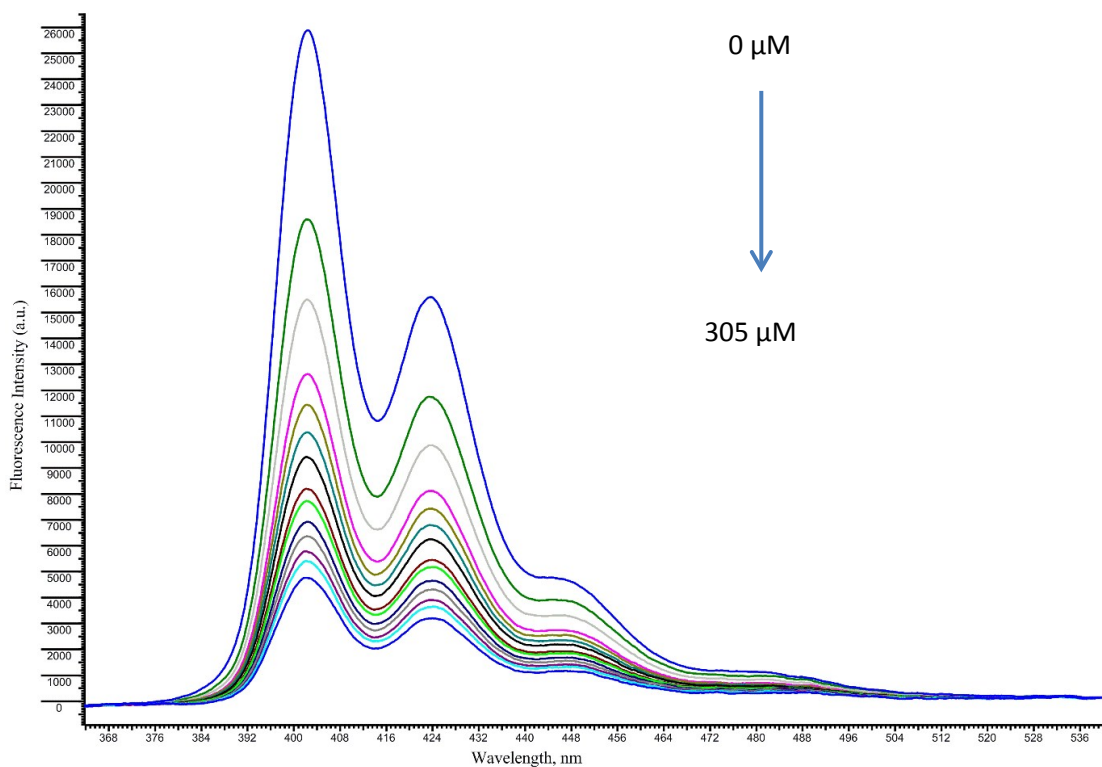

Fig.S43 Fluorescence quenching of the fluorophore **4b** with picric acid in THF

## Electronic Supplementary Information

### Fluorescence quenching with picric acid in toluene

The fluorescence quenching of the fluorophore **4b** ( $1.0 \times 10^{-5}$  M) with picric acid ( $2.0 \times 10^{-3}$  M) was carried out in toluene.

| PA ( $\mu\text{M}$ ) | $(I_0/I)-1$ |
|----------------------|-------------|
| 0,00E+00             | 0,00000     |
| 6,64E+00             | 0,09709     |
| 1,32E+01             | 0,17726     |
| 1,98E+01             | 0,29447     |
| 2,63E+01             | 0,47234     |
| 3,28E+01             | 0,57155     |
| 3,92E+01             | 0,69578     |
| 4,56E+01             | 0,84285     |
| 5,19E+01             | 0,94581     |
| 5,83E+01             | 1,01377     |
| 6,45E+01             | 1,23852     |
| 7,07E+01             | 1,42511     |
| 7,69E+01             | 1,87606     |

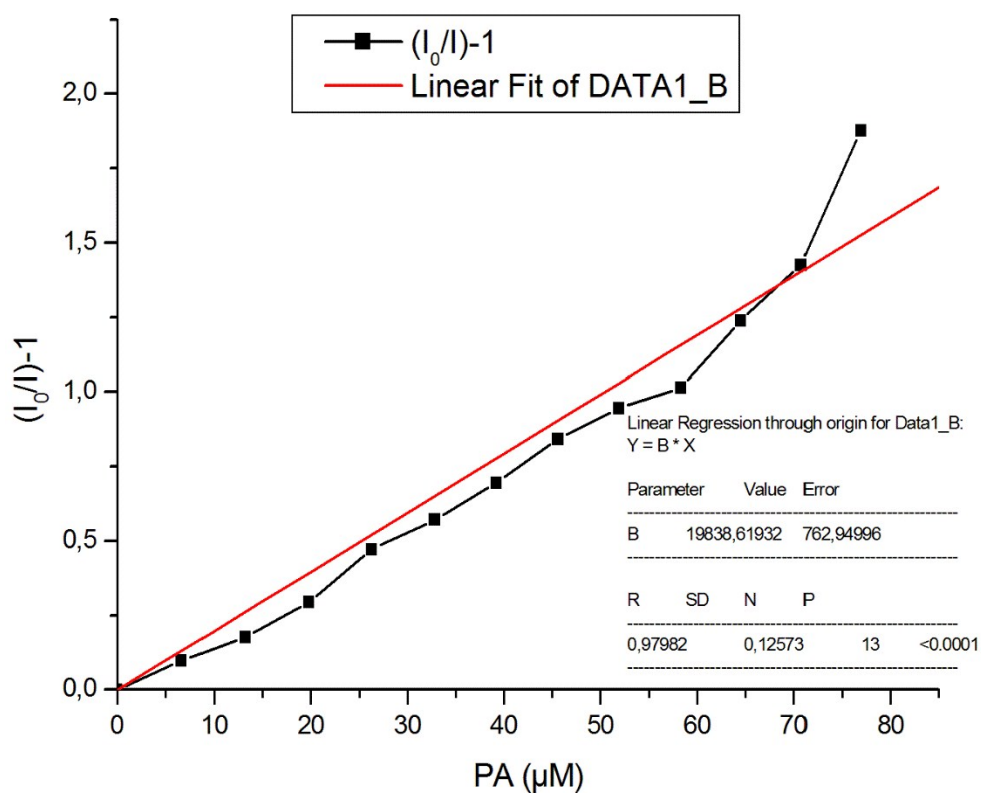

Fig.S44 Stern-Volmer plot

|            | <b>K<sub>sv</sub> (R) in THF</b> | <b>K<sub>sv</sub> (R) in Toluene</b> |
|------------|----------------------------------|--------------------------------------|
| <b>DNT</b> | 1132 (R=0.9957)                  | 959 (R=0.9788)                       |
| <b>TNT</b> | 1194 (R=0.961)                   | -                                    |
| <b>PA</b>  | 7924 (R=0.9877)                  | 19638 (R=0.9798)                     |

Estimation of the detection limit for sensor 4b

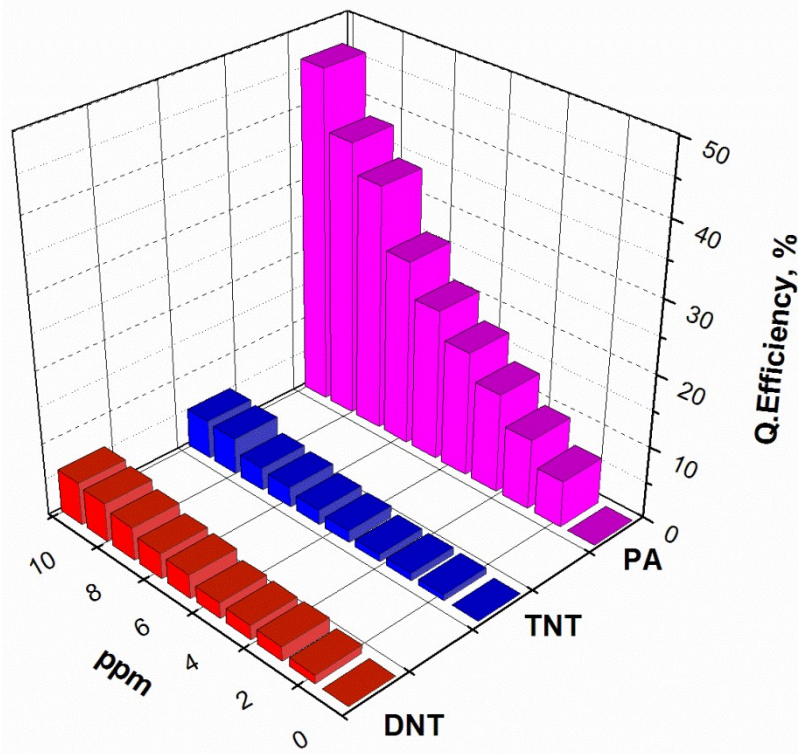

Fig.S45 Estimation of the detection limit for sensor 4b

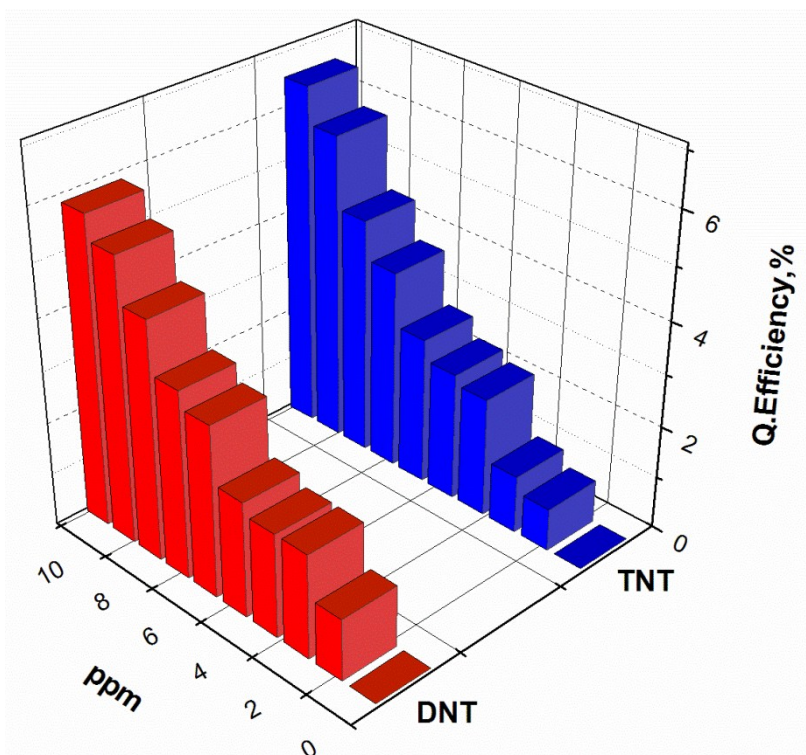

Fig.S46 Estimation of the detection limit for sensor 4b

# Electronic Supplementary Information

## PLQY

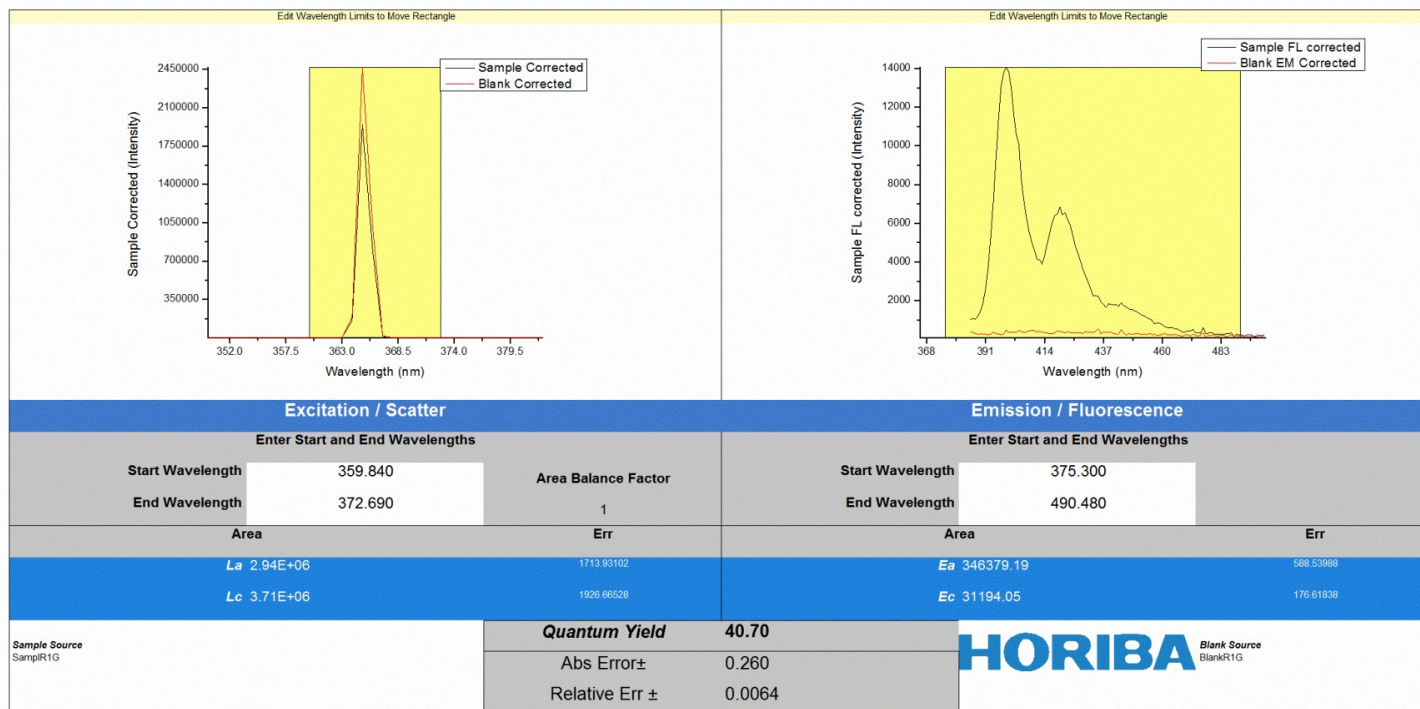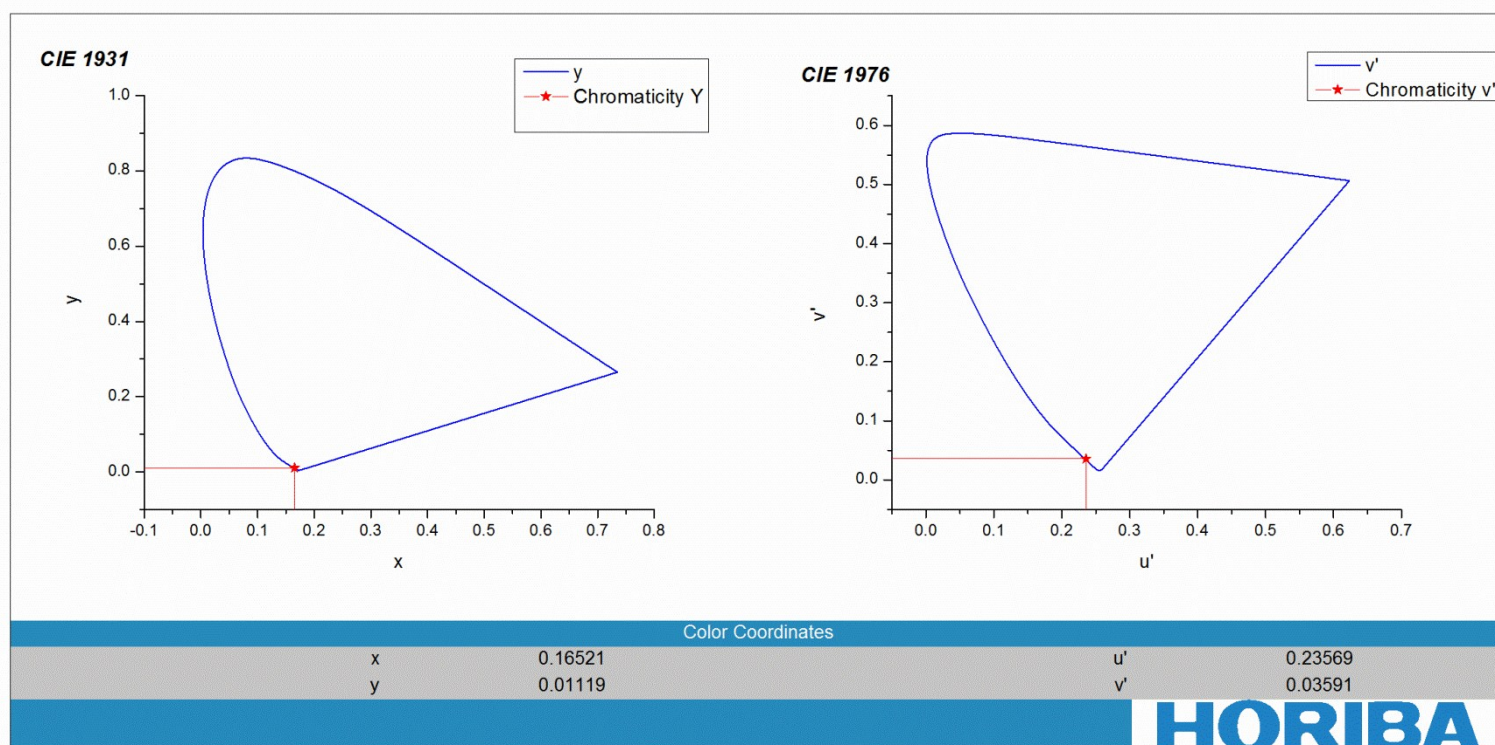

**Compound 4c**

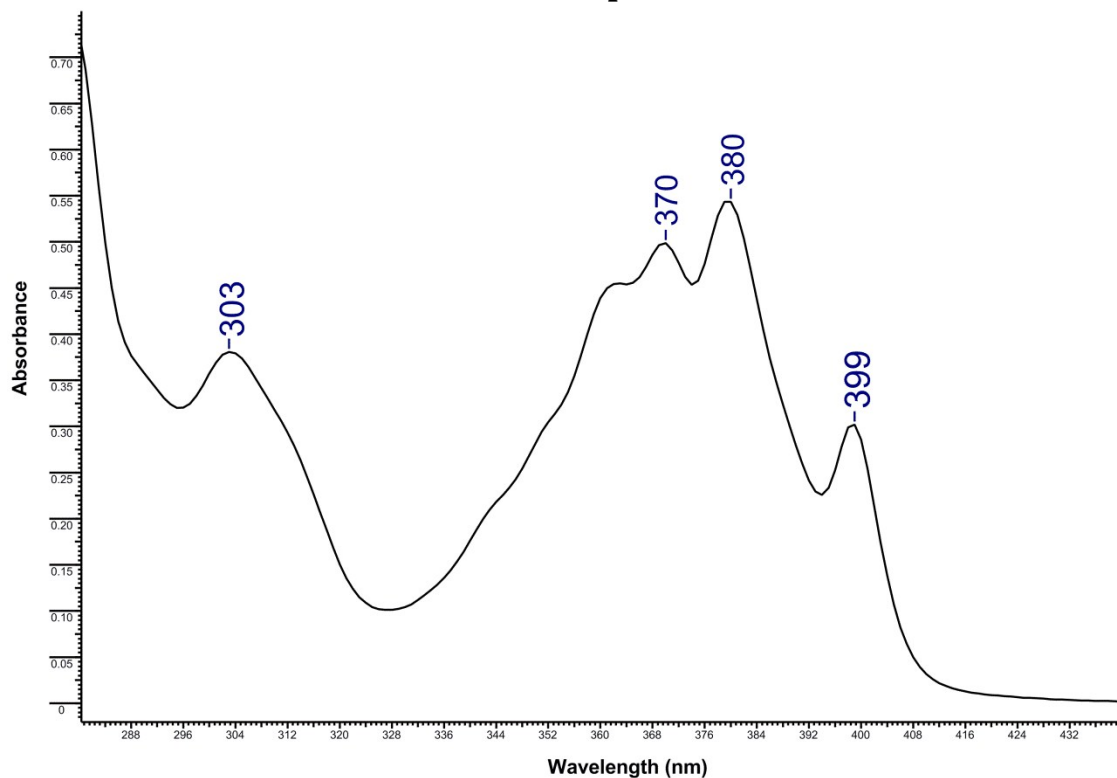

**Fig.S47** Electronic absorption spectrum of compound 4c

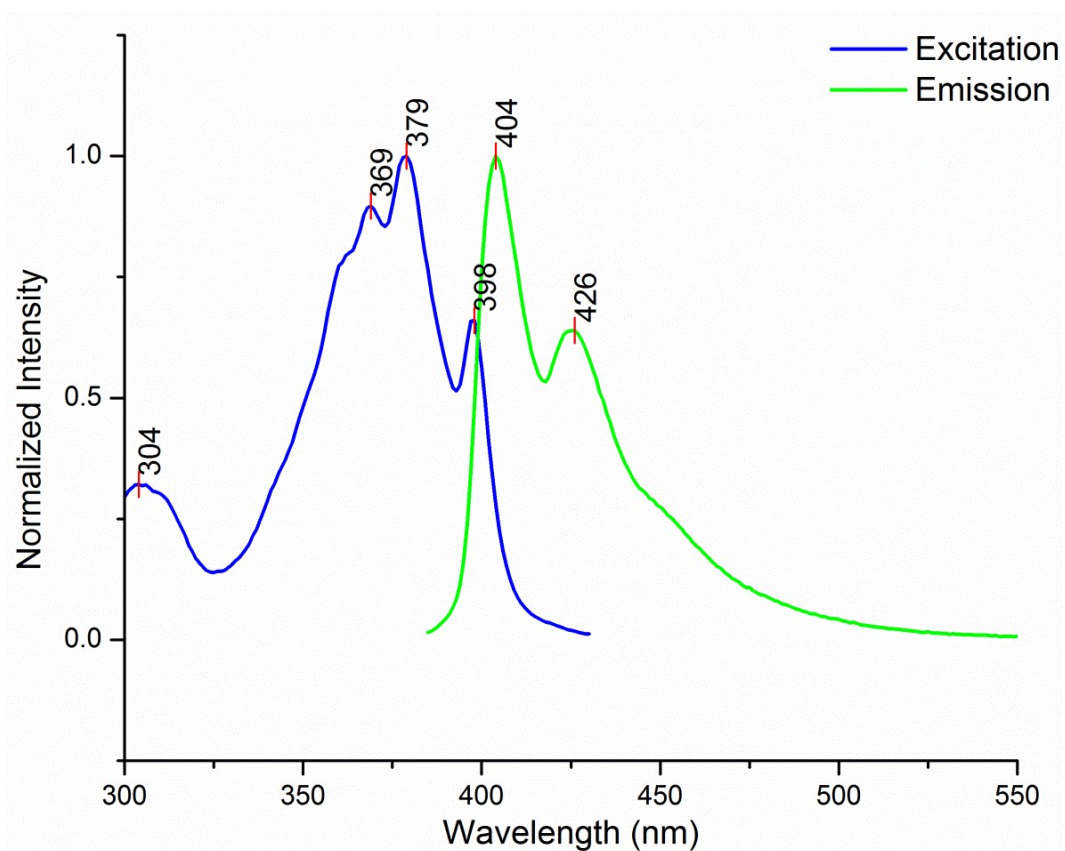

**Fig.S48** Fluorescence excitation and emission spectrum of compound 4c

## Electronic Supplementary Information

### Fluorescence quenching with 2,4-dinitrotoluene in THF

The fluorescence quenching of the fluorophore **4c** ( $1.0 \times 10^{-5}$  M) with 2, 4-dinitrotoluene ( $2.0 \times 10^{-3}$  M) was carried out in THF.

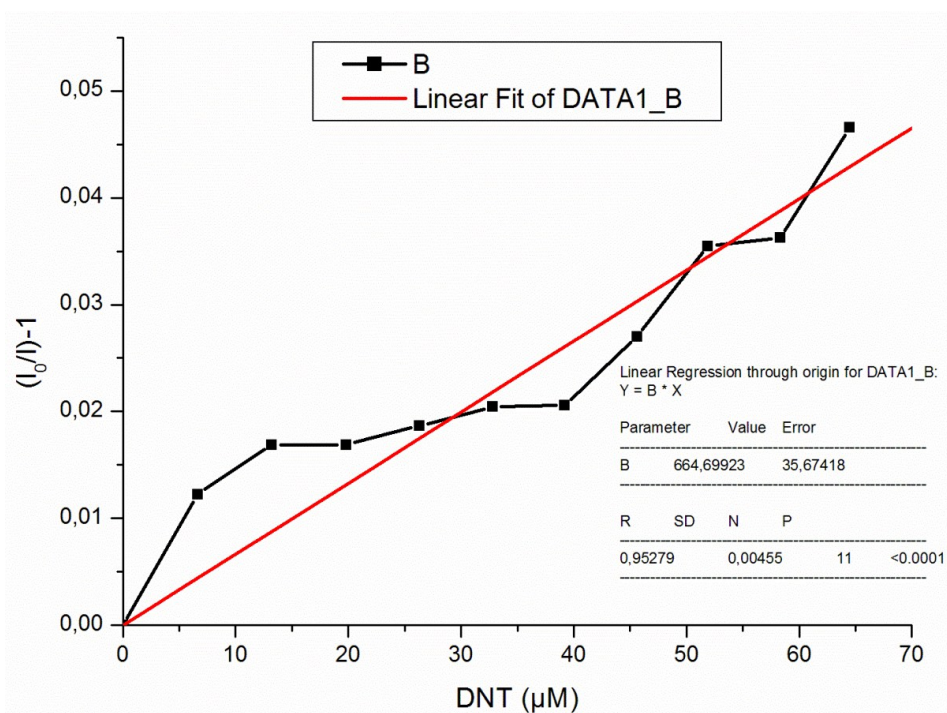

Fig.S49 Stern-Volmer plot

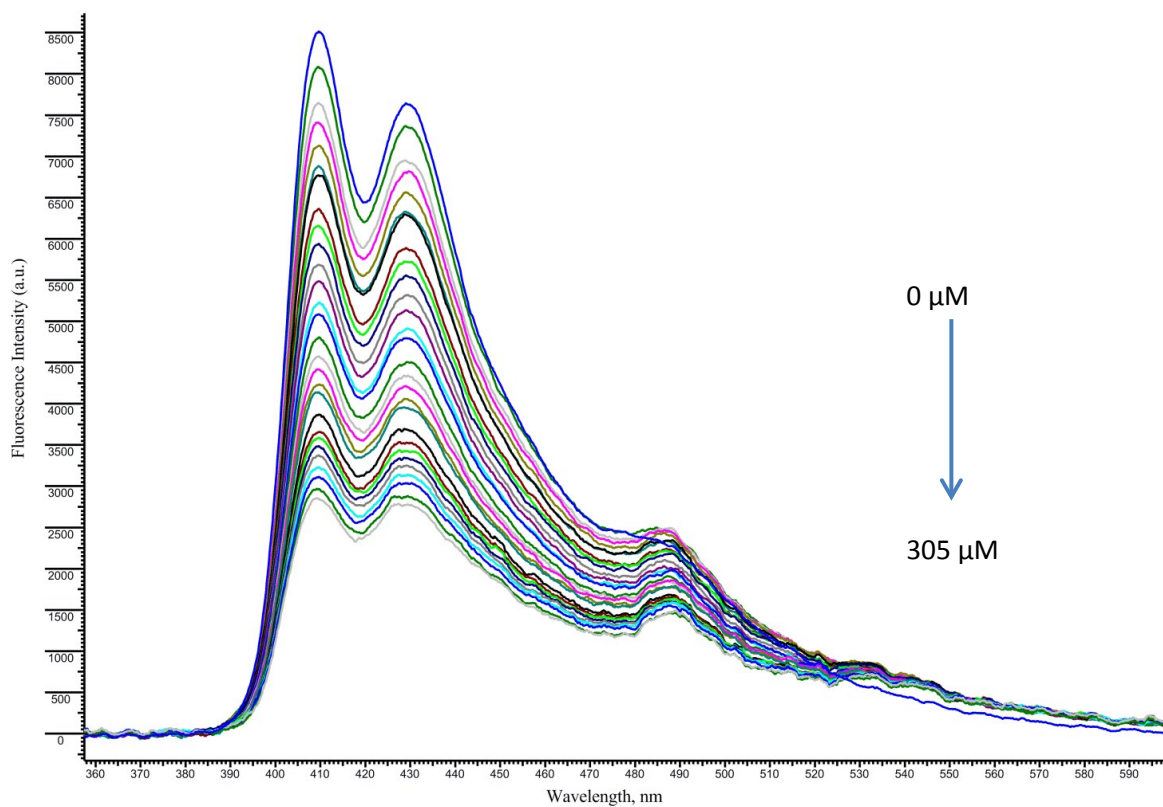

Fig.S50 Fluorescence quenching of the fluorophore **4c** with 2,4-DNT in THF

## Electronic Supplementary Information

### Fluorescence quenching with trinitrotoluene in THF

The fluorescence quenching of the fluorophore **4c** ( $1.0 \times 10^{-5}$  M) with trinitrotoluene ( $2.0 \times 10^{-3}$  M) was carried out in THF.

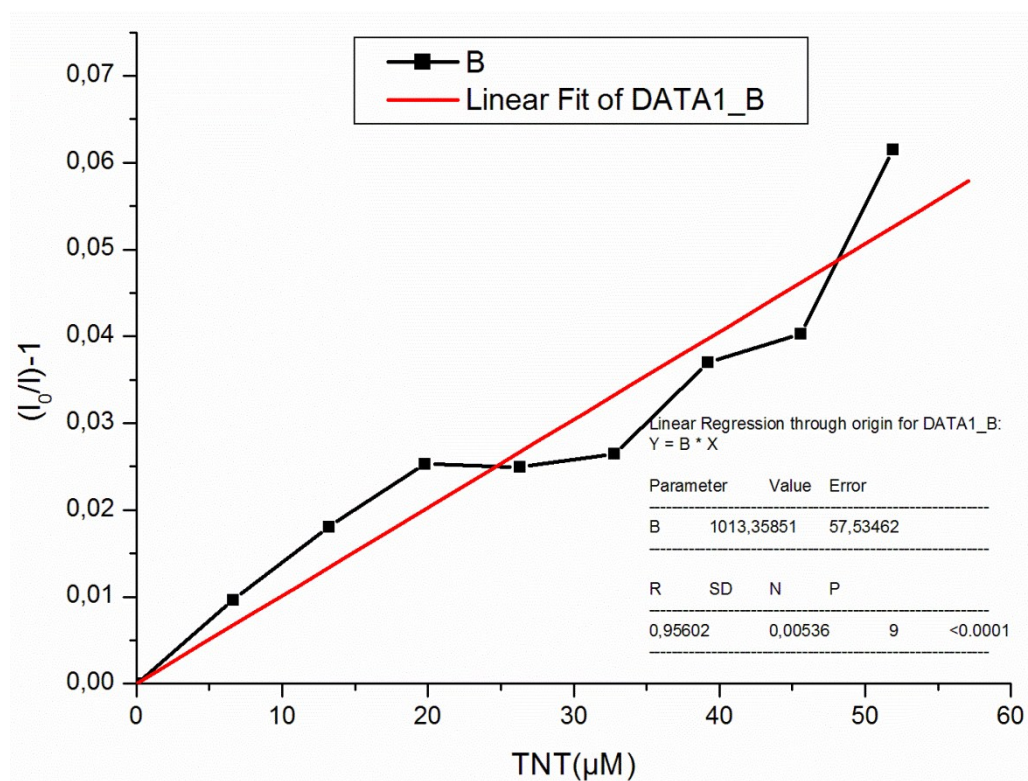

**Fig.S51** Stern-Volmer plot

## Electronic Supplementary Information

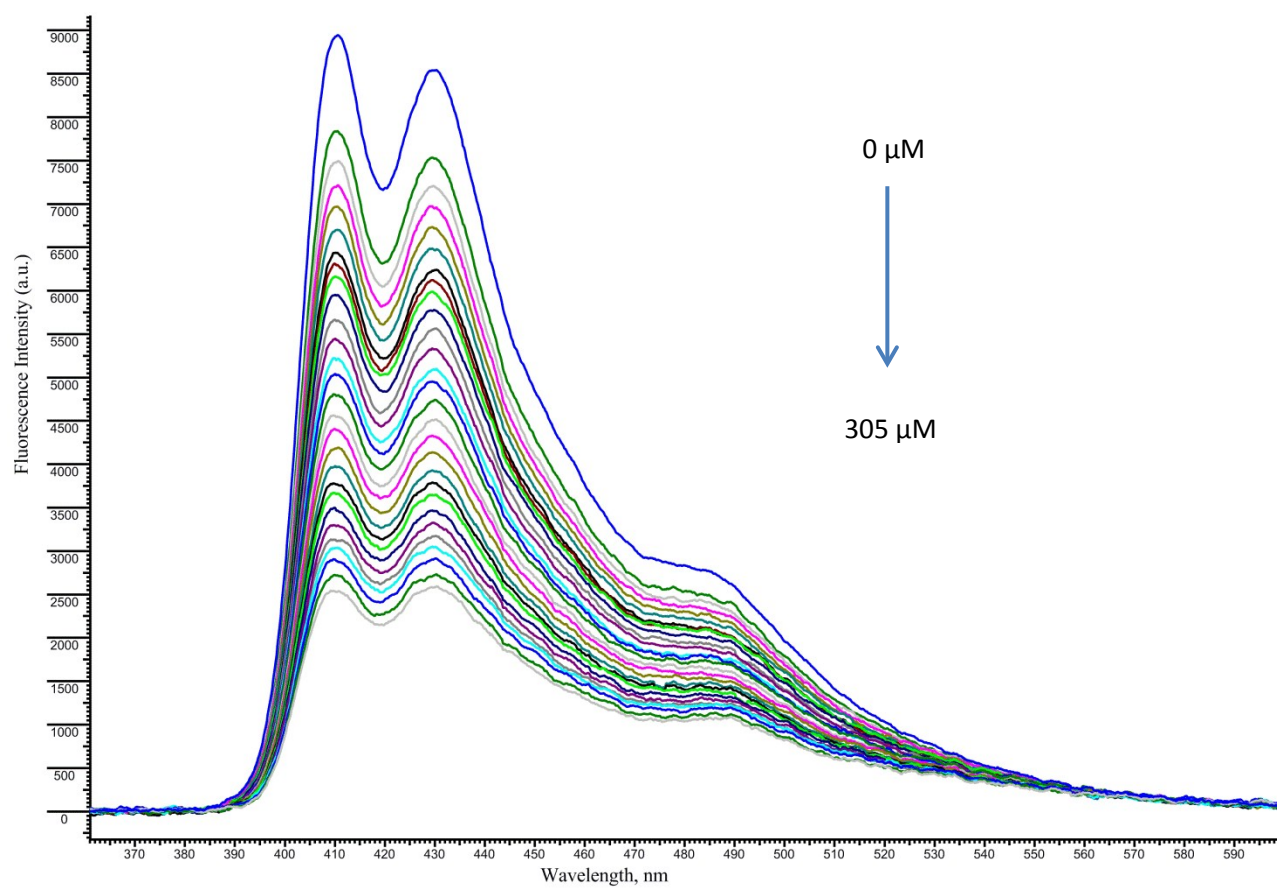

**Fig.S52** Fluorescence quenching of the fluorophore **4c** with TNT in THF



## Electronic Supplementary Information

### Fluorescence quenching with picric acid in THF

The fluorescence quenching of the fluorophore **4c** ( $1.0 \times 10^{-5}$  M) with picric acid ( $2.0 \times 10^{-3}$  M) was carried out in THF.

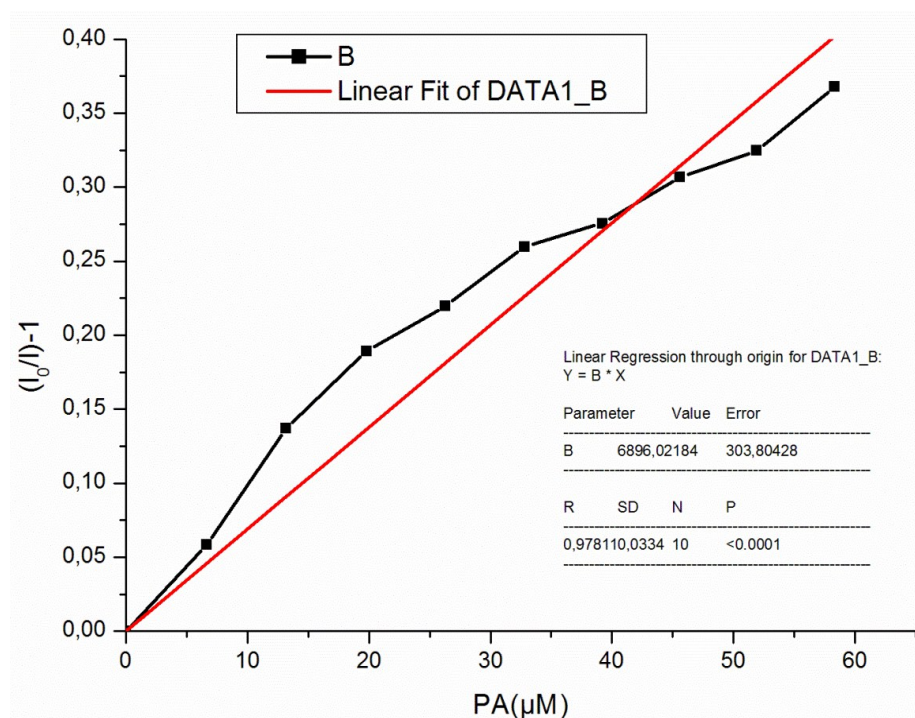

Fig.S53 Stern-Volmer plot

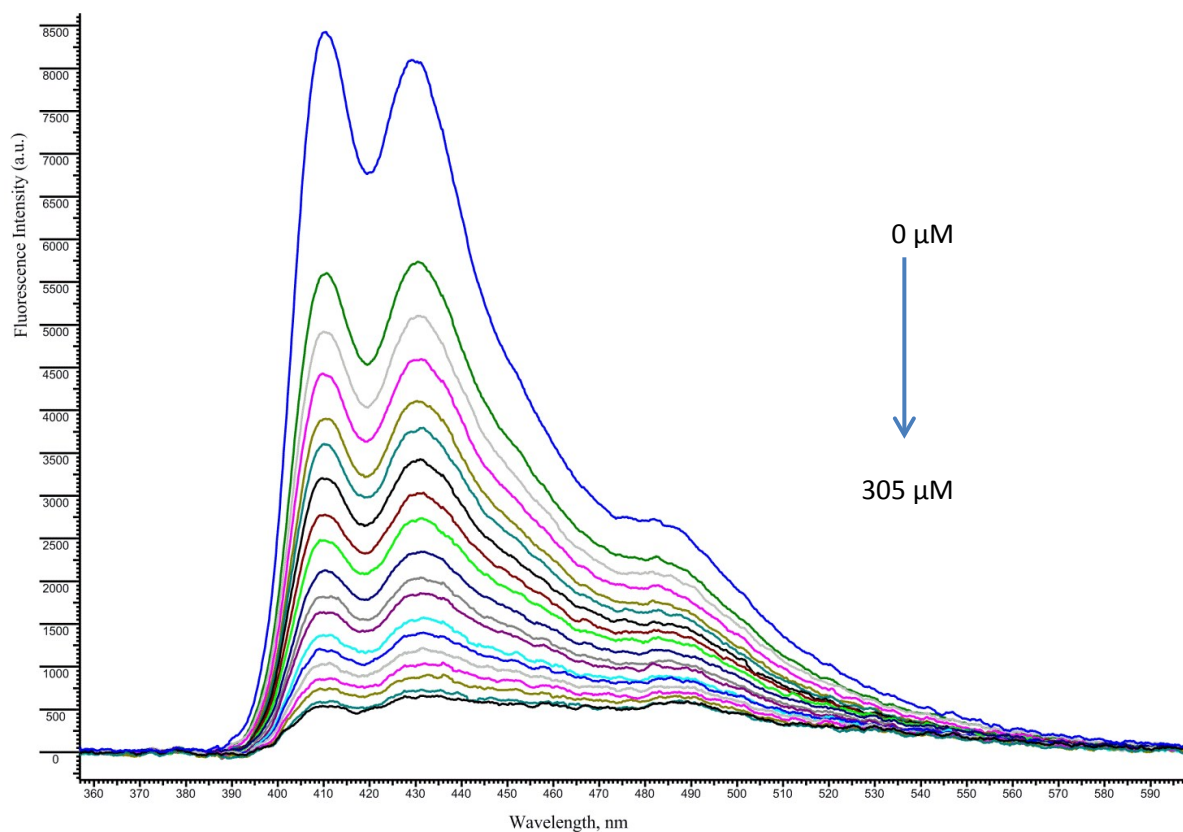

Fig.S54 Fluorescence quenching of the fluorophore **4c** with PA in THF

## Electronic Supplementary Information

|     | K <sub>sv</sub> (R) in THF |
|-----|----------------------------|
| DNT | 665 (R=0.9528)             |
| TNT | 1013 (R=0.9560)            |
| PA  | 6896 (R=0.9781)            |

### Estimation of the detection limit for sensor 4c

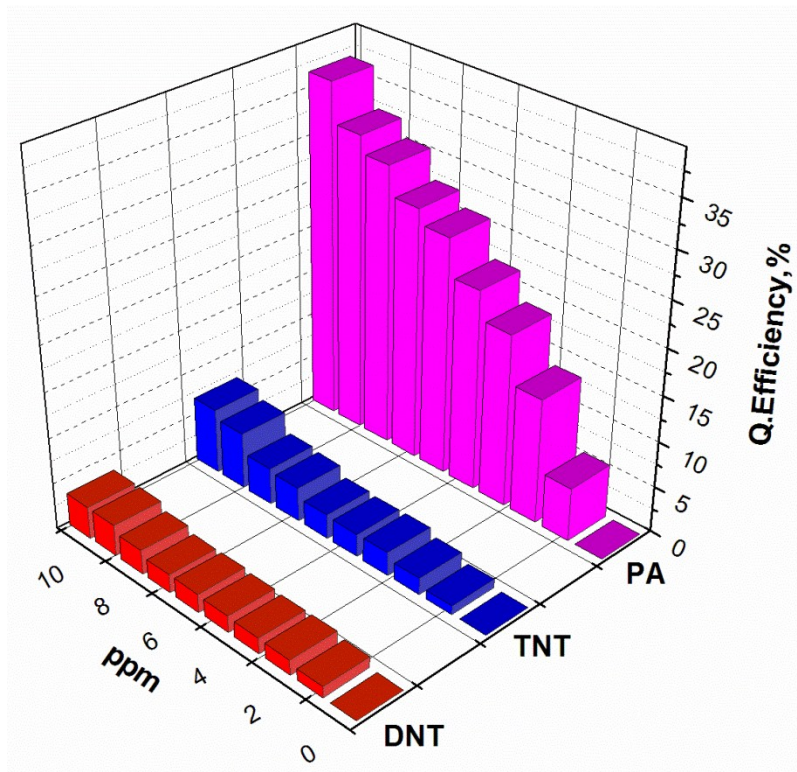

Fig.S55 Estimation of the detection limit for sensor 4c

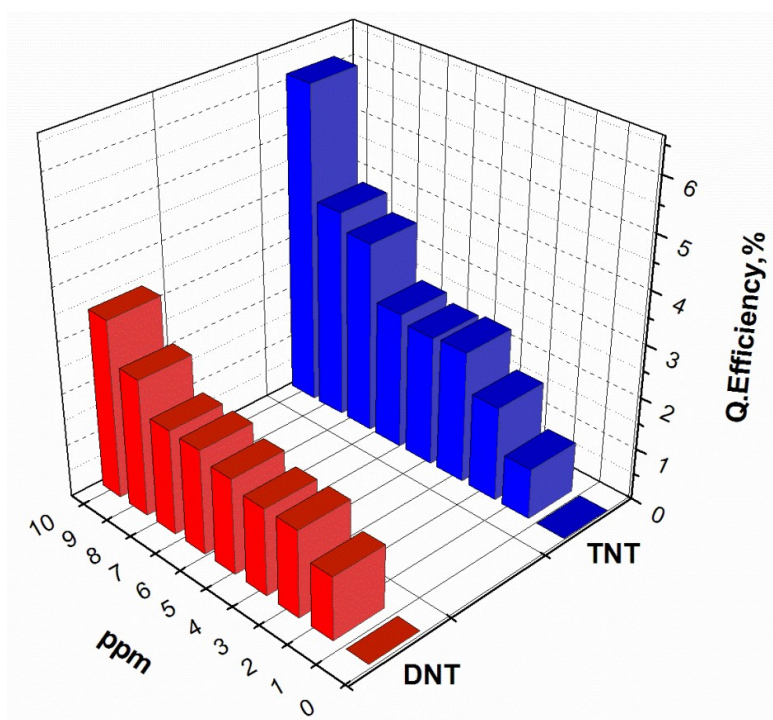

Fig.S56 Estimation of the detection limit for sensor 4c

# Electronic Supplementary Information

## PLQY

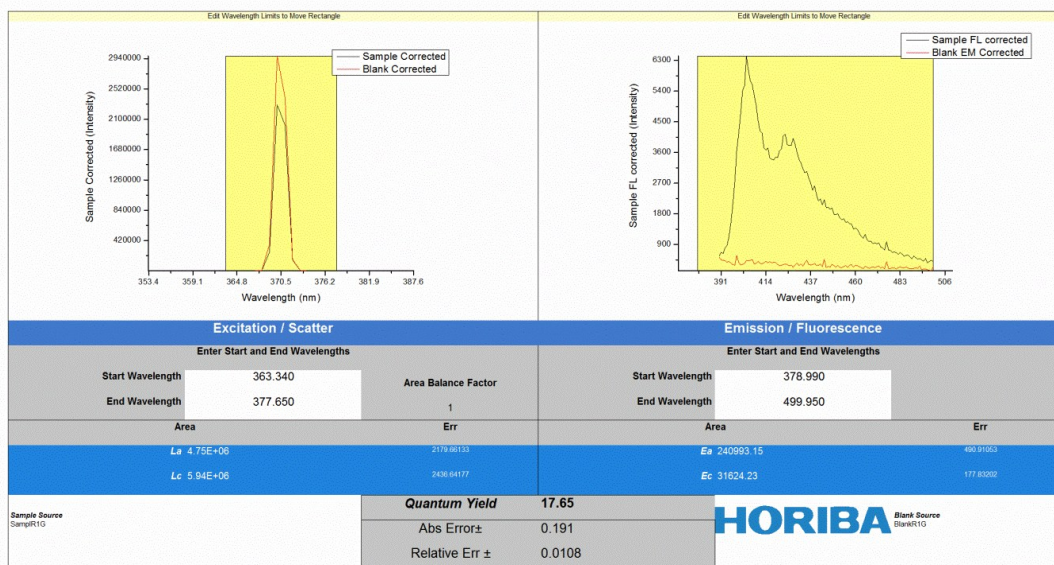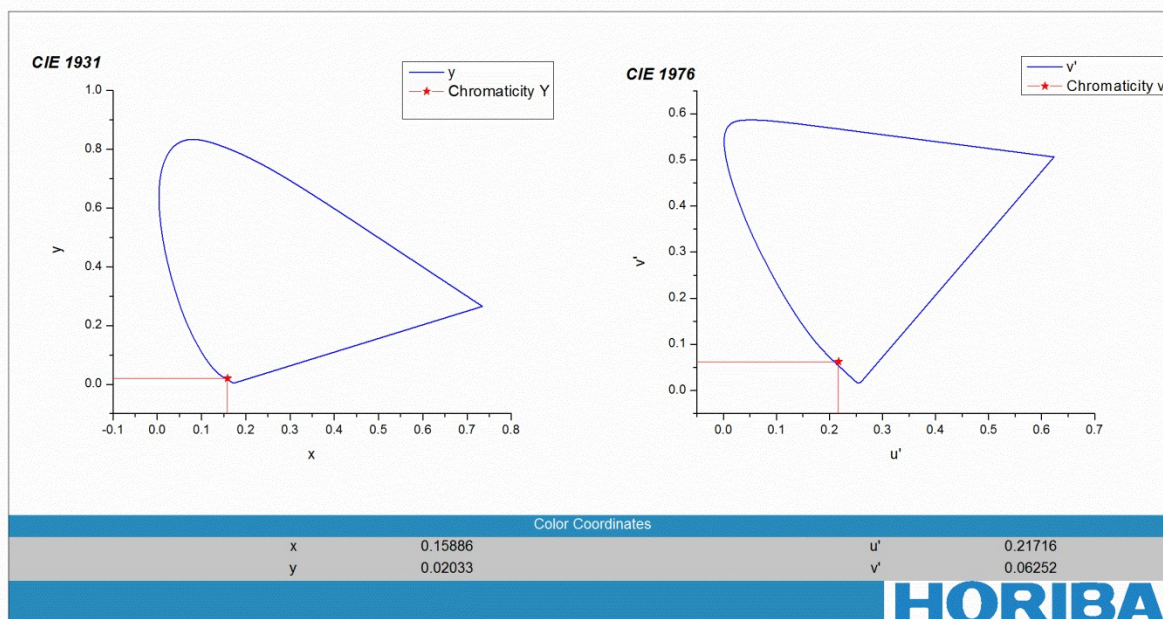

**Estimation of the detection limit presented in terms of the fluorescence quenching efficiency (%) after addition of TNT for all sensors**

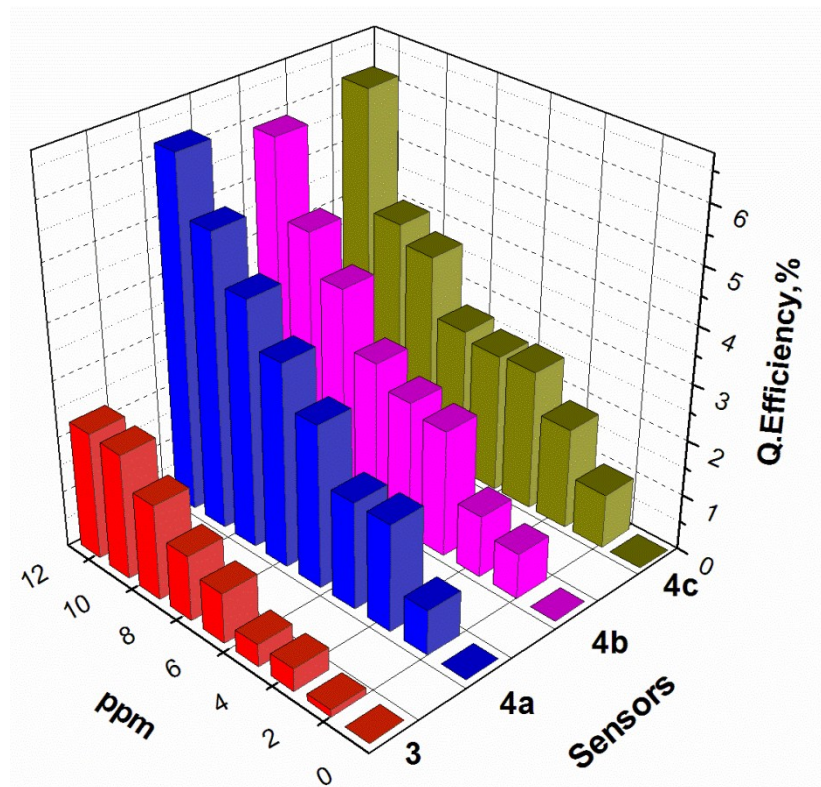

**Fig.S57** Estimation of the detection limit presented in terms of the fluorescence quenching efficiency (%) after addition of TNT in THF with different concentrations

## Electronic Supplementary Information

### Fluorescence quenching with benzoquinone in THF

The fluorescence quenching of the fluorophore **4a** ( $1.0 \times 10^{-6}$  M) with benzoquinone ( $2.0 \times 10^{-2}$  M) was carried out in THF.

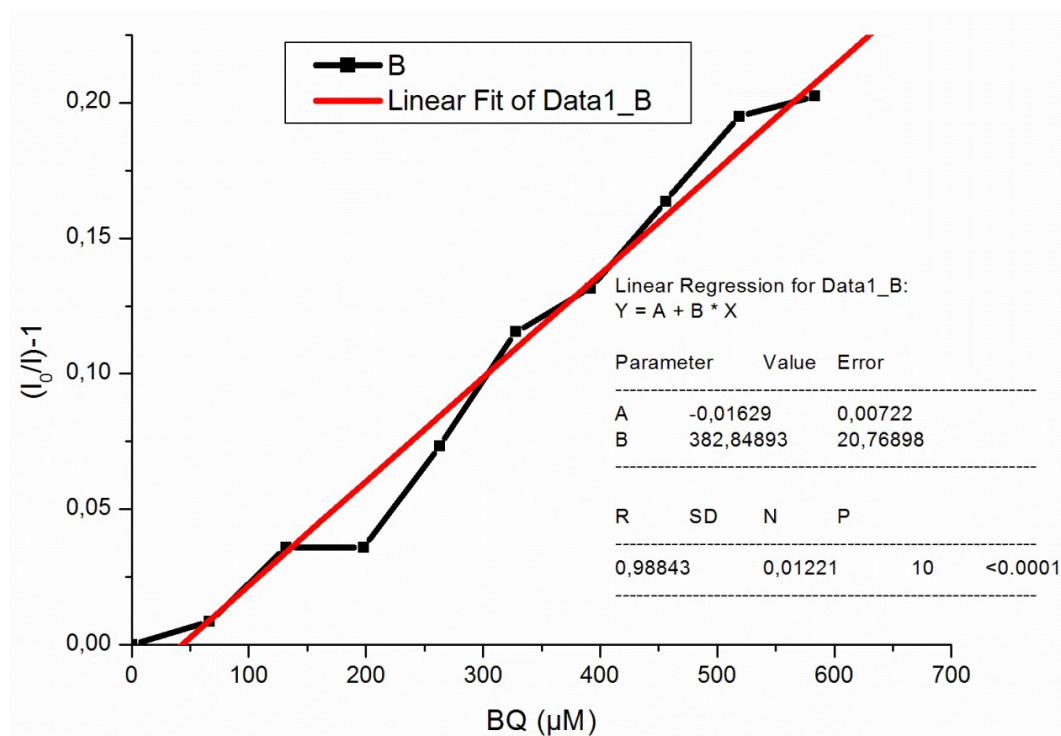

**Fig.58** Stern-Volmer plot

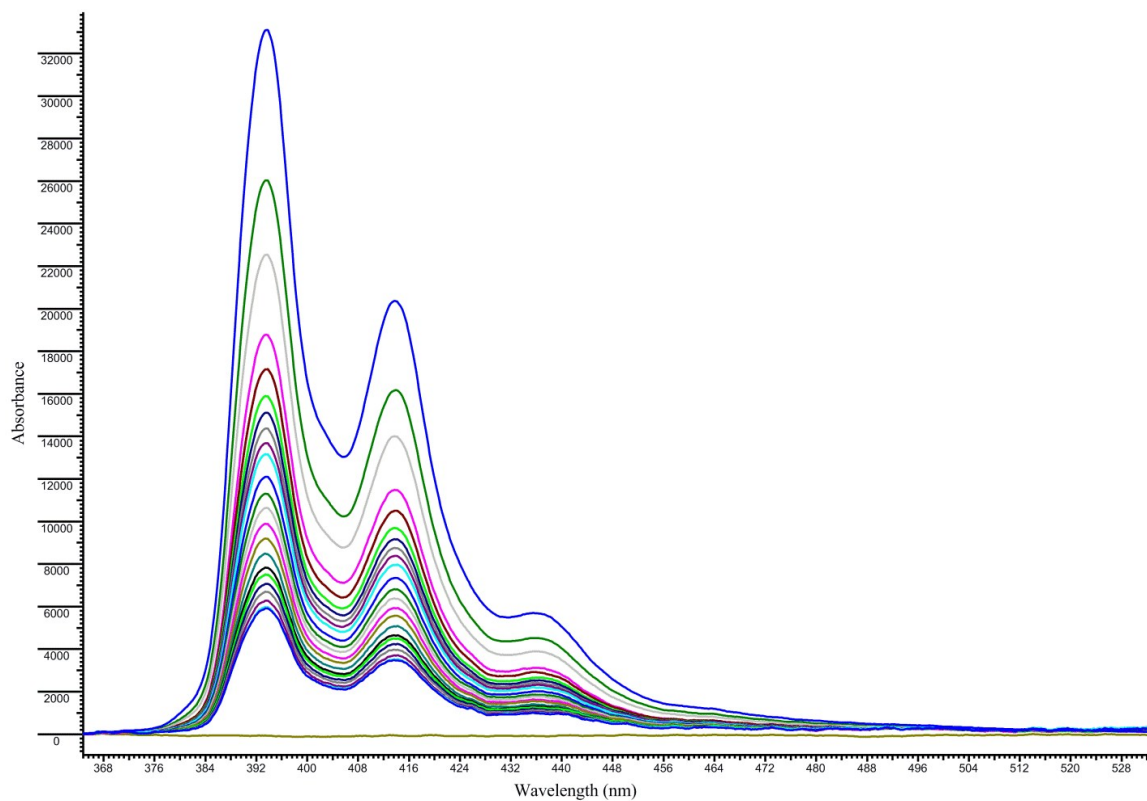

**Fig.59** Fluorescence quenching of the fluorophore **4a** with benzoquinone in THF

### The detection of lifetime of 4a fluorophore at different mole ratios of TNT and RDX

**Table S1** Fluorescence lifetime data of pure 4a fluorophore at different mole ratios of TNT

| Mole ratio vs TNT | 4a fluorophore (ns)<br>$\tau$ |
|-------------------|-------------------------------|
| 0,0               | 4,780                         |
| 1:0,2             | 4,629                         |
| 1:0,4             | 4,521                         |
| 1:0,6             | 4,606                         |
| 1:0,8             | 4,631                         |
| 1:1,0             | 4,804                         |
| 1:1,2             | 4,794                         |

|    | 0 eq        | 0.2 eq      | 0.4 eq      | 0.6 eq      | 0.8 eq      | 1.0 eq      | 1.2 eq     |
|----|-------------|-------------|-------------|-------------|-------------|-------------|------------|
| A  | 7,7861E-01  | 6,7935E-01  | 7,1202E-01  | 6,6055E-01  | 6,6179E-01  | 7,0080E-01  | 6,6318E-01 |
| B1 | -1,0671E-01 | -1,0358E-01 | -1,1102E-01 | -1,0412E-01 | -1,1007E-01 | -1,0086E-01 | 1,0393E-01 |
| B2 | 9,8272E-02  | 9,6092E-02  | 9,9563E-02  | 9,7781E-02  | 1,0121E-01  | 9,2815E-02  | 9,7432E-02 |
| B3 | 3,9659E-03  | 3,2914E-03  | 3,6824E-03  | 3,3812E-03  | 3,5095E-03  | 3,5837E-03  | 3,4578E-03 |
| T1 | 3,6578E-10  | 3,4803E-10  | 3,4328E-10  | 3,5607E-10  | 3,5237E-10  | 3,3519E-10  | 3,4863E-10 |
| T2 | 1,3749E-09  | 1,3514E-09  | 1,3393E-09  | 1,3443E-09  | 1,3428E-09  | 1,3965E-09  | 1,3801E-09 |
| T3 | 4,7803E-09  | 4,6295E-09  | 4,5212E-09  | 4,6065E-09  | 4,6307E-09  | 4,8045E-09  | 4,7937E-09 |

$$F(x) = A + B1 * \exp\left(-\frac{x}{T1}\right) + B2 * \exp\left(-\frac{x}{T2}\right) + B3 * \exp\left(-\frac{x}{T3}\right)$$

## Electronic Supplementary Information

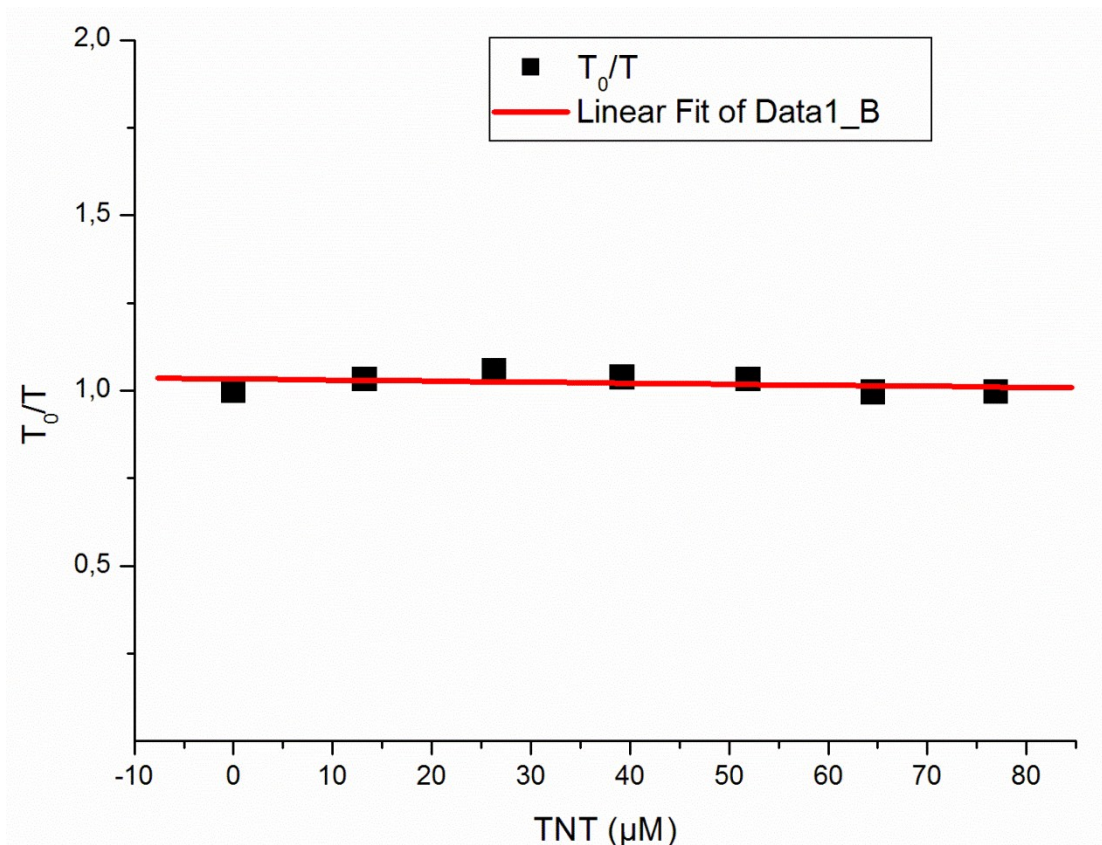

**Fig.S60**  $T_0/T$  at 410 nm ( $\lambda_{\text{ex}}=375$  nm) of **4a** as a function of the concentration of the quencher (TNT)

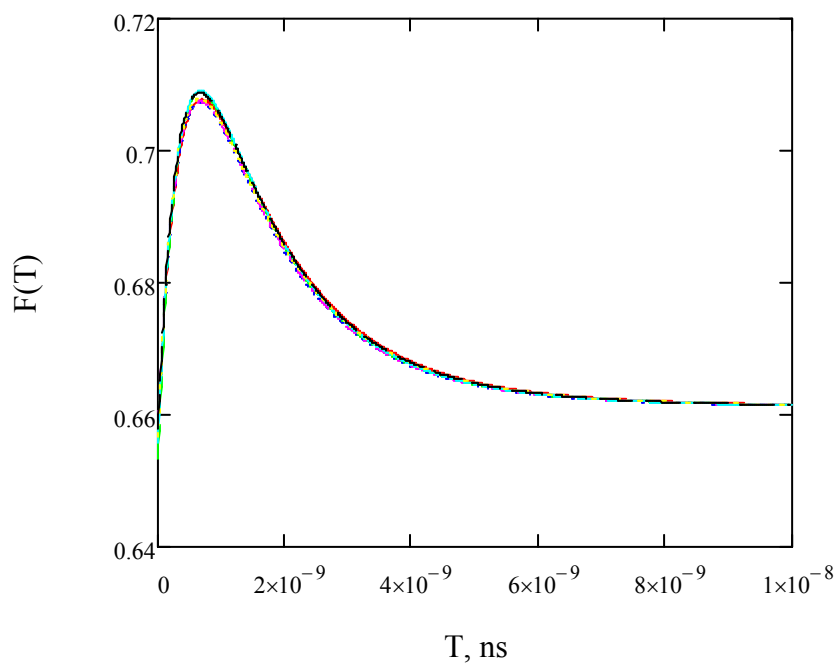

**Fig.S61**  $F(T)$  of **4a** as a function of the concentration of the lifetime ( $T$ )

## Electronic Supplementary Information

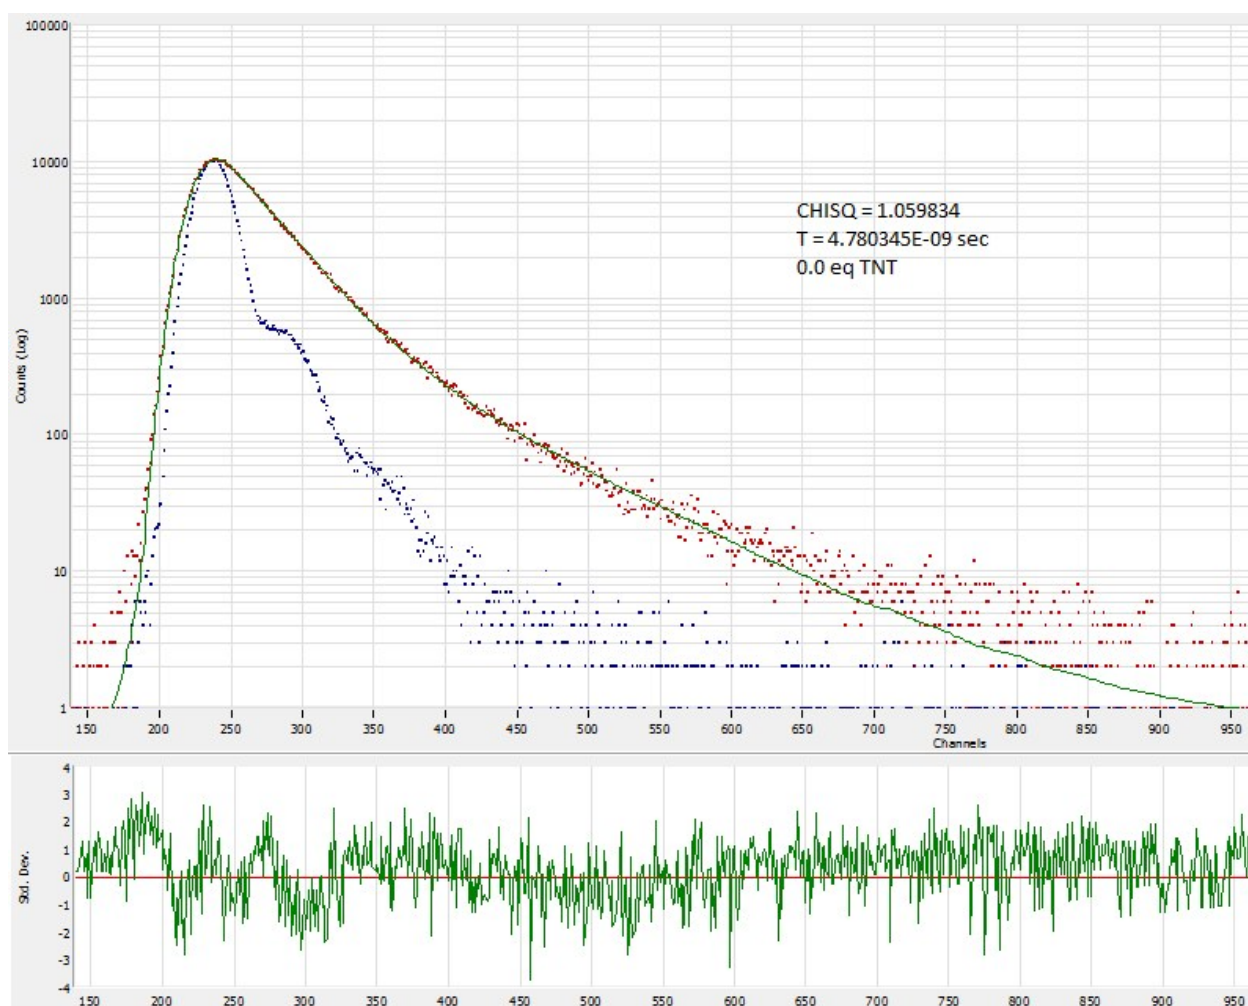

**Fig. S62** Time-resolved fluorescence emission of **4a** adduct with TNT



## Electronic Supplementary Information

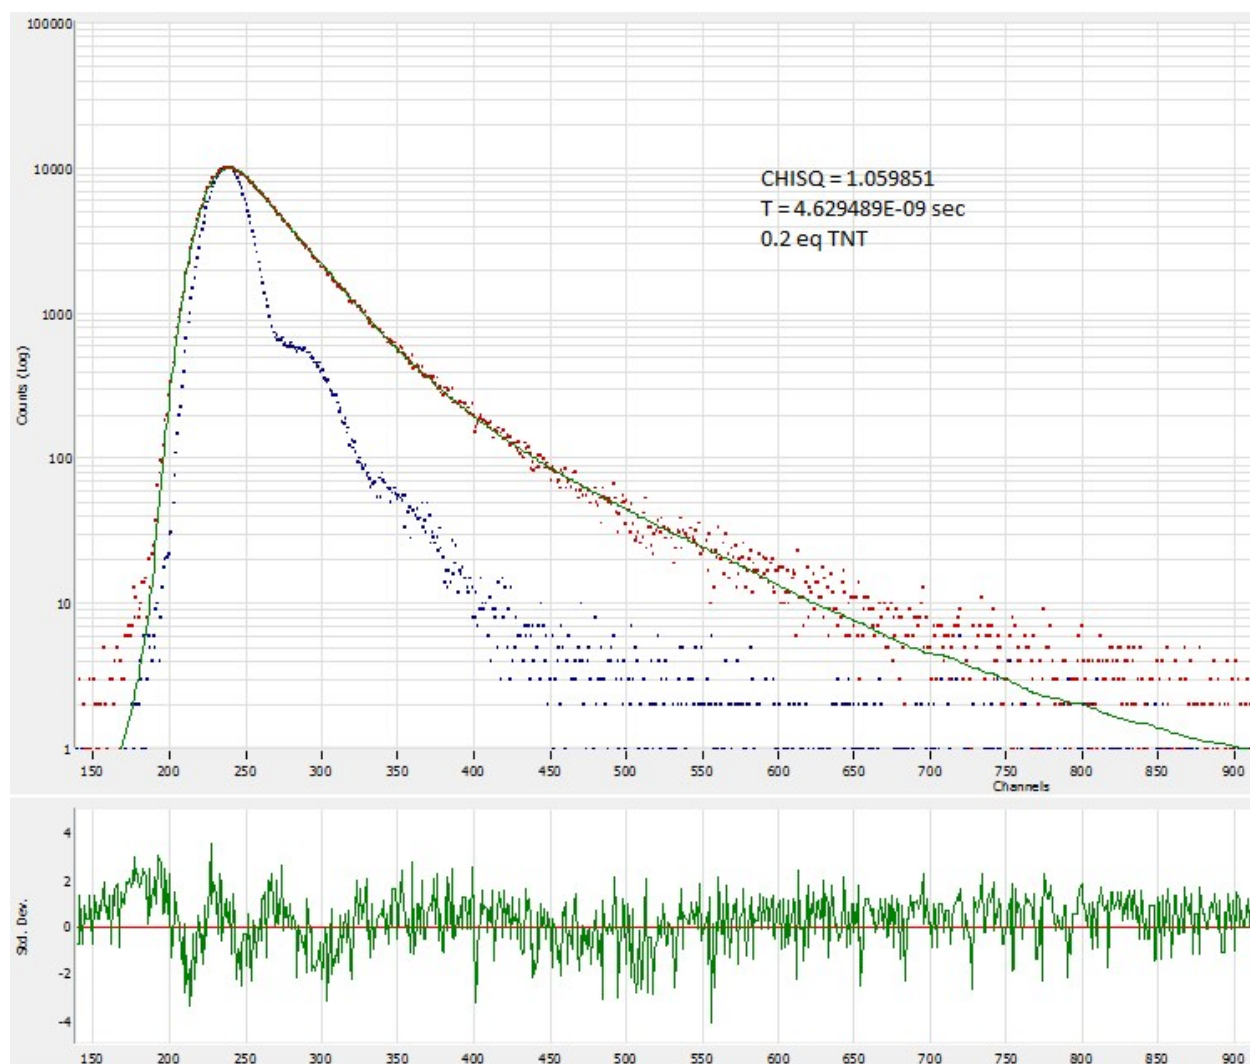

**Fig.S63** Time-resolved fluorescence emission of **4a** adduct with TNT

## Electronic Supplementary Information

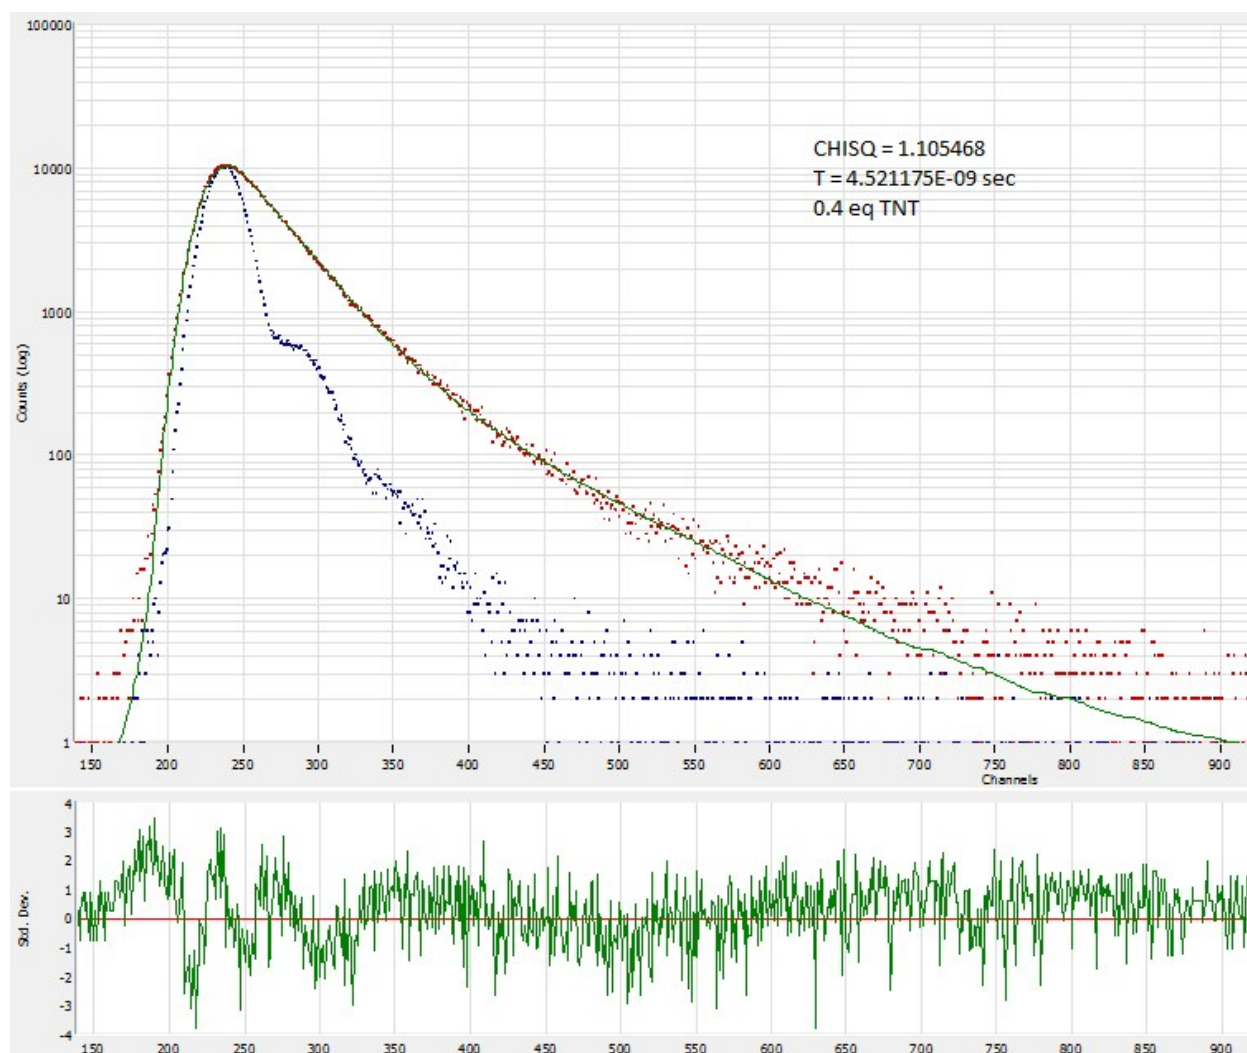

**Fig.S64** Time-resolved fluorescence emission of **4a** adduct with TNT

## Electronic Supplementary Information

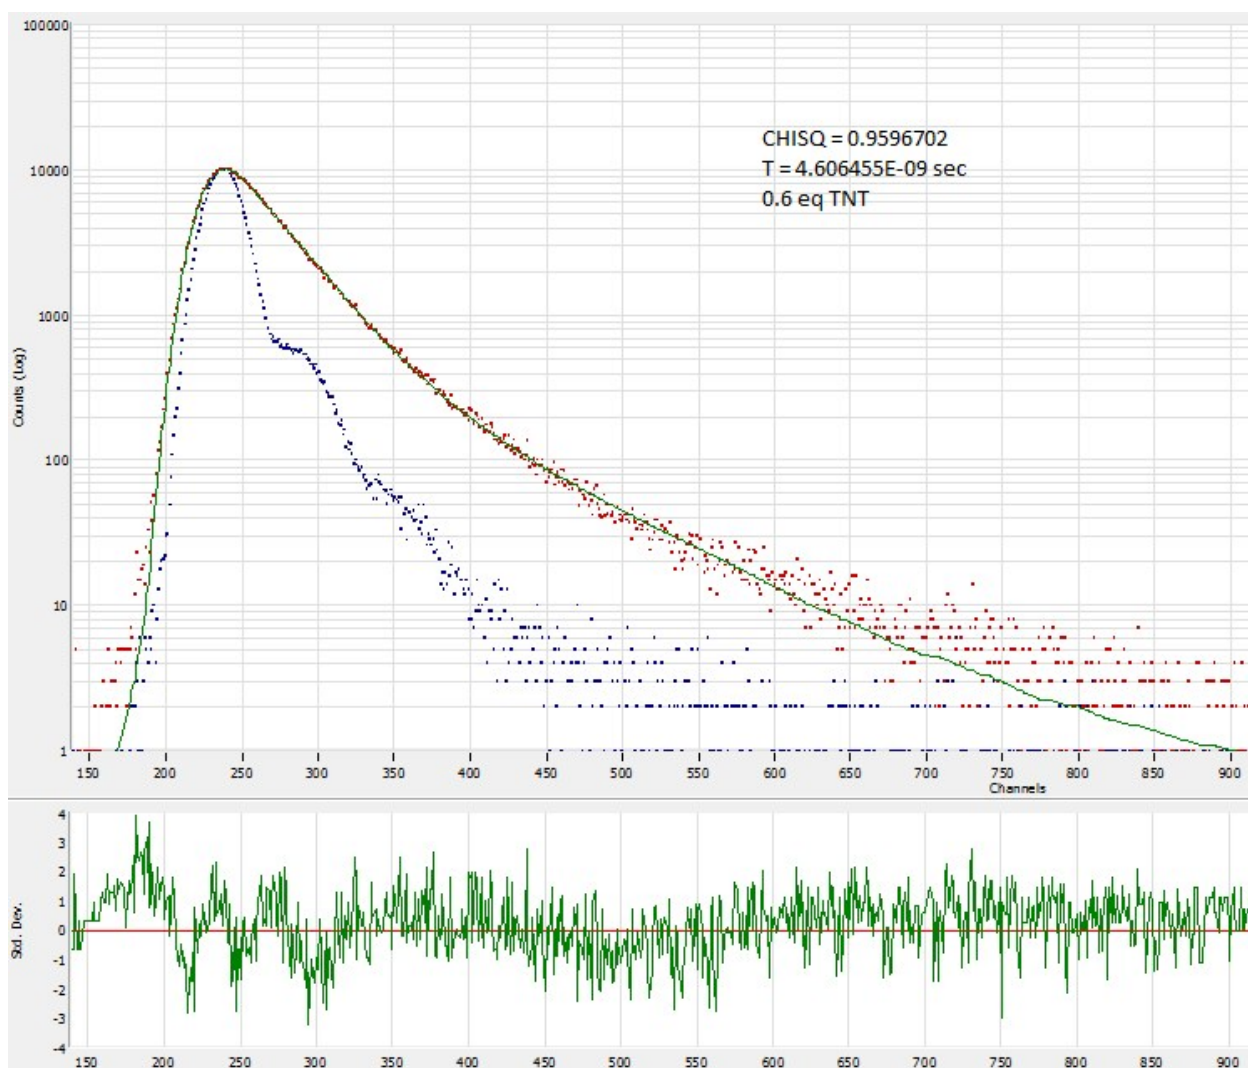

**Fig.S65** Time-resolved fluorescence emission of **4a** adduct with TNT

## Electronic Supplementary Information

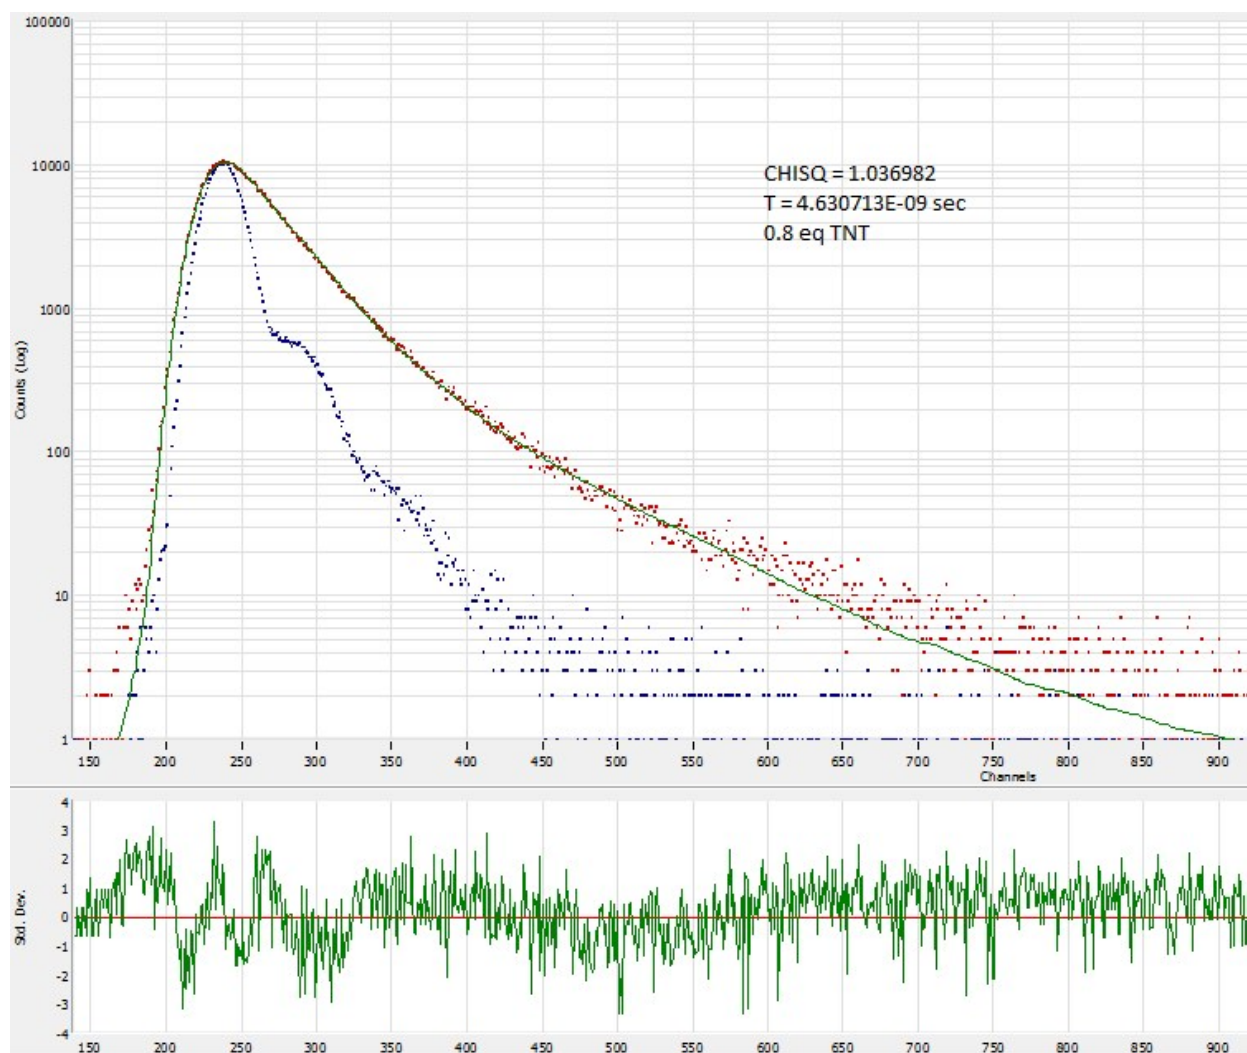

**Fig.S66** Time-resolved fluorescence emission of **4a** adduct with TNT

## Electronic Supplementary Information

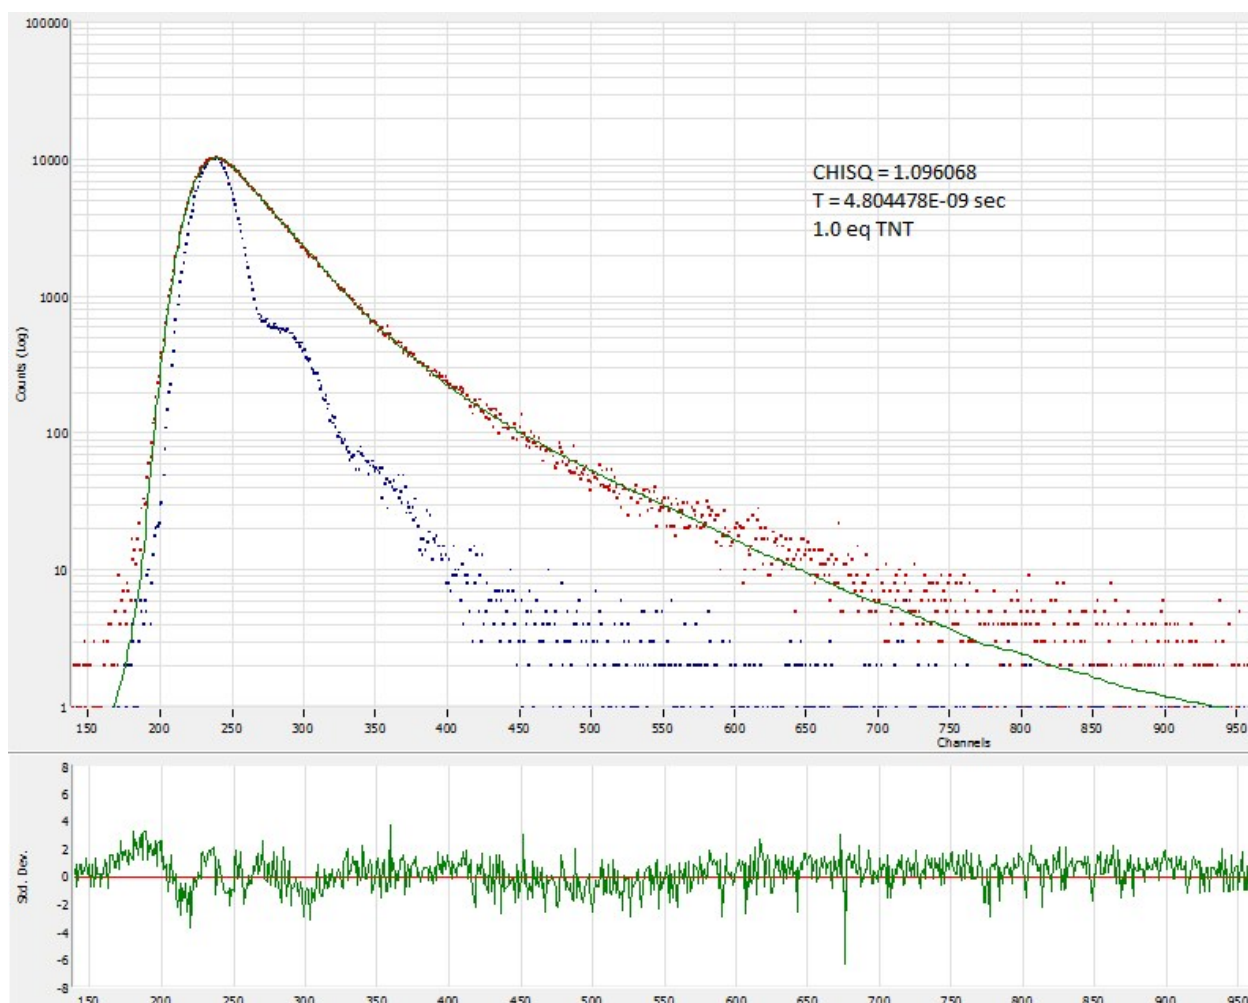

**Fig.S67** Time-resolved fluorescence emission of **4a** adduct with TNT

## Electronic Supplementary Information

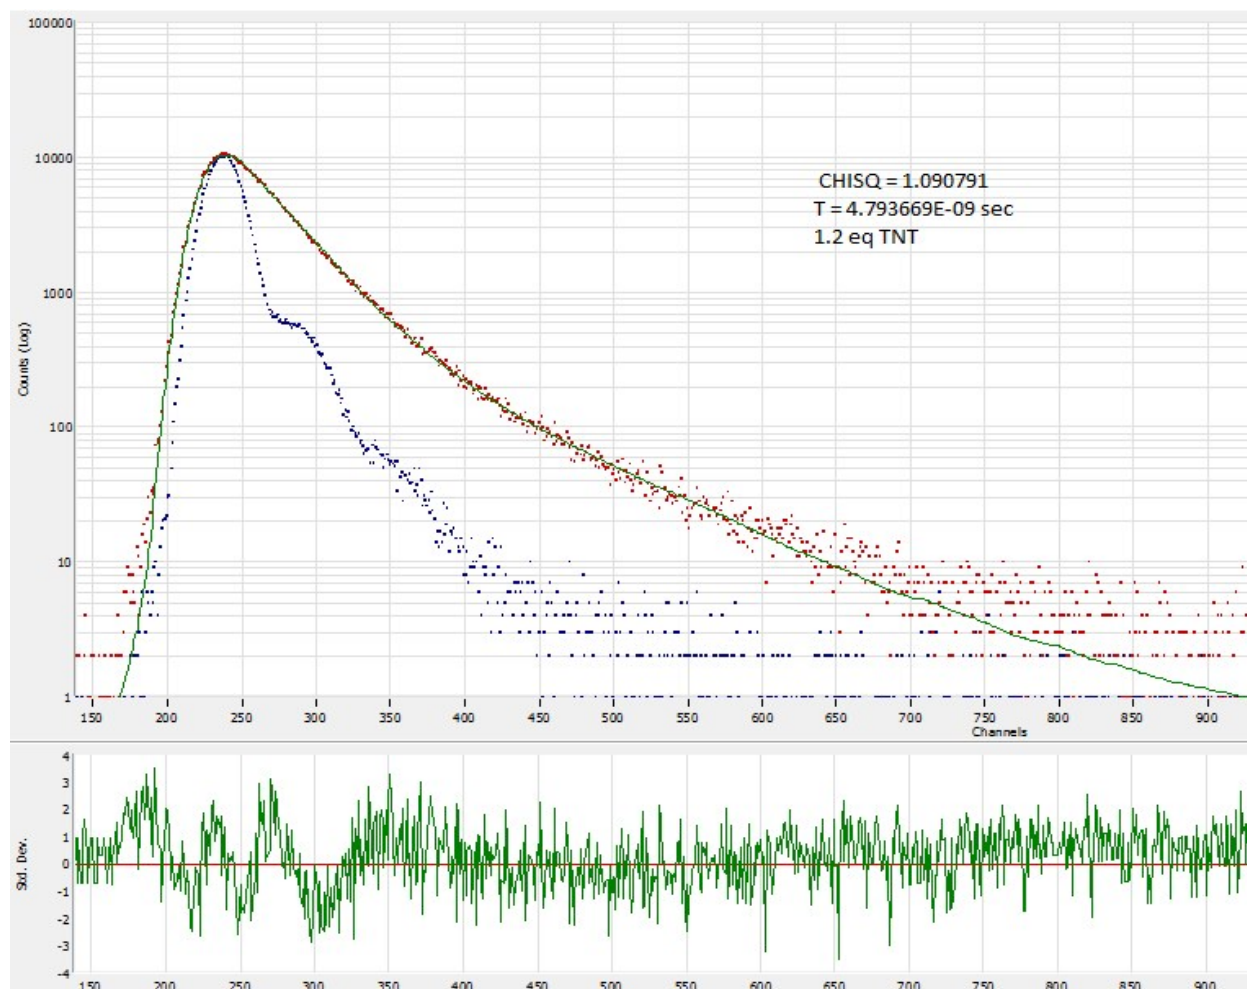

**Fig. S68** Time-resolved fluorescence emission of **4a** adduct with TNT

**Table S2** Fluorescence lifetime data of pure **4a** fluorophore at different mole ratios of RDX

| Mole ratio vs RDX | 4a fluorophore (ns) |
|-------------------|---------------------|
|                   | $\tau$              |
| 0,0               | 4,780               |
| 1:0,2             | 4,848               |
| 1:0,4             | 5,030               |
| 1:0,6             | 4,853               |
| 1:0,8             | 4,873               |
| 1:1,0             | 5,096               |
| 1:1,2             | 5,055               |

## Electronic Supplementary Information

|    | 0 eq        | 0.2 eq      | 0.4 eq      | 0.6 eq      | 0.8 eq      | 1.0 eq      | 1.2 eq      |
|----|-------------|-------------|-------------|-------------|-------------|-------------|-------------|
| A  | 7,1327E-01  | 7,5777E-01  | 7,2002E-01  | 7,0253E-01  | 6,6691E-01  | 7,5615E-01  | 7,4626E-01  |
| B1 | -9,6570E-02 | -9,7154E-02 | -8,9702E-02 | -1,0262E-01 | -9,7272E-02 | -9,4523E-02 | -9,4775E-02 |
| B2 | 8,8529E-02  | 8,9827E-02  | 8,2111E-02  | 9,0933E-02  | 8,6985E-02  | 8,5049E-02  | 8,3076E-02  |
| B3 | 3,2474E-03  | 3,7888E-03  | 3,3031E-03  | 3,3421E-03  | 3,2048E-03  | 3,5147E-03  | 3,5206E-03  |
| T1 | 2,9035E-10  | 2,9863E-10  | 2,6329E-10  | 2,8621E-10  | 2,6715E-10  | 2,5702E-10  | 2,7255E-10  |
| T2 | 1,3568E-09  | 1,3839E-09  | 1,4260E-09  | 1,3688E-09  | 1,3886E-09  | 1,4338E-09  | 1,4317E-09  |
| T3 | 4,7803E-09  | 4,8476E-09  | 5,0301E-09  | 4,8532E-09  | 4,8727E-09  | 5,0957E-09  | 5,0551E-09  |

$$F(x) = A + B1 * \exp\left(-\frac{x}{T1}\right) + B2 * \exp\left(-\frac{x}{T2}\right) + B3 * \exp\left(-\frac{x}{T3}\right)$$

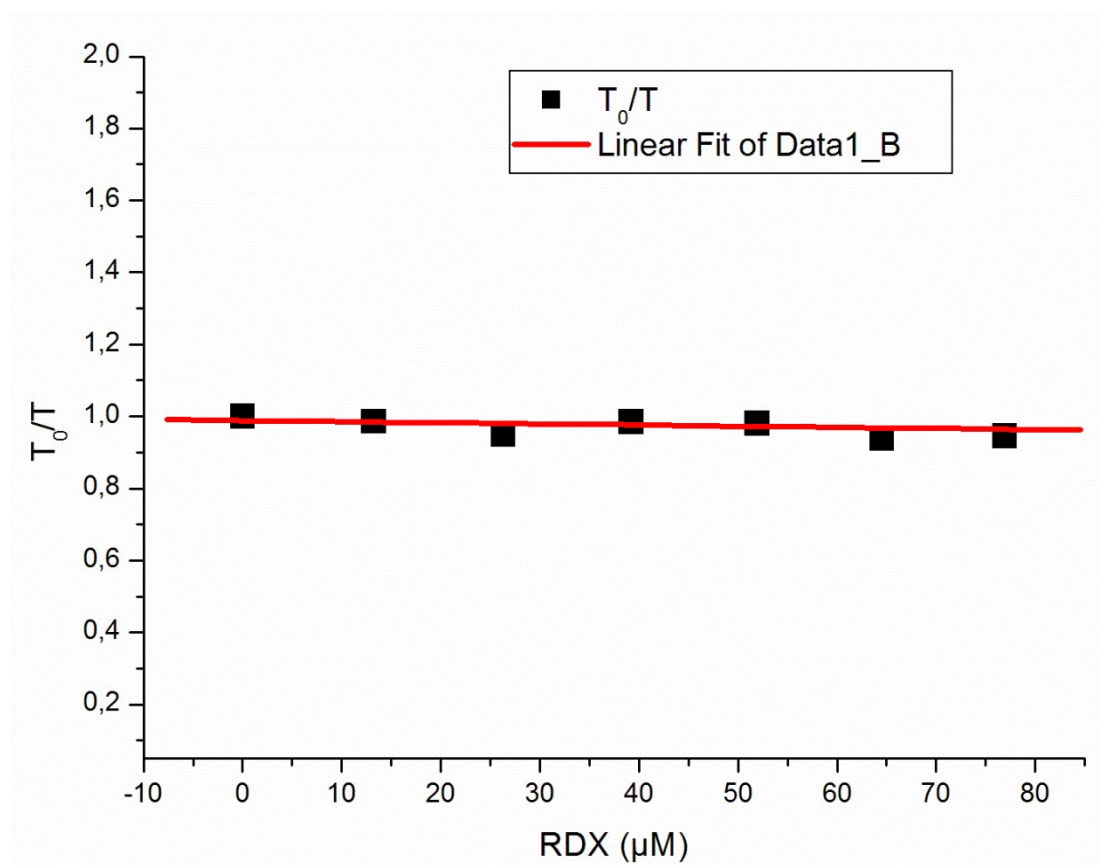

**Fig.S69**  $T_0/T$  at 410 nm ( $\lambda_{ex}=375$  nm) of **4a** as a function of the concentration of the quencher (RDX)

## Electronic Supplementary Information

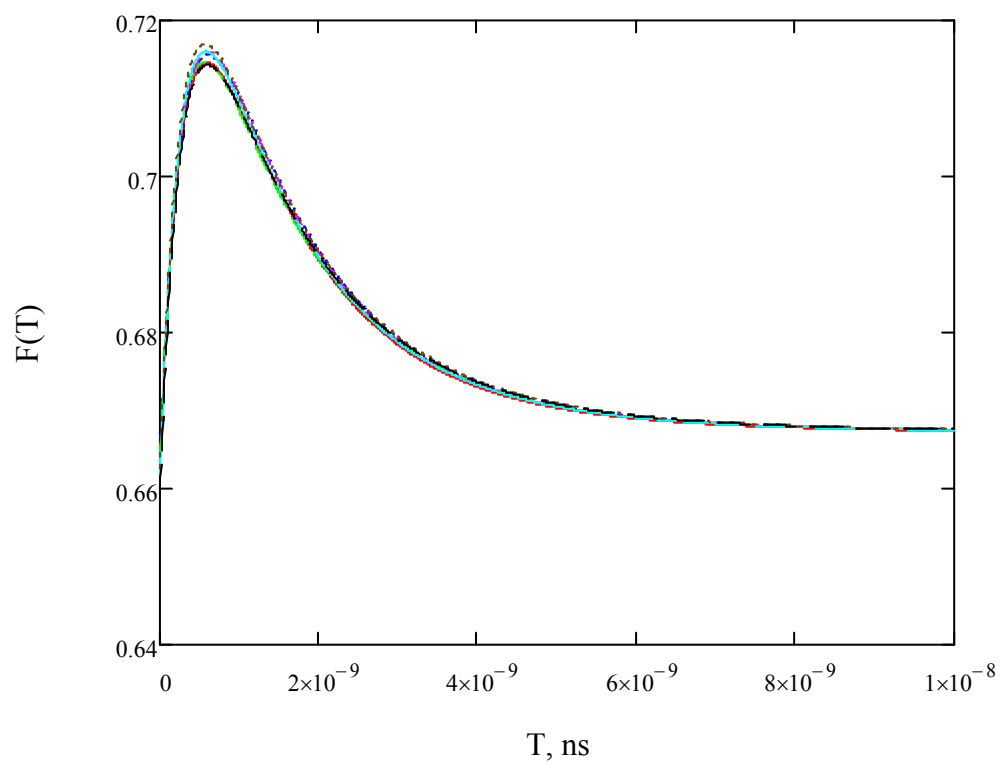

**Fig.S70**  $F(T)$  of **4a** as a function of the concentration of the lifetime ( $T$ )



## Electronic Supplementary Information

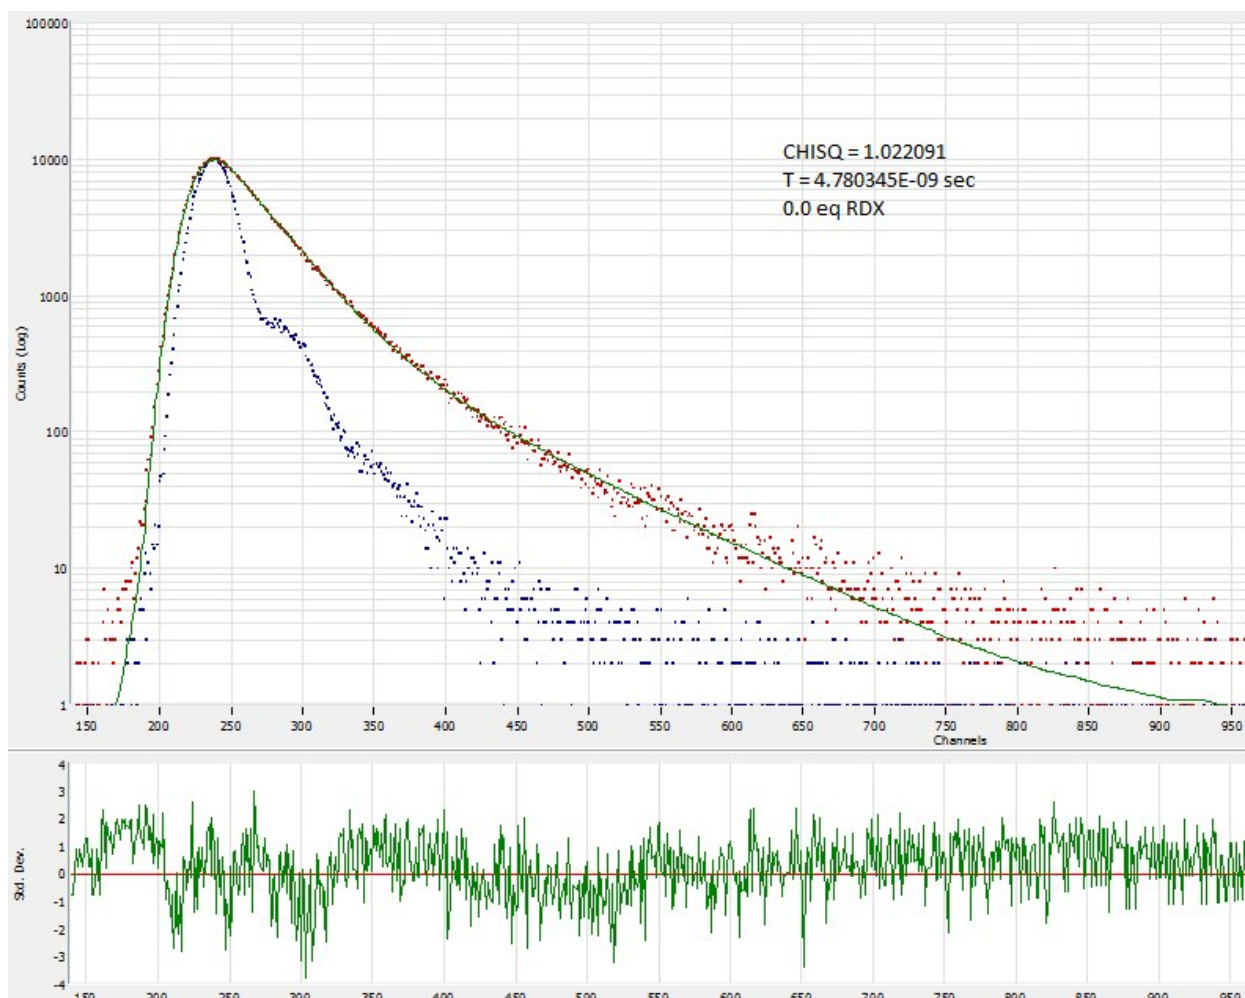

**Fig.S71** Time-resolved fluorescence emission of **4a** adduct with RDX

## Electronic Supplementary Information

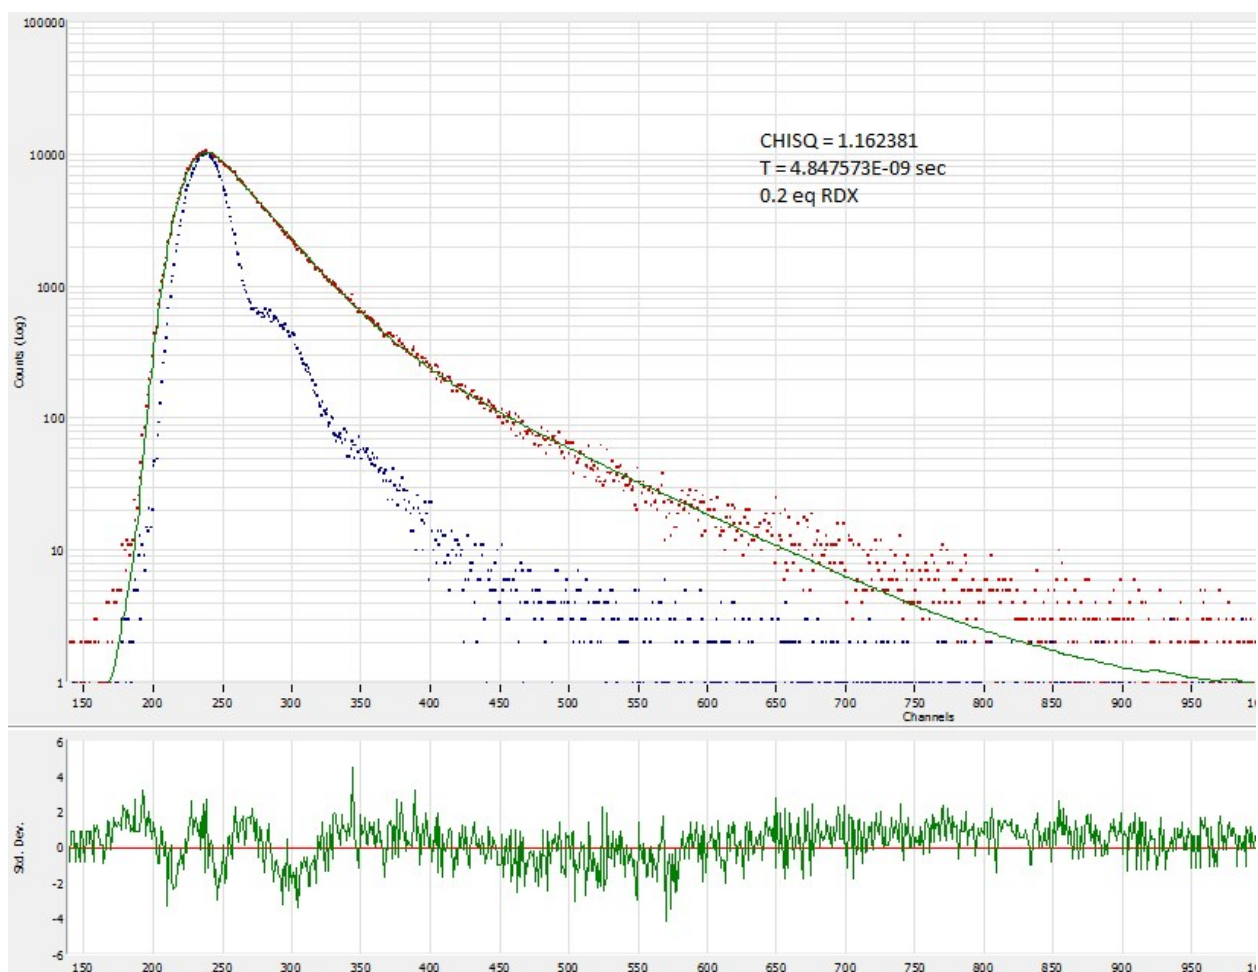

**Fig.S72** Time-resolved fluorescence emission of **4a** adduct with RDX

## Electronic Supplementary Information

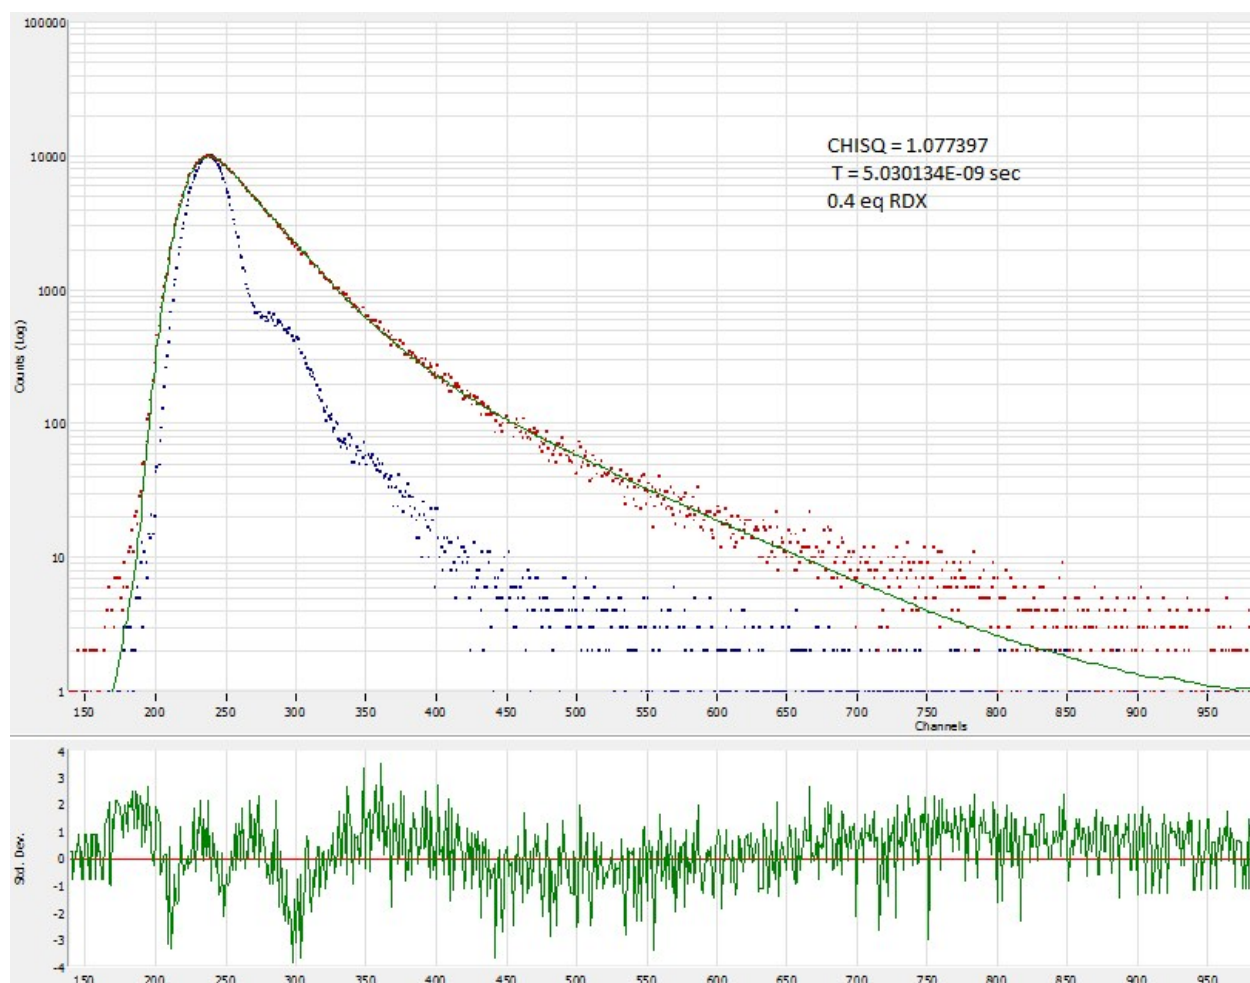

**Fig.S73** Time-resolved fluorescence emission of **4a** adduct with RDX

## Electronic Supplementary Information

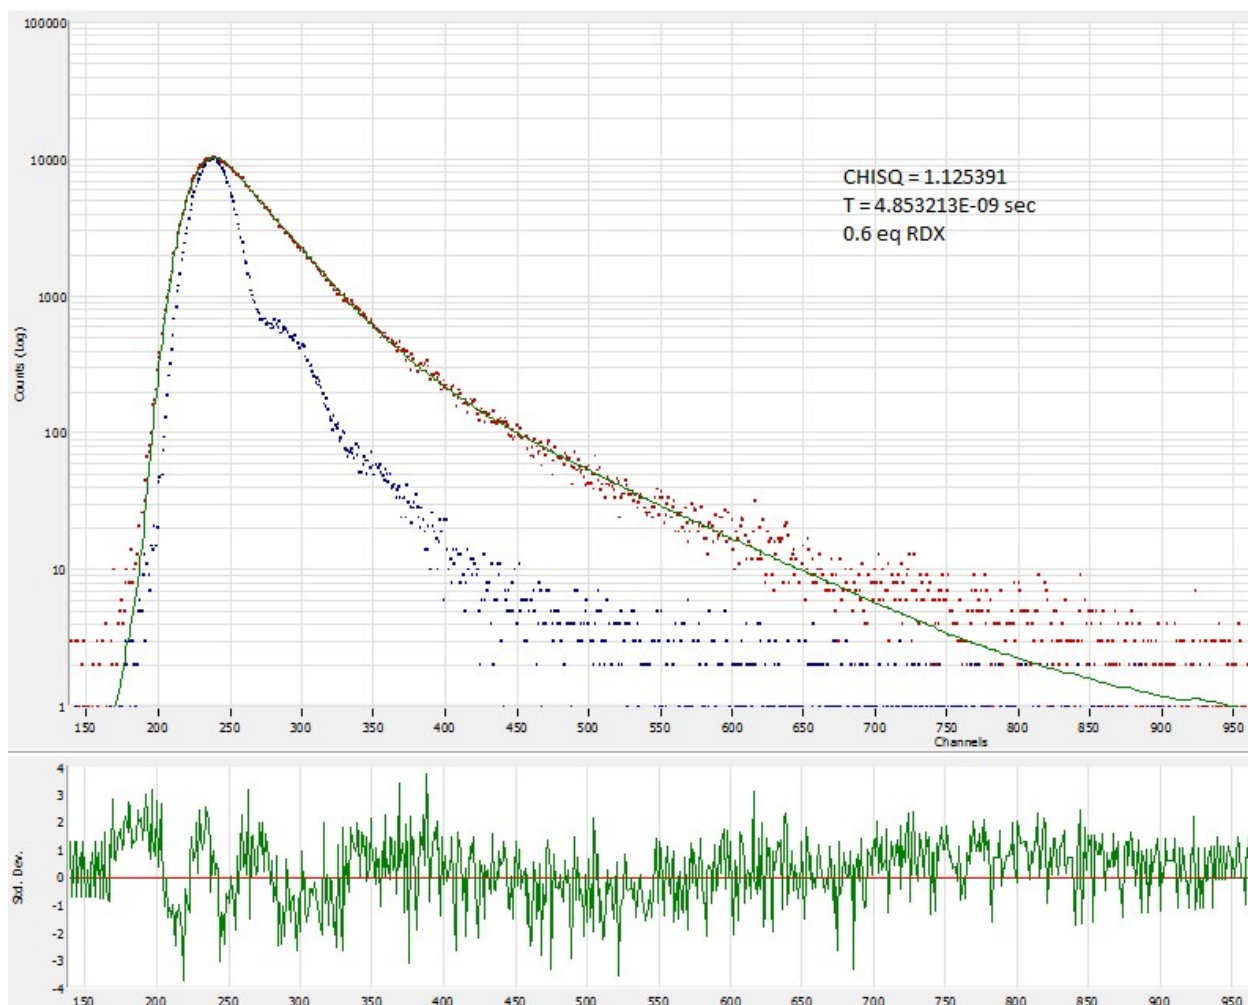

**Fig.S74** Time-resolved fluorescence emission of **4a** adduct with RDX

## Electronic Supplementary Information

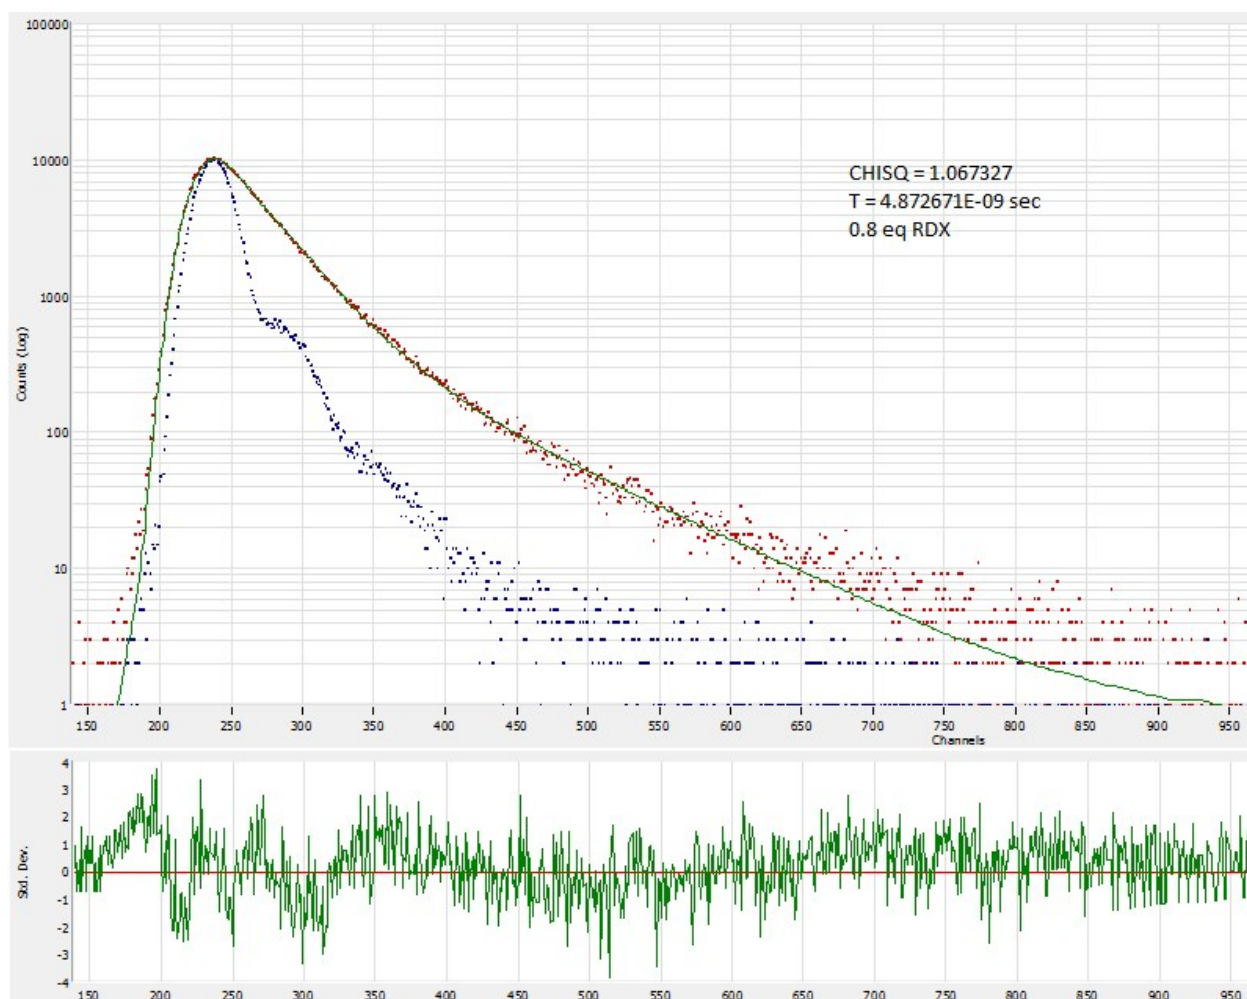

**Fig.S75** Time-resolved fluorescence emission of **4a** adduct with RDX

## Electronic Supplementary Information

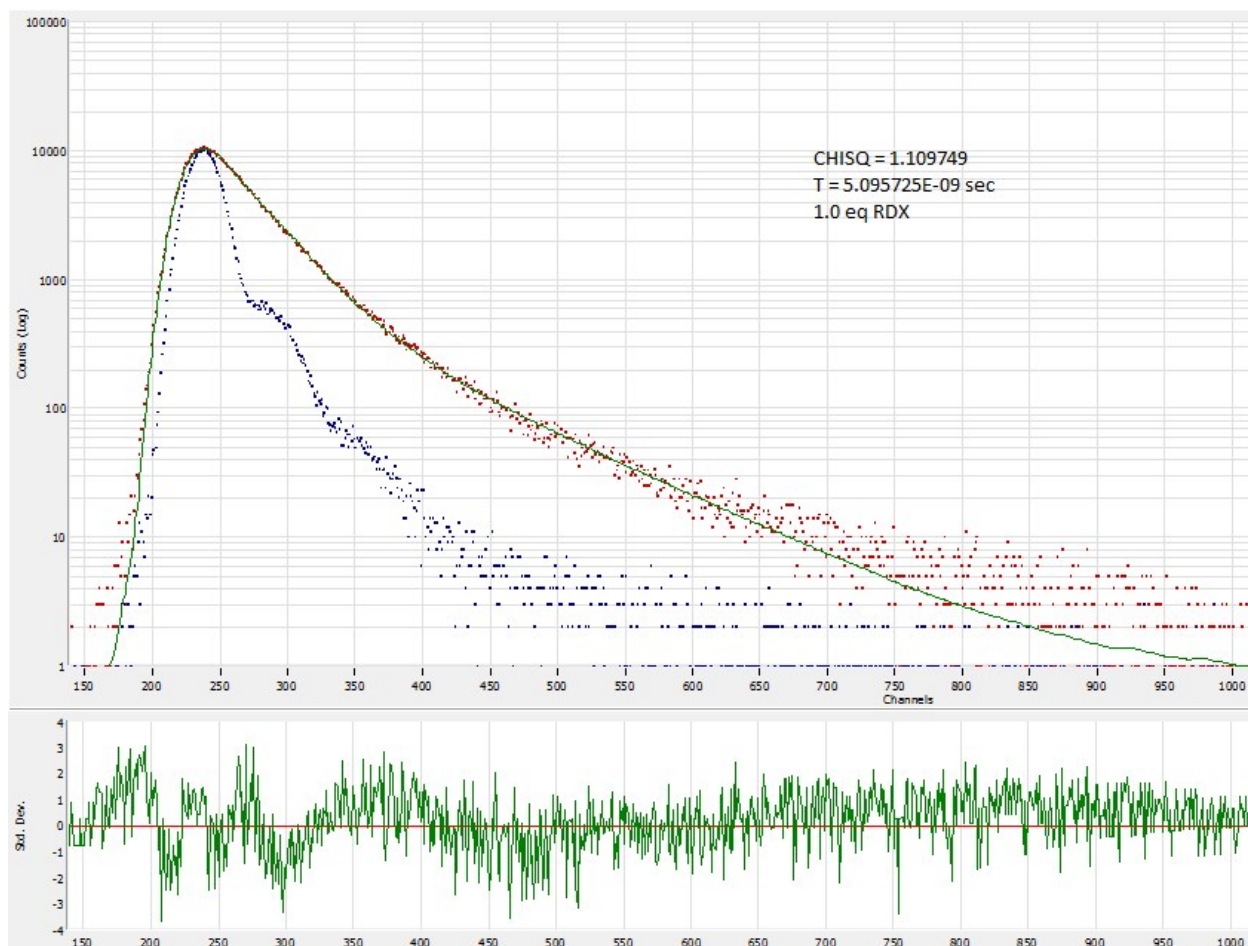

**Fig.S76** Time-resolved fluorescence emission of **4a** adduct with RDX

## Electronic Supplementary Information

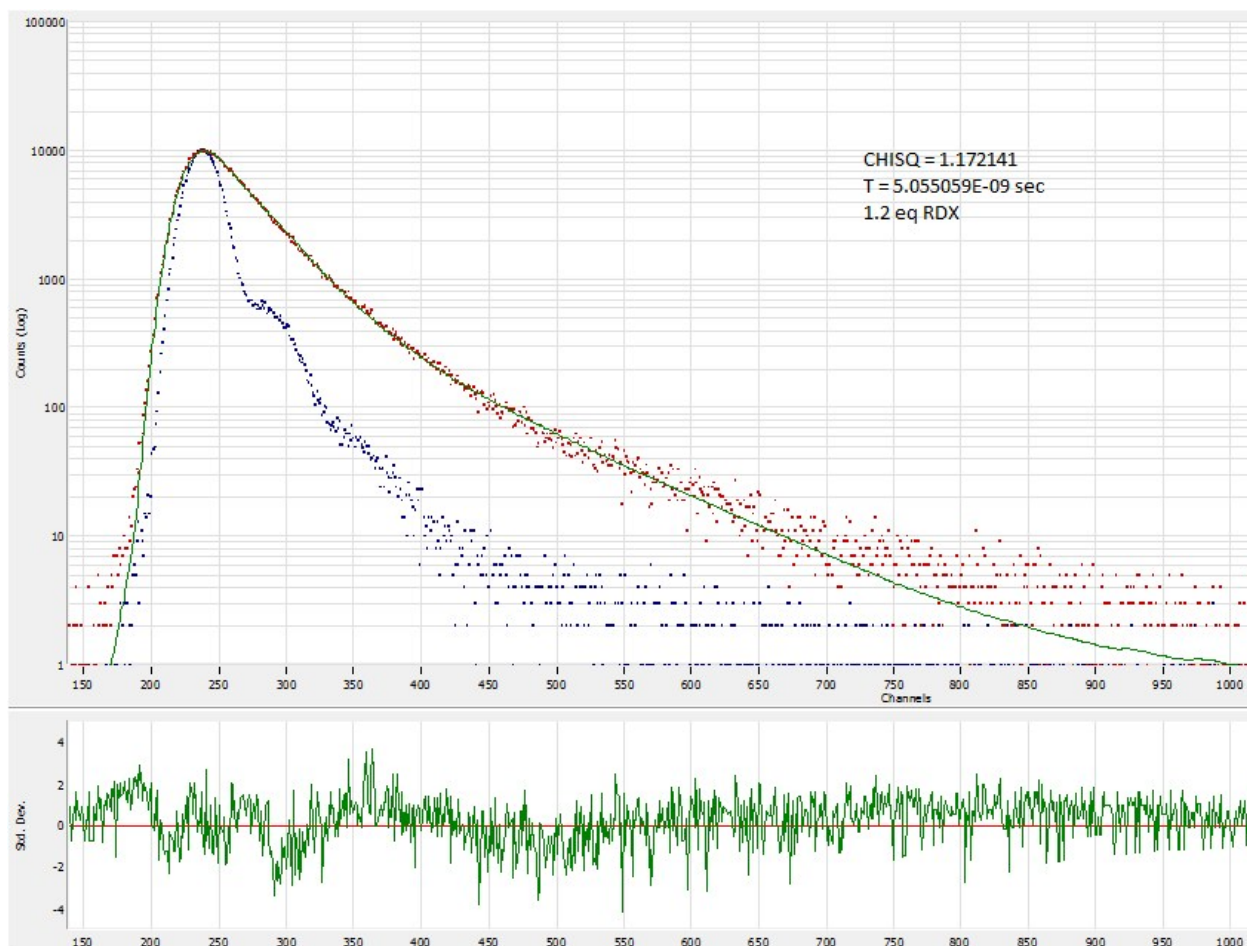

**Fig.S77** Time-resolved fluorescence emission of **4a** adduct with RDX

## Electronic Supplementary Information

### Fluorescence quenching in polymer matrices

The THF solutions of sensors **3,4a-c** in polyurethane (*c.a.* 5 % w/w) were solution-casted in wells of aluminium chips to form sensor films. After evaporation of the solvent these chips were exposed to vapours of components of nitro-explosives (TNT, 2,4-DNT and RDX) at equilibrium.

The blank samples were prepared by placing the scotch-tape film over the wells to prevent the penetration of the vapors of nitro-explosives.



**$^1\text{H}$  &  $^{13}\text{C}$  NMR Spectra of fluorophores 2,3,4a,4b,4c**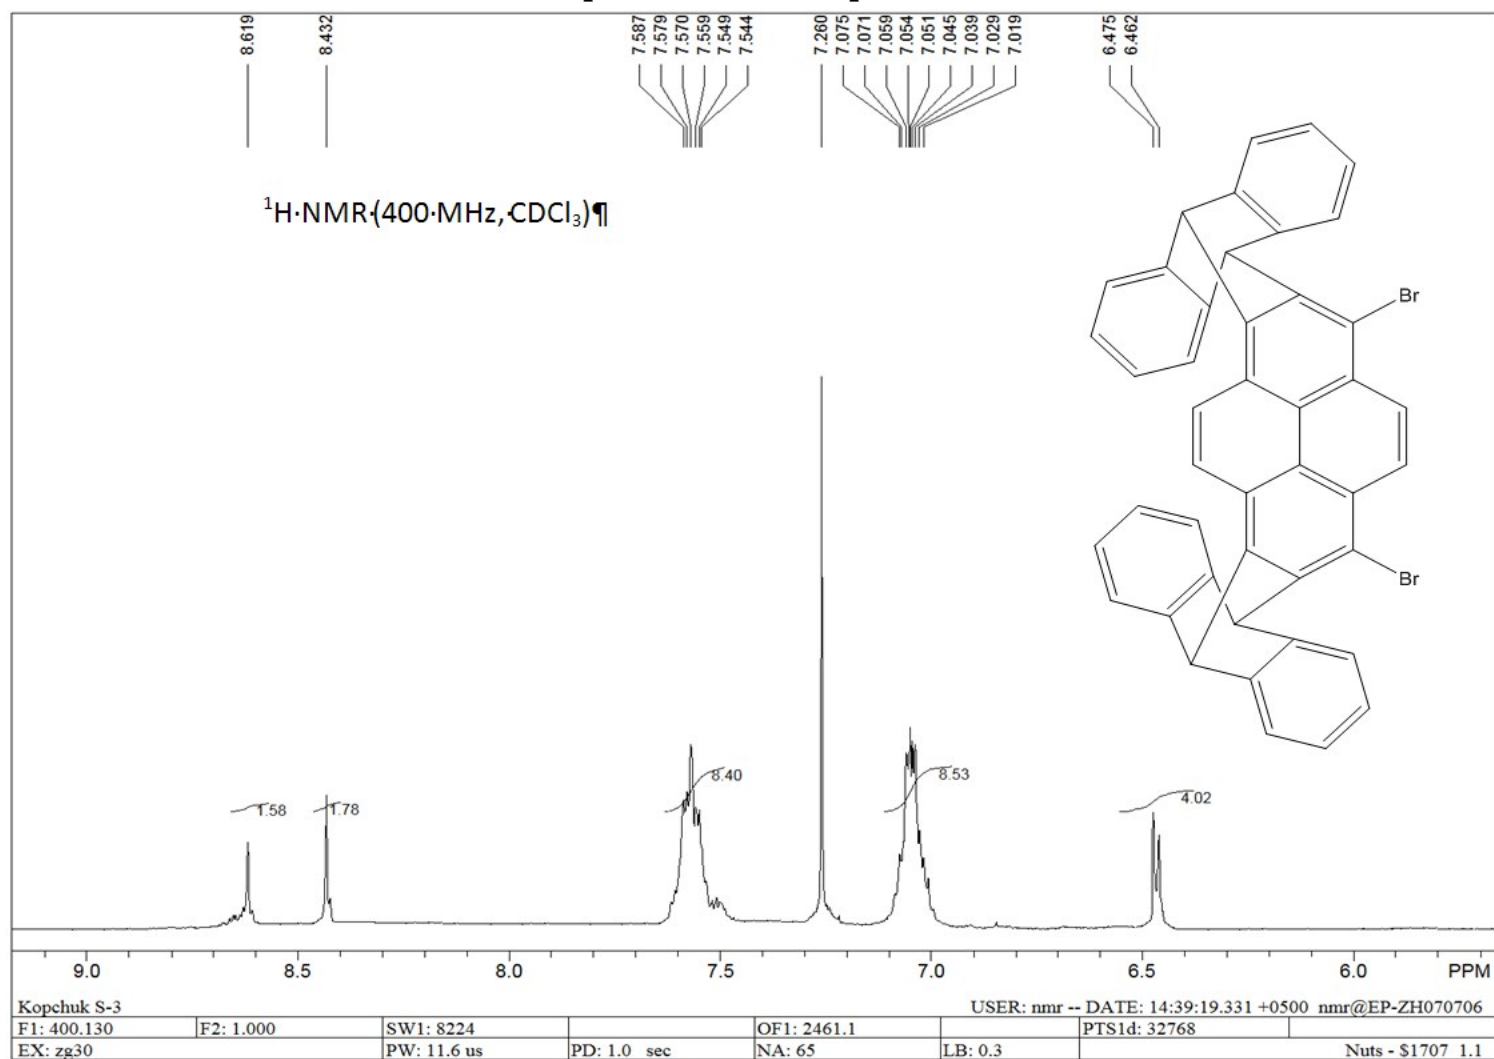**Fig. S78**  $^1\text{H}$  NMR (400 MHz) of iptycene **2**

Electronic Supplementary Information

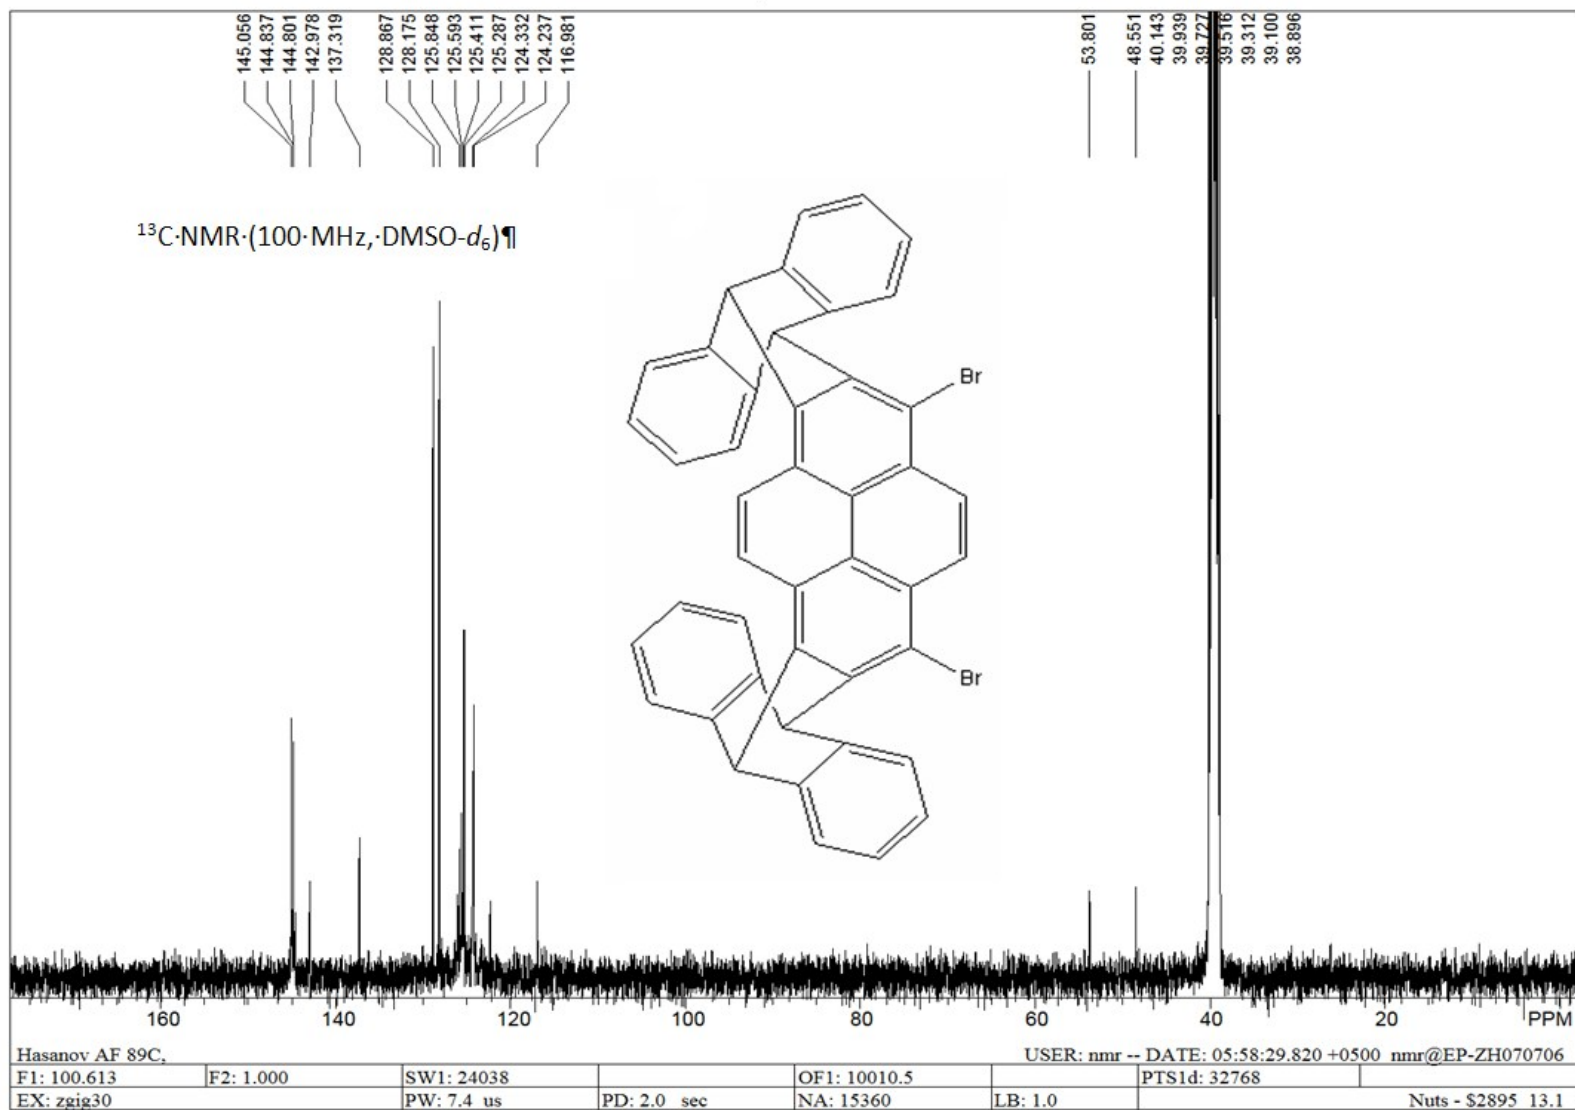

Fig. S79  $^{13}\text{C}$  NMR (100 MHz) of iptycene 2

Electronic Supplementary Information

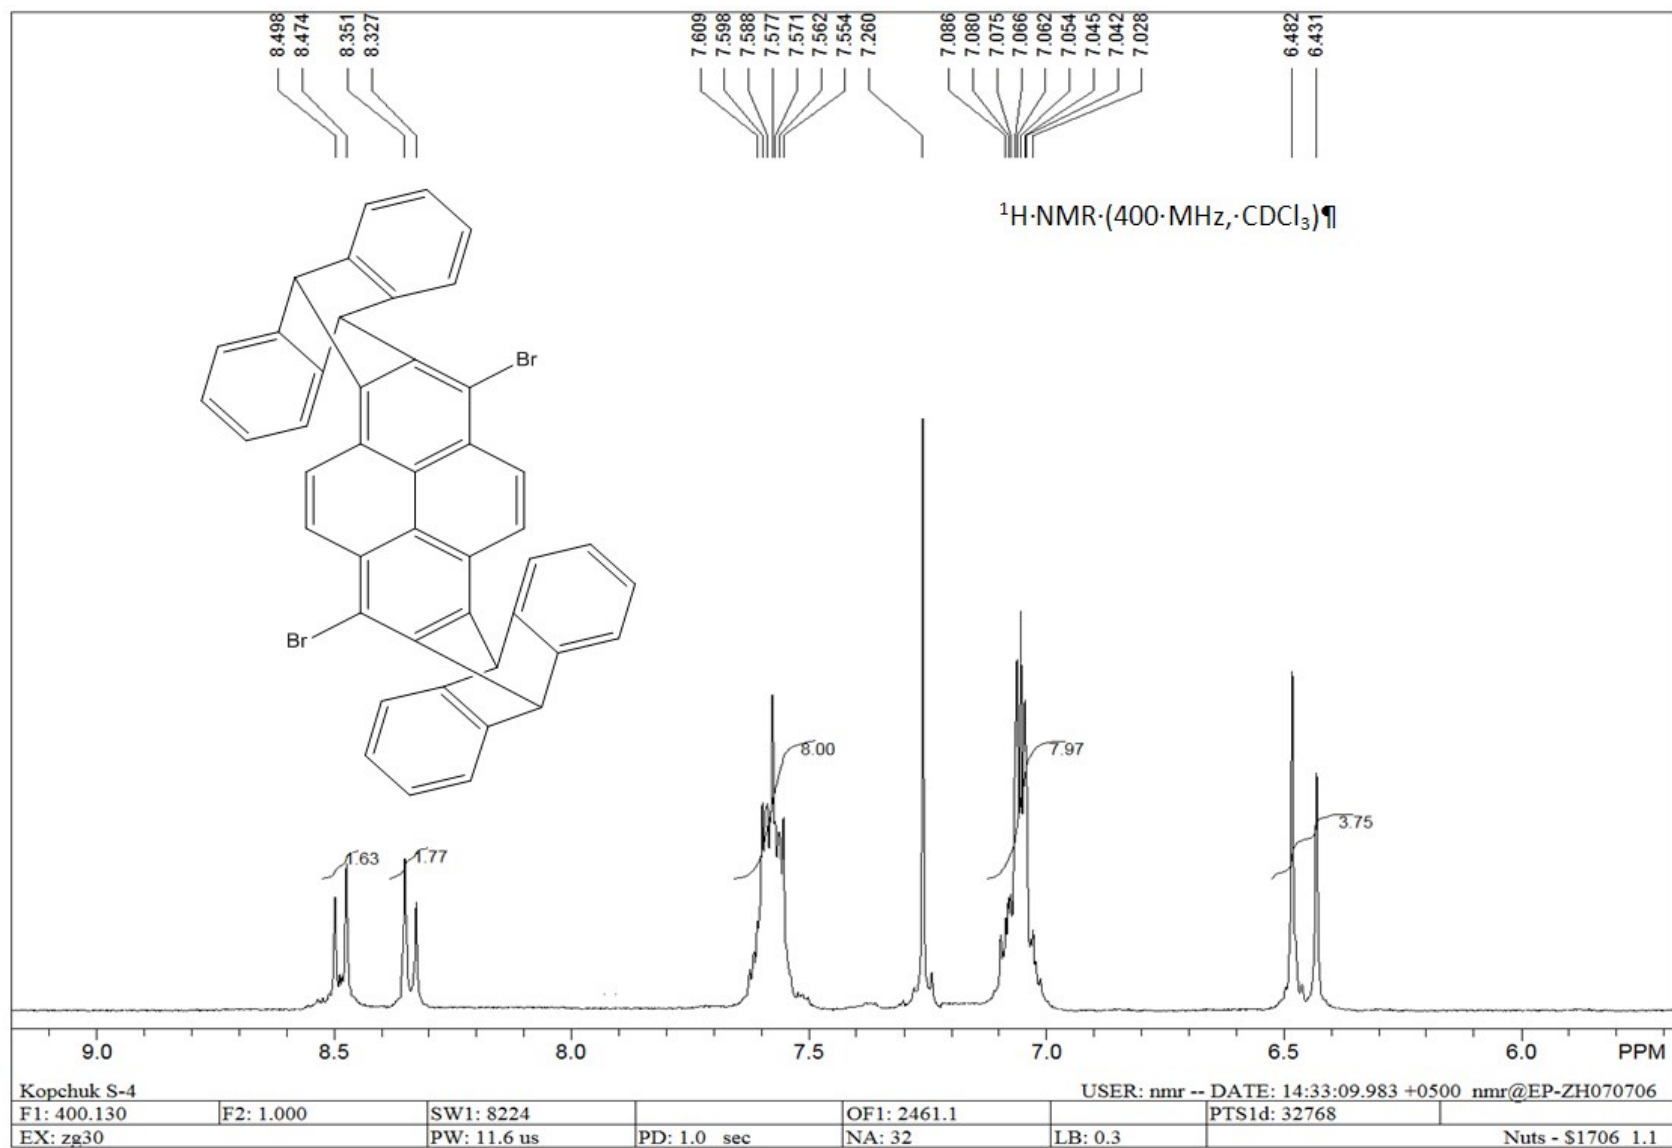

Fig. S80 <sup>1</sup>H NMR (400 MHz) of iptycene 3

Electronic Supplementary Information

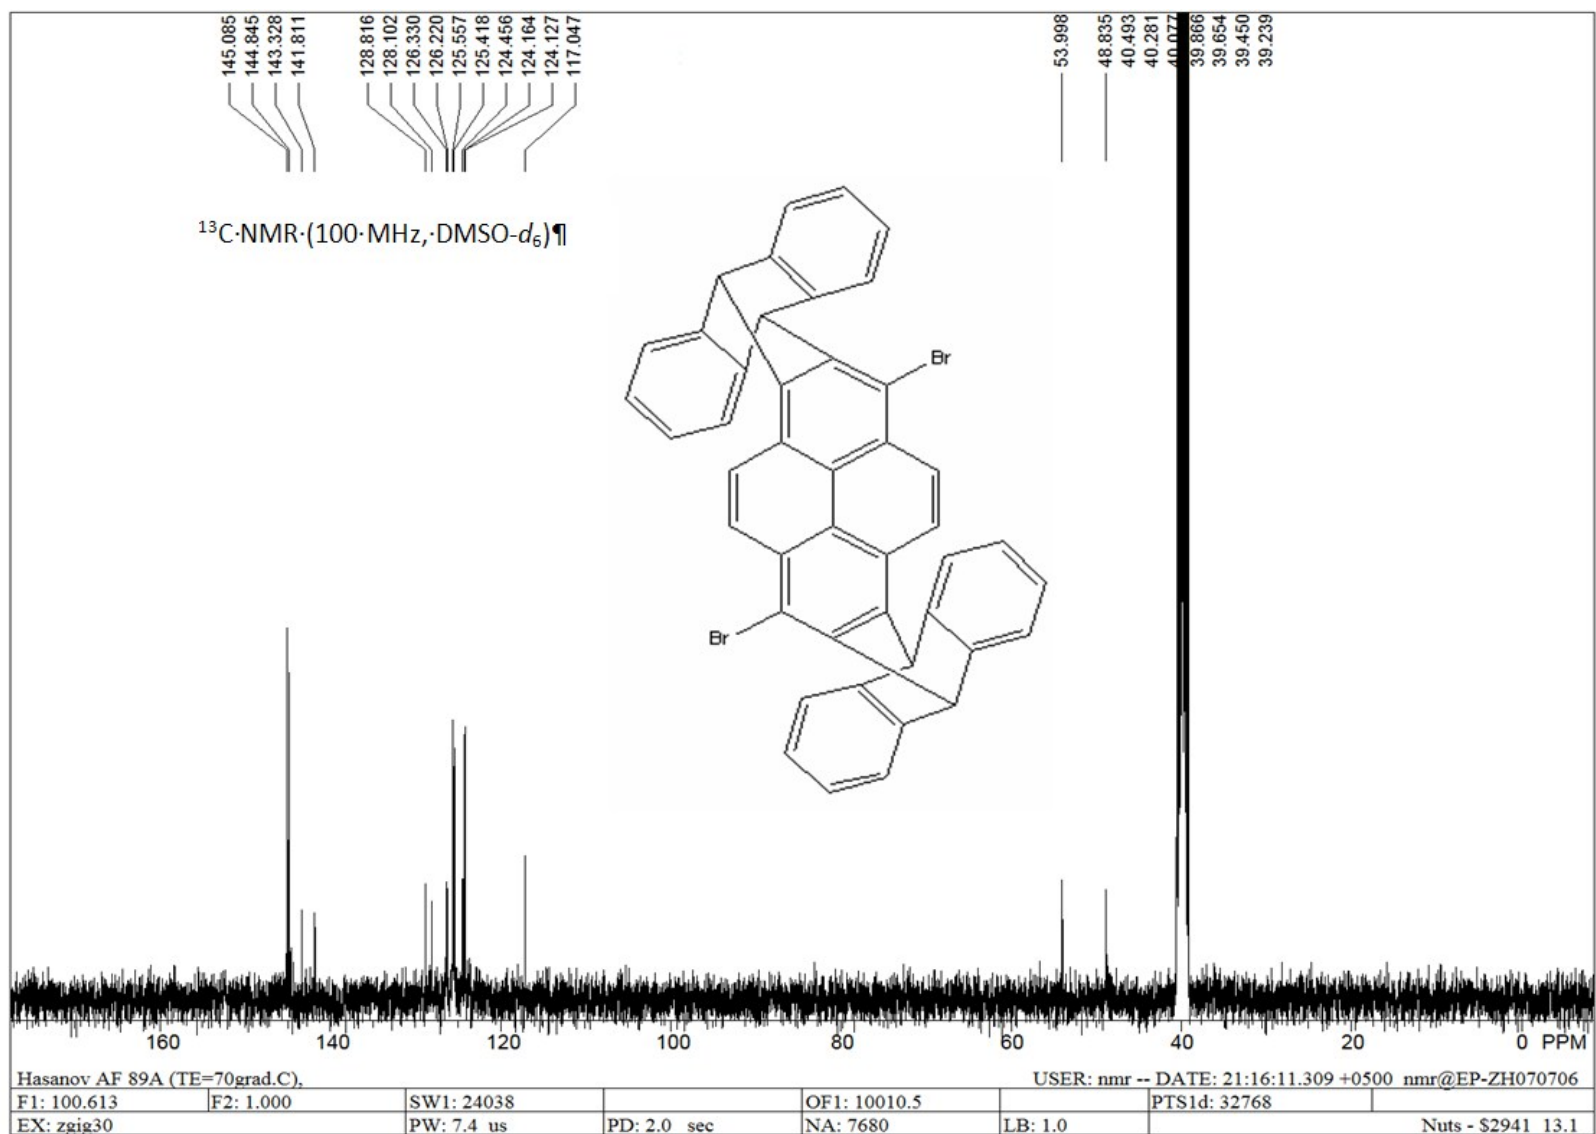

Fig. S81 <sup>13</sup>C NMR (100 MHz) spectrum of fluorophore **3**

Electronic Supplementary Information

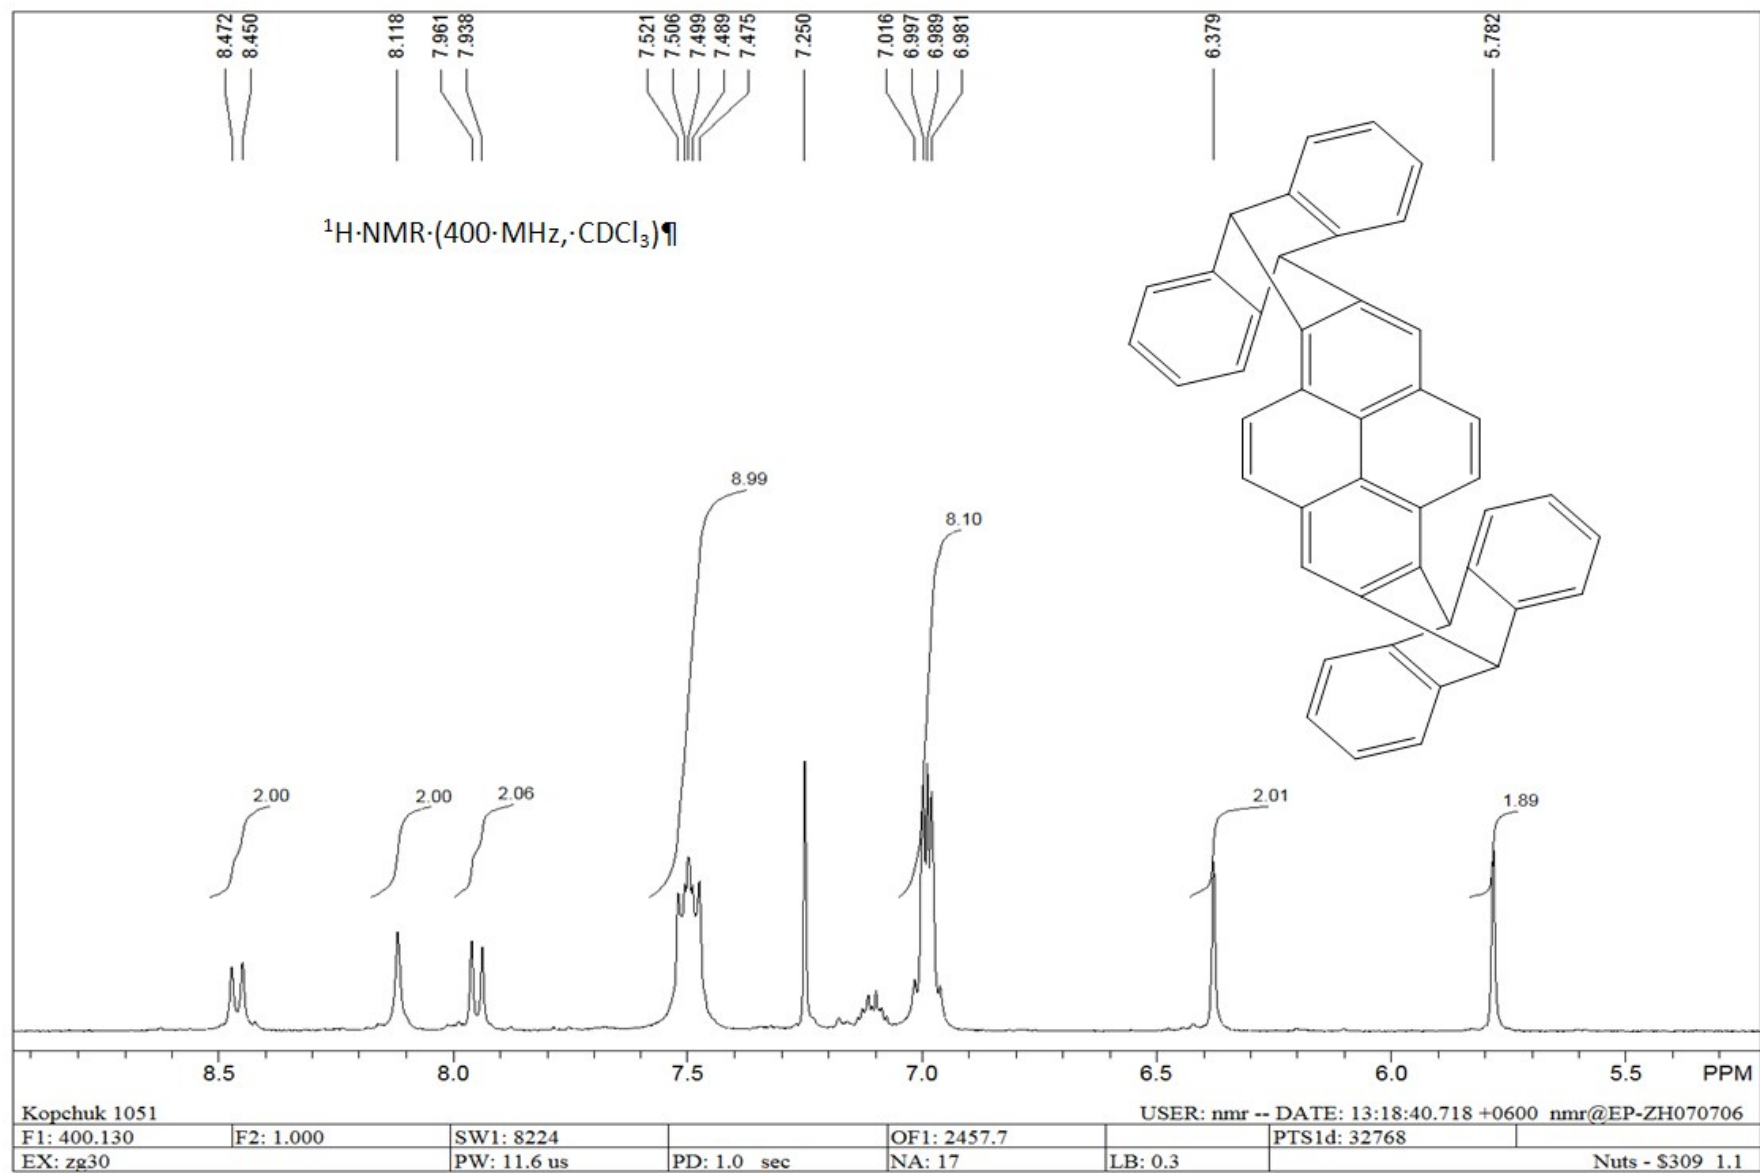

Fig. S82 <sup>1</sup>H NMR (400 MHz) of iptycene 4a

Electronic Supplementary Information

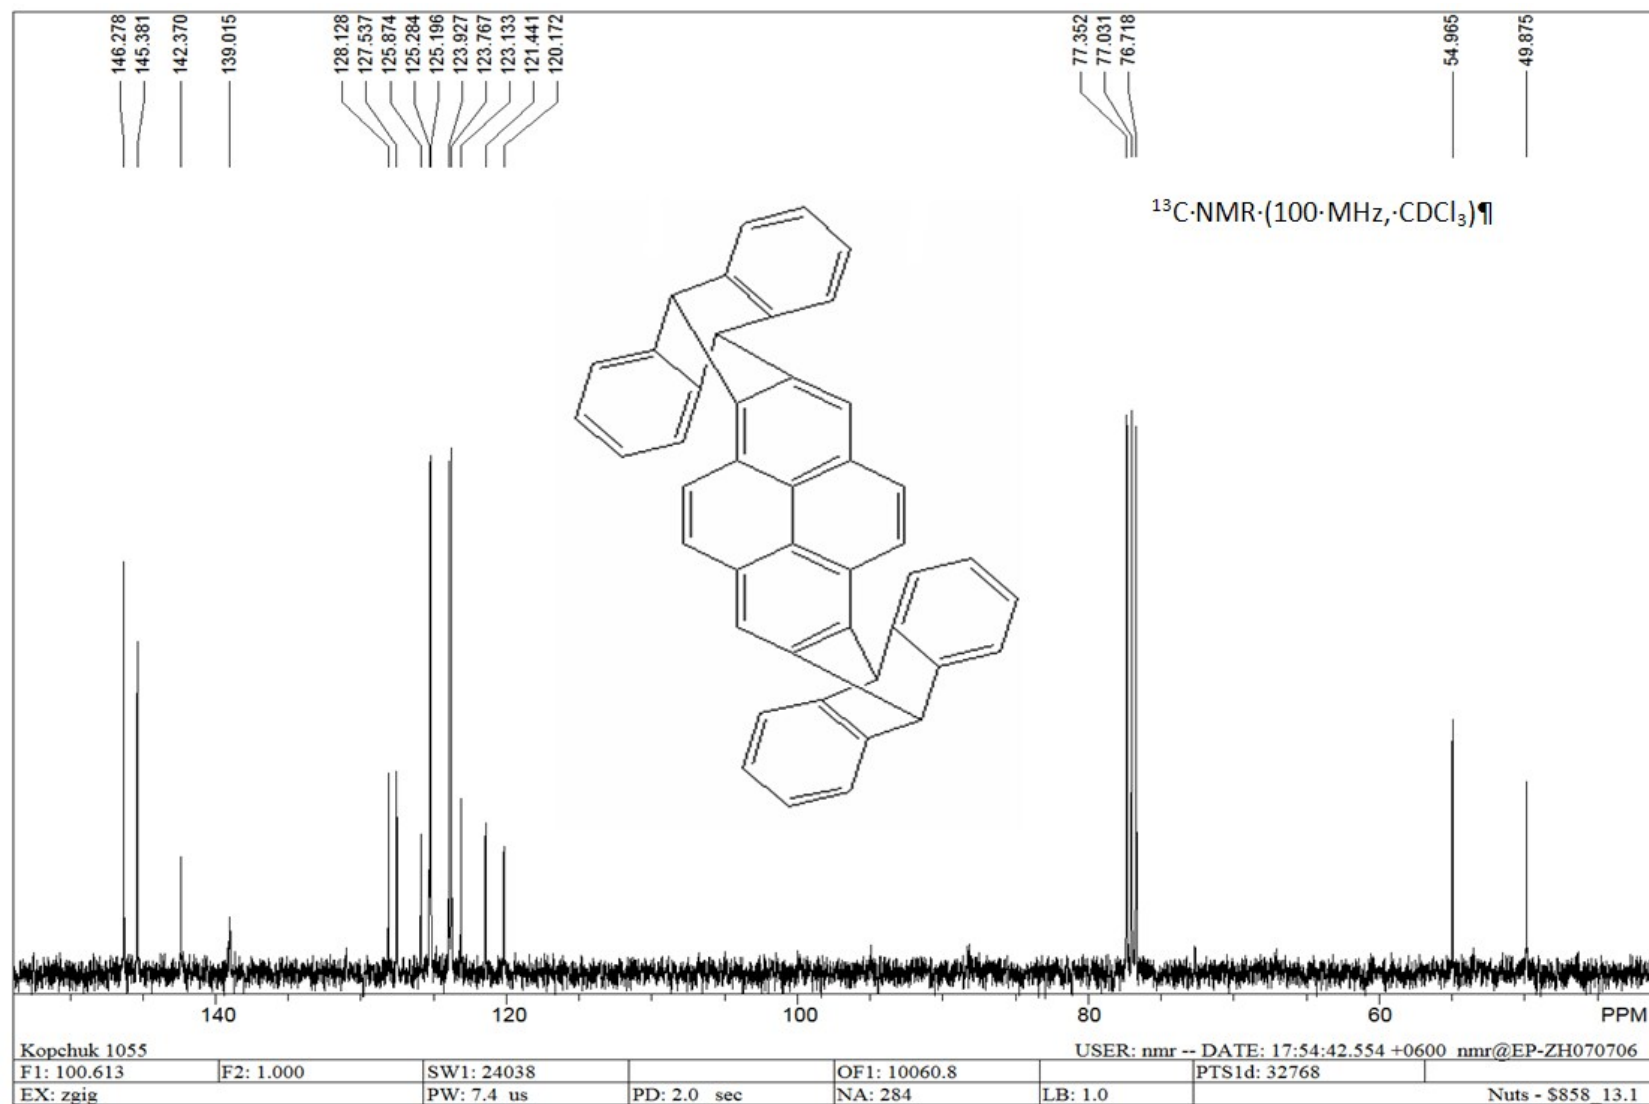

Fig. S83 <sup>13</sup>C NMR (100 MHz) iptycene **4a**

Electronic Supplementary Information

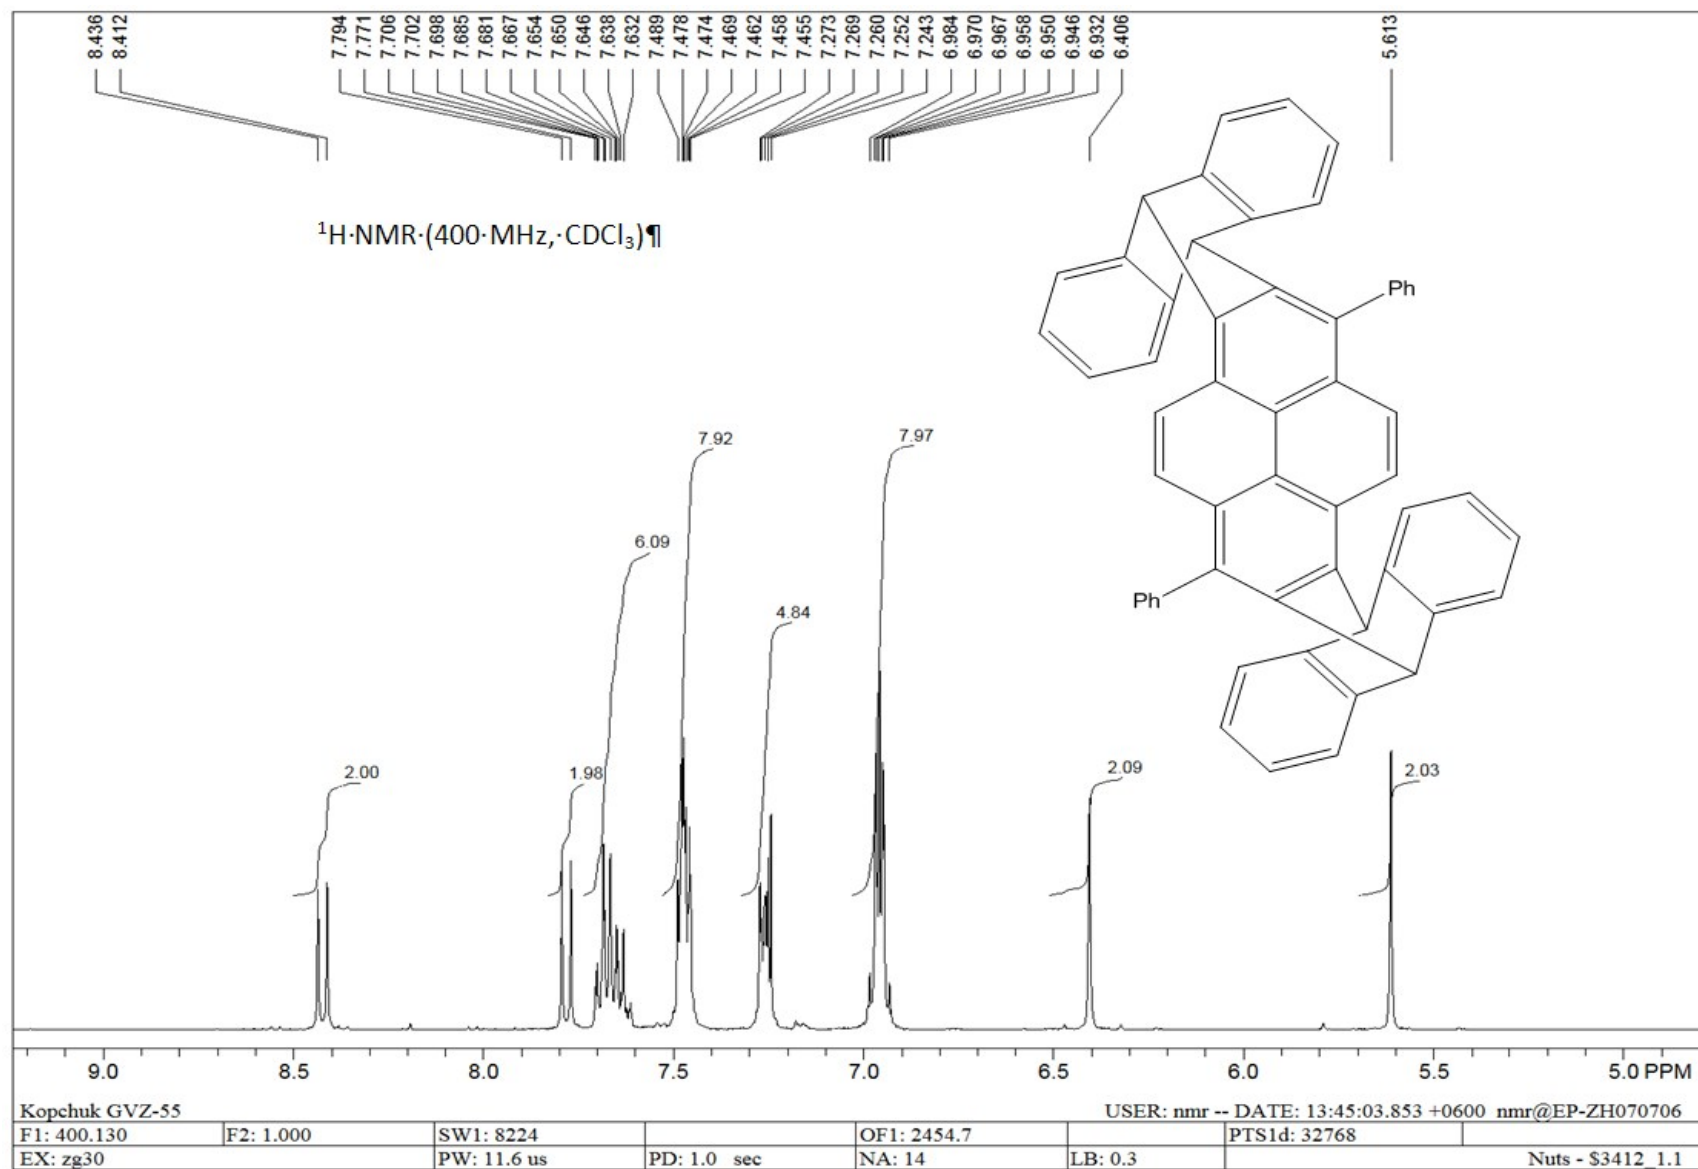

Fig. S84 <sup>1</sup>H NMR (400 MHz) iptycene **4b**

Electronic Supplementary Information

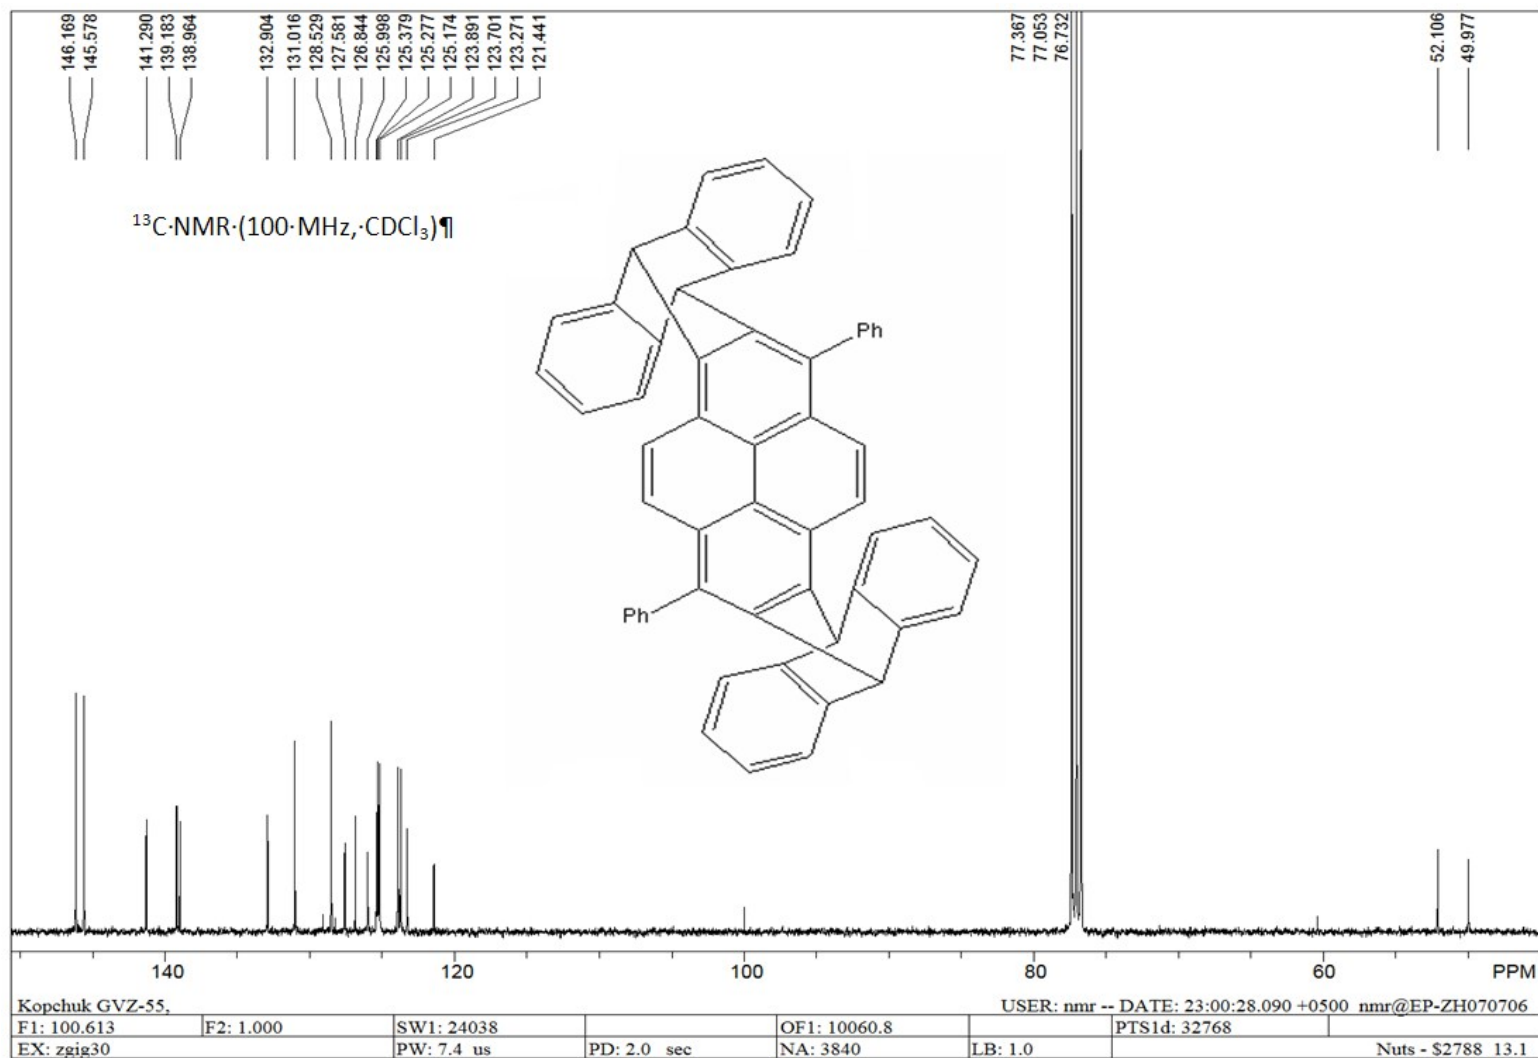

Fig. S85 <sup>13</sup>C NMR (100 MHz) of iptycene **4b**



Electronic Supplementary Information

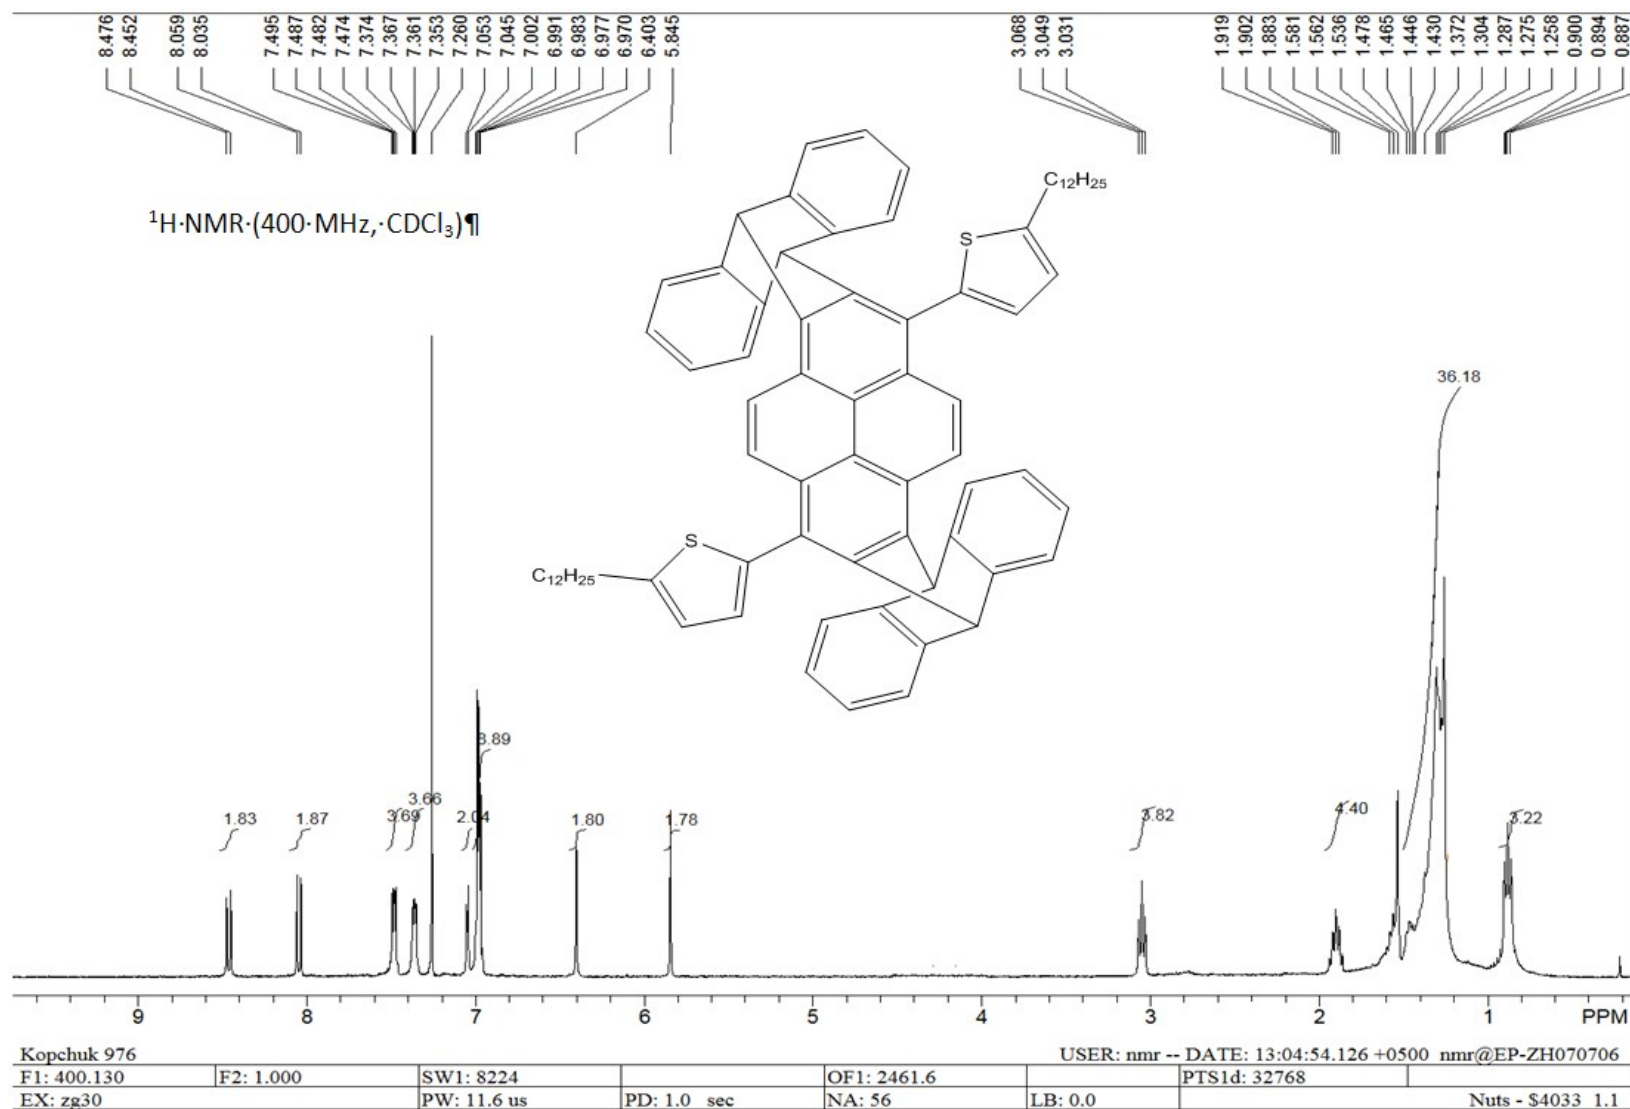

Fig. S86  $^1\text{H}$  NMR (400 MHz) of iptycene 4c

Electronic Supplementary Information

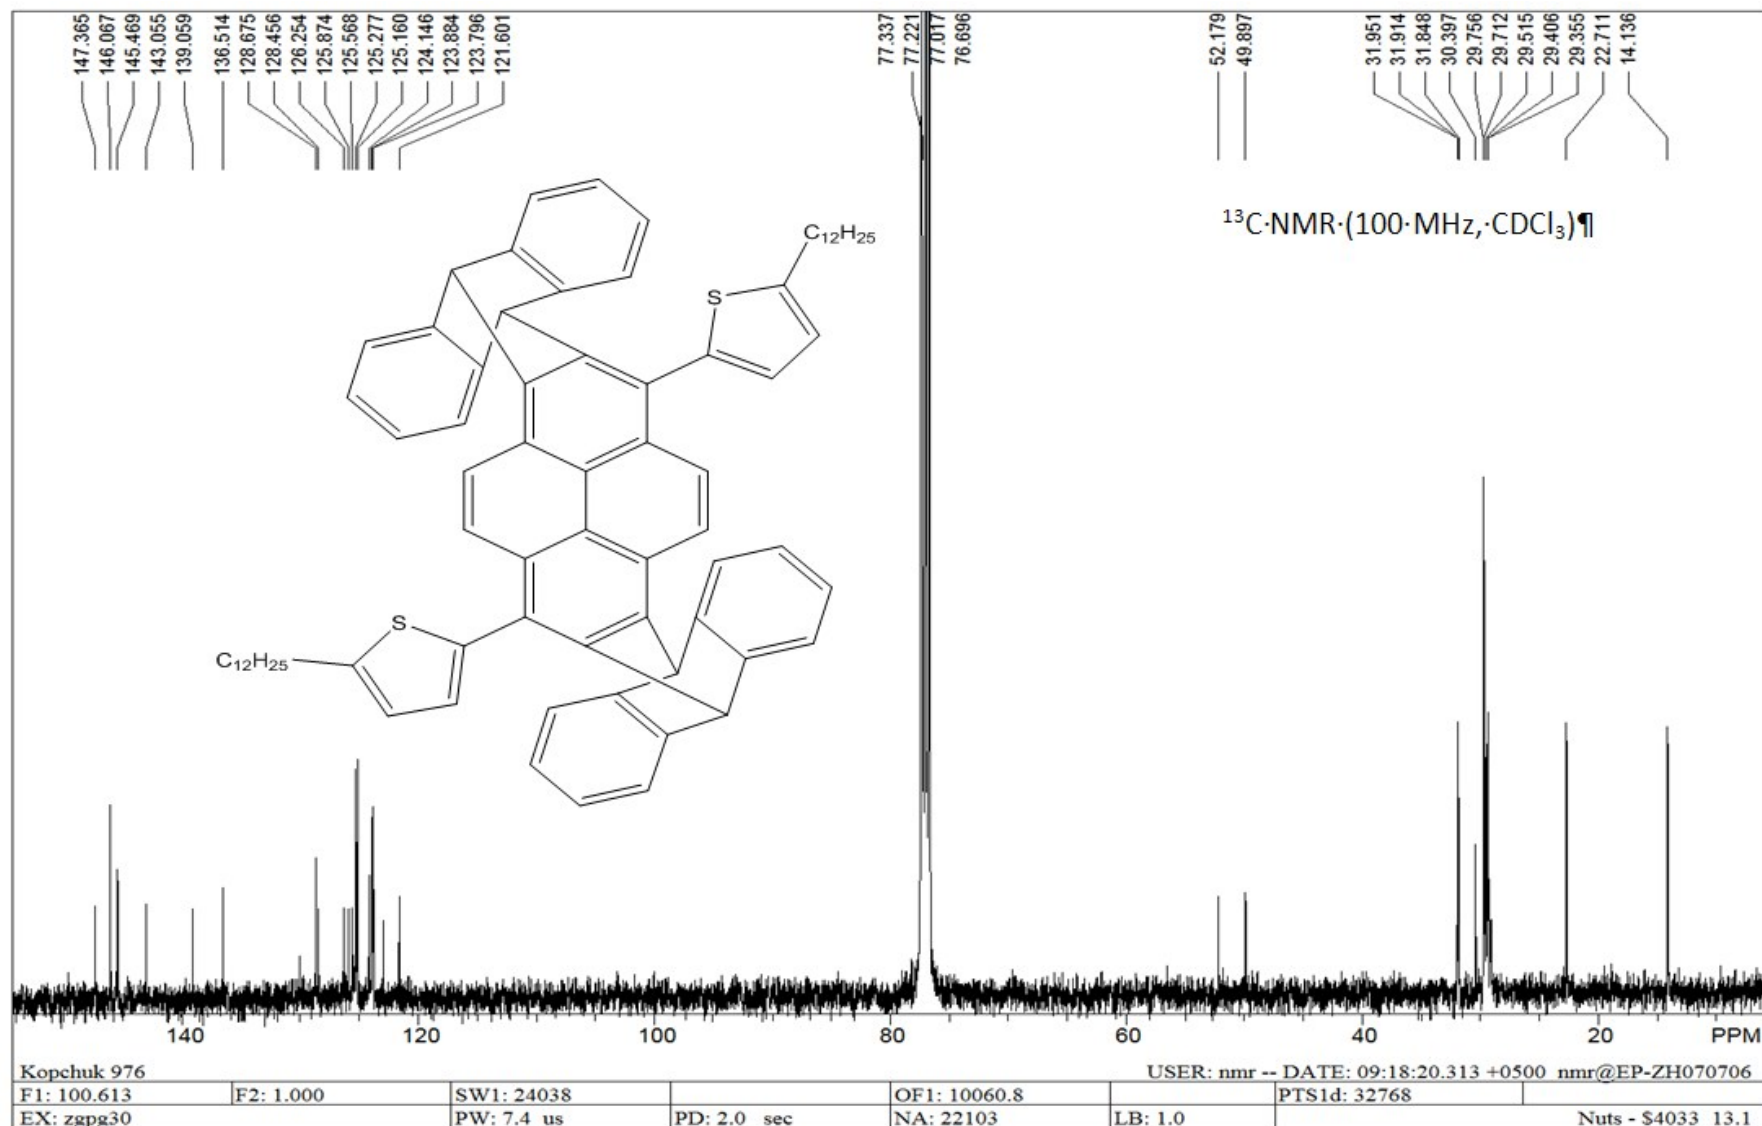

Fig. S87 <sup>13</sup>C NMR (100 MHz) iptycene 4c

X-ray data for the complex “iptycene 3·nitrobenzene”

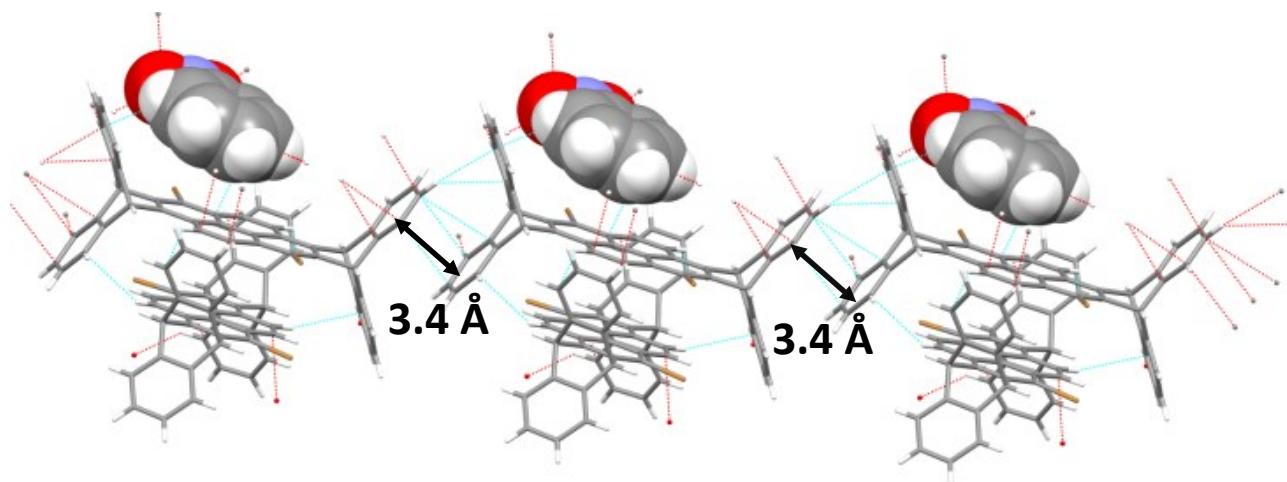

**Fig. S88.** The crystal packing of compound **3** crystallized from toluene-nitrobenzene solution. The interlunar distances between phenylene moieties are indicated.

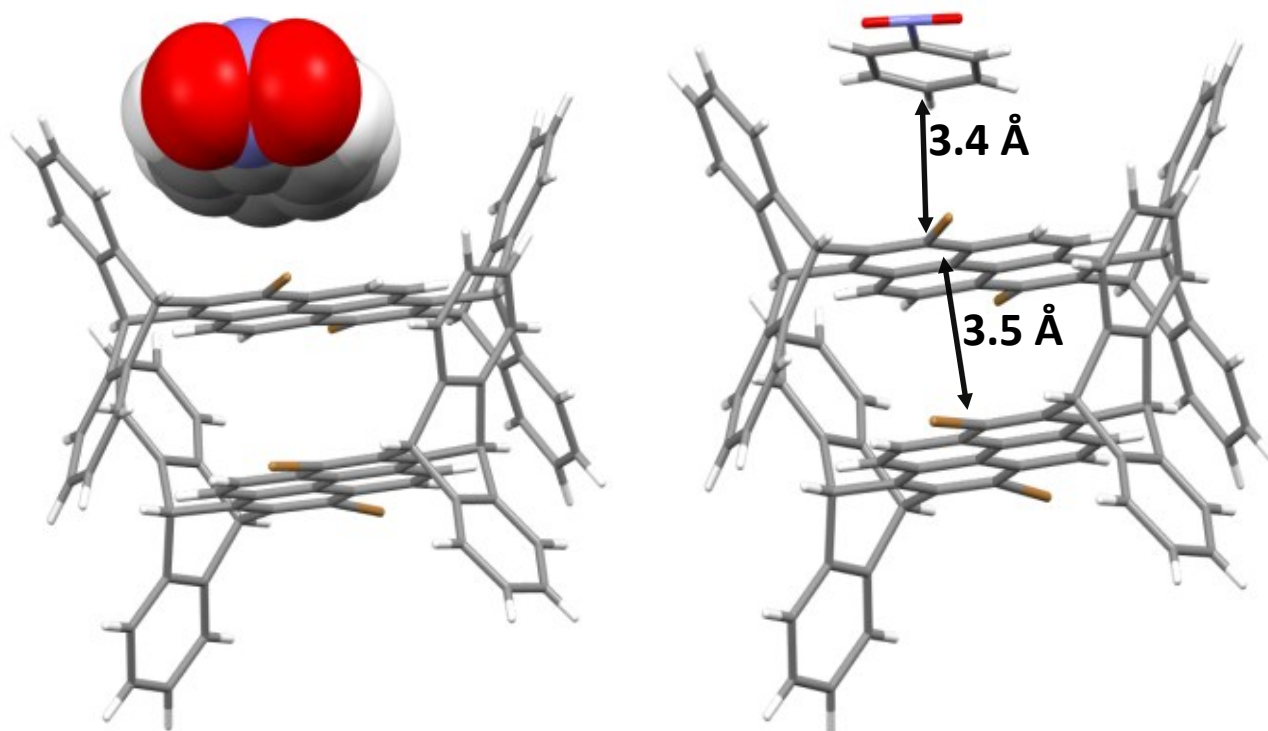

**Fig. S89.** Molecular structure of “iptycene **3** nitrobenzene” complex. The interplanar distances between the pyrene moiety and nitrobenzene molecule are indicated.

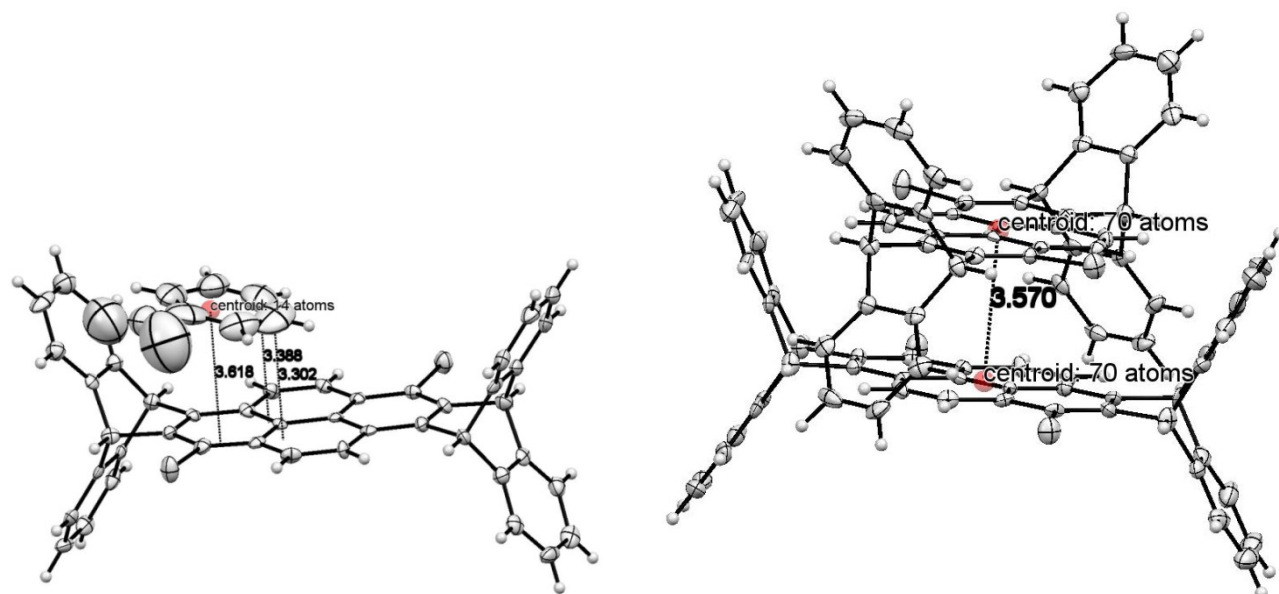

**Fig. S90.** Molecular structure of “iptycene **3** nitrobenzene” complex. The interplanar distances between the pyrene moiety and nitrobenzene molecule are indicated.

The XRD analysis of complex «**3**\*PhNO<sub>2</sub>» was performed on a Xcalibur 3 diffractometer on standard procedure (MoK-irradiation, graphite monochromator,  $\omega$ -scans, step 1°). The crystal was kept at 150(2) K during data collection. Using SHELXTL2 [1], the structure was solved with the ShelXS [1] structure solution program using Direct Methods and refined with the ShelXL [1] refinement package using Least Squares minimization in anisotropic approximation for non-hydrogen atoms. H-atoms were added in the calculated positions and were included in the refinement in the “rider” model.

**Crystal Data.** Crystal size 0.167x0.086x0.023 mm<sup>-1</sup>, system is triclinic, space group P-1,  $a$ = 13.0874(6) Å,  $b$ = 15.5471(12) Å,  $c$ = 22.686(2) Å,  $\alpha$ = 70.666(7)°,  $\beta$ = 88.978(8)°,  $\gamma$ = 67.069(6)°,  $V$ = 3978.5(5) Å<sup>3</sup>,  $Z$ = 1,  $\mu$ (MoK $\alpha$ )= 2.085 mm<sup>-1</sup>. On the angles 2.61 <  $\Theta$  < 26.37° 33893 reflections measured, 15642 unique ( $R_{\text{int}}$  = 0.0535) and 7584 with  $I > 2\sigma(I)$  which were used in all calculations. The final  $R_1$ = 0.1166,  $wR_2$ = 0.1024 (all data) and  $R_1$ = 0.0479,  $wR_2$ = 0.0963 ( $I > 2\sigma(I)$ ). Goodness-of-fit on  $F^2$  1.019, largest diff. peak/hole /  $\bar{e}\text{\AA}^{-3}$  0.984/-0.589.

## Electronic Supplementary Information

**Table S3. Crystal data and structure refinement for 3•C<sub>6</sub>H<sub>5</sub>NO<sub>2</sub>**

|                                                                                   |                           |
|-----------------------------------------------------------------------------------|---------------------------|
| <b>C<sub>221</sub> H<sub>140</sub> Br<sub>8</sub> N<sub>4</sub> O<sub>8</sub></b> | 3618.65                   |
| Chemical_formula_weight                                                           |                           |
| Symmetry_cell_setting                                                             | Triclinic                 |
| Symmetry_space_group_name_H-M                                                     | P-1                       |
| Symmetry_equiv_pos_as_xyz                                                         | 'x, y, z'<br>'-x, -y, -z' |
| Cell_length_a                                                                     | 13.0874(6)                |
| Cell_length_b                                                                     | 15.5471(12)               |
| Cell_length_c                                                                     | 22.686(2)                 |
| Cell_angle_alpha                                                                  | 70.666(7)                 |
| Cell_angle_beta                                                                   | 88.978(8)                 |
| Cell_angle_gamma                                                                  | 67.069(6)                 |
| Cell_volume                                                                       | 3978.5(5)                 |
| Cell_formula_units_Z                                                              | 1                         |
| Cell_measurement_temperature                                                      | 150(2)                    |
| Cell_measurement_reflns_used                                                      | 7965                      |
| Cell_measurement_theta_min                                                        | 2.6021                    |
| Cell_measurement_theta_max                                                        | 33.4955                   |
| Exptl_crystal_description                                                         | prism                     |
| Exptl_crystal_colour                                                              | colorless                 |
| Exptl_crystal_size_max                                                            | 0.1672                    |

## Electronic Supplementary Information

|                                |        |
|--------------------------------|--------|
| Exptl_crystal_size_mid         | 0.0858 |
| Exptl_crystal_size_min         | 0.0226 |
| Exptl_crystal_density_diffn    | 1.510  |
| Exptl_crystal_F_000            | 1838   |
| Exptl_absorpt_coefficient_mu   | 2.085  |
| Exptl_absorpt_correction_T_min | 0.579  |
| Exptl_absorpt_correction_T_max | 0.851  |

CrysAlis RED, Oxford Diffraction Ltd., Version 1.171.29.9 (release 23-03-2006 CrysAlis171 .NET)  
(compiled Mar 23 2006,23:39:28)

Analytical numeric absorption correction using a multifaceted crystal model based on expressions derived by R.C. Clark & J.S. Reid.<sup>1</sup>

X-ray data for the complex “iptycene 3·mesitylene”

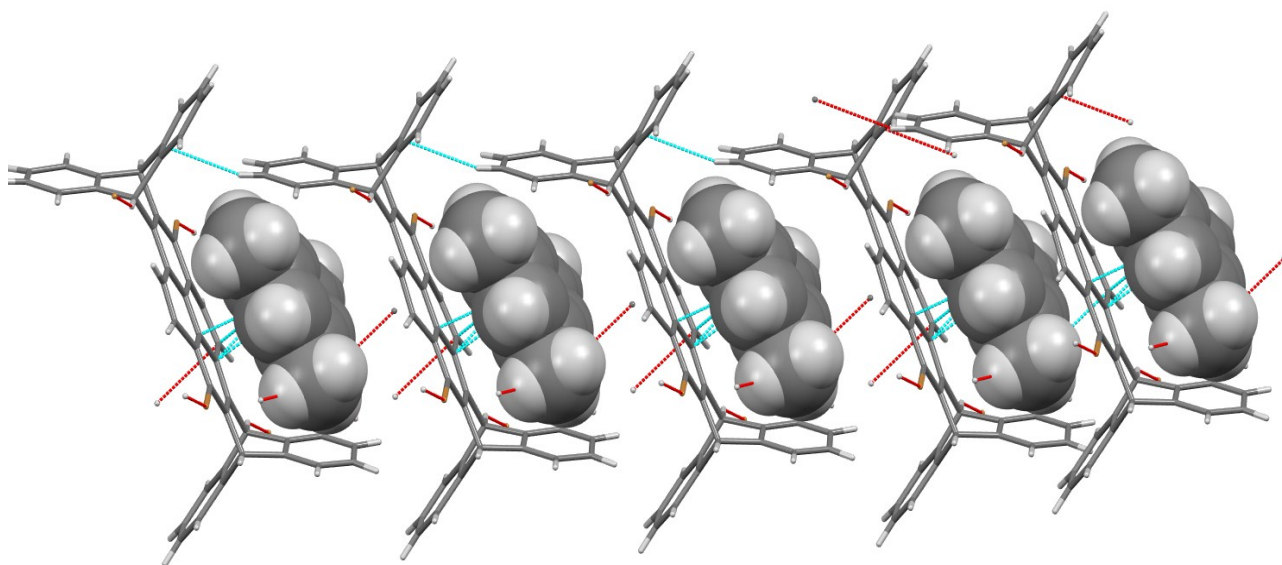

**Fig. S91.** The crystal packing of compound **3** crystallized from mesitylene solution.

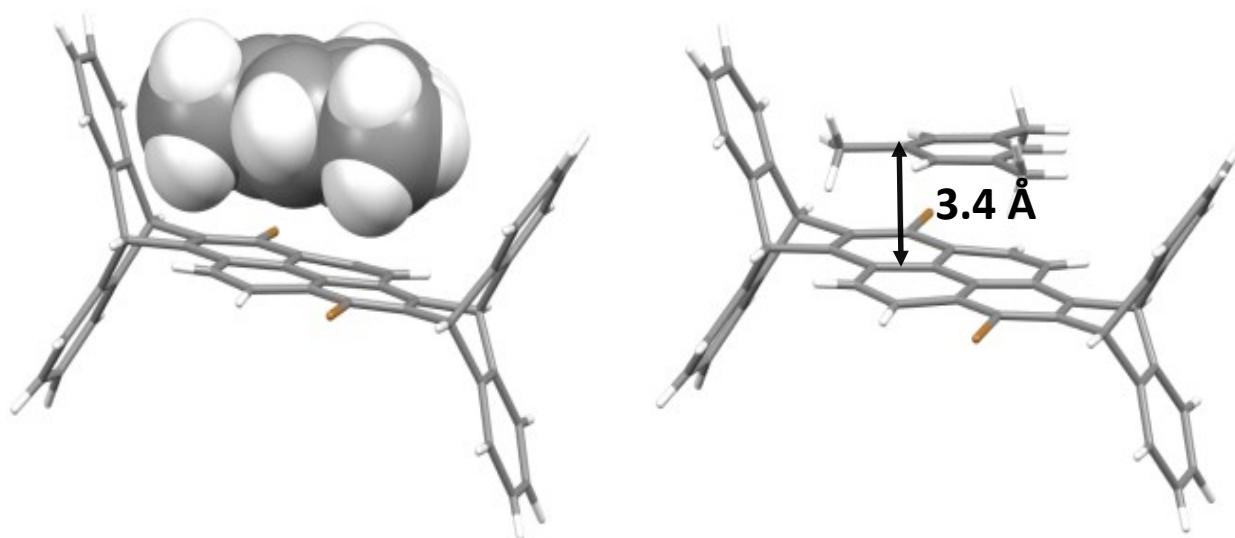

**Fig. S92.** Molecular structure of “iptycene **3** mesitylene” complex. The interplanar distance between the pyrene moiety and mesitylene molecule is indicated.

**Experimental.**

Single crystals of  $C_{53}H_{36}Br_2$  were crystallized from 2,4,6-trimethylbenzene. The XRD experiment was accomplished on an “Xcalibur 3” diffractometer on standard procedure (MoK irradiation, graphite monochromator,  $\omega$ -scans with  $1^\circ$  step). The crystal was kept at 295(2) K during data collection. Empirical absorption correction was applied. Using Olex2,<sup>2</sup> the structure was solved with the olex2.solve<sup>3</sup> structure solution program using Charge Flipping and refined with the ShelXL<sup>4</sup> refinement package using Least Squares minimization in anisotropic approximation for non-hydrogen atoms. The H-atoms were added in

## Electronic Supplementary Information

the calculated positions and were included in the refinement in the “rider” model. Results of the XRD analysis are presented below.

**Crystal Data.**  $C_{53}H_{36}Br_2$ ,  $M=832.64$ , triclinic,  $a = 8.3886(7) \text{ \AA}$ ,  $b = 9.0069(8) \text{ \AA}$ ,  $c = 14.5283(13) \text{ \AA}$ ,  $\alpha = 76.634(8)^\circ$ ,  $\beta = 89.729(7)^\circ$ ,  $\gamma = 64.661(8)^\circ$ ,  $V = 959.66(14) \text{ \AA}^3$ ,  $T = 295(2)$ , space group P1 (no. 1),  $Z = 1$ ,  $\mu(\text{Mo K}\alpha) = 2.150 \text{ mm}^{-1}$ , 7107 reflections measured, 5001 unique ( $R_{\text{int}} = 0.0306$ ) which were used in all calculations. The final  $wR_2$  was 0.1536 (all data) and  $R_1$  was 0.0509 ( $I > 2\sigma(I)$ ).

**Table S4. Crystal data and structure refinement.**

|                                                |                                                                   |
|------------------------------------------------|-------------------------------------------------------------------|
| Empirical formula                              | $C_{53}H_{36}Br_2$                                                |
| Formula weight                                 | 832.64                                                            |
| Temperature/K                                  | 295(2)                                                            |
| Crystal system                                 | triclinic                                                         |
| Space group                                    | P1                                                                |
| $a/\text{\AA}$                                 | 8.3886(7)                                                         |
| $b/\text{\AA}$                                 | 9.0069(8)                                                         |
| $c/\text{\AA}$                                 | 14.5283(13)                                                       |
| $\alpha/^\circ$                                | 76.634(8)                                                         |
| $\beta/^\circ$                                 | 89.729(7)                                                         |
| $\gamma/^\circ$                                | 64.661(8)                                                         |
| Volume/ $\text{\AA}^3$                         | 959.66(14)                                                        |
| $Z$                                            | 1                                                                 |
| $\rho_{\text{calc}}/\text{mg}/\text{mm}^3$     | 1.441                                                             |
| $m/\text{mm}^{-1}$                             | 2.150                                                             |
| $F(000)$                                       | 424.0                                                             |
| Crystal size/ $\text{mm}^3$                    | $0.25 \times 0.2 \times 0.15$                                     |
| $2\Theta$ range for data collection            | 5.18 to $52.74^\circ$                                             |
| Index ranges                                   | $-9 \leq h \leq 10$ , $-11 \leq k \leq 11$ , $-18 \leq l \leq 13$ |
| Reflections collected                          | 7107                                                              |
| Independent reflections                        | 5001 [ $R(\text{int}) = 0.0306$ ]                                 |
| Data/restraints/parameters                     | 5001/330/497                                                      |
| Goodness-of-fit on $F^2$                       | 1.006                                                             |
| Final R indexes [ $I > 2\sigma(I)$ ]           | $R_1 = 0.0509$ , $wR_2 = 0.1305$                                  |
| Final R indexes [all data]                     | $R_1 = 0.0751$ , $wR_2 = 0.1536$                                  |
| Largest diff. peak/hole / $e \text{ \AA}^{-3}$ | 0.55/-0.46                                                        |



## Electronic Supplementary Information

**Table S5. Fractional Atomic Coordinates ( $\times 10^4$ ) and Equivalent Isotropic Displacement Parameters ( $\text{\AA}^2 \times 10^3$ ).  $U_{\text{eq}}$  is defined as 1/3 of the trace of the orthogonalised  $U_{\text{IJ}}$  tensor.**

| Atom | <i>x</i>   | <i>y</i>   | <i>z</i>   | $U(\text{eq})$ |
|------|------------|------------|------------|----------------|
| Br1  | 5456.3 (8) | 7454.0 (8) | 9322.8 (6) | 55.9 (4)       |
| Br2  | 7444.1 (8) | 1496.9 (7) | 4494.5 (6) | 54.0 (4)       |
| C1   | 6528 (15)  | 6655 (17)  | 2972 (9)   | 32 (3)         |
| C2   | 6382 (15)  | 7915 (15)  | 3425 (10)  | 35 (3)         |
| C3   | 5095 (16)  | 9568 (17)  | 3011 (10)  | 38 (3)         |
| C4   | 3954 (18)  | 9834 (19)  | 2225 (11)  | 48 (4)         |
| C5   | 4038 (18)  | 8590 (20)  | 1776 (12)  | 56 (4)         |
| C6   | 5324 (18)  | 6961 (19)  | 2160 (12)  | 50 (4)         |
| C7   | 7943 (17)  | 4846 (18)  | 3551 (11)  | 47 (4)         |
| C8   | 9628 (17)  | 5175 (19)  | 3525 (11)  | 47 (4)         |
| C9   | 11242 (19) | 4210 (20)  | 3187 (12)  | 59 (4)         |
| C10  | 12601 (18) | 4680 (20)  | 3273 (13)  | 64 (4)         |
| C11  | 12400 (20) | 5930 (30)  | 3742 (15)  | 84 (6)         |
| C12  | 10813 (17) | 6905 (18)  | 4074 (10)  | 51 (3)         |
| C13  | 9470 (17)  | 6502 (17)  | 3958 (10)  | 43 (3)         |
| C14  | 7588 (17)  | 7304 (18)  | 4241 (11)  | 43 (4)         |
| C15  | 7314 (15)  | 5876 (14)  | 4955 (10)  | 28 (3)         |
| C16  | 7472 (14)  | 4677 (15)  | 4546 (9)   | 31 (3)         |
| C17  | 7254 (16)  | 3271 (16)  | 5092 (11)  | 36 (3)         |
| C18  | 6862 (16)  | 3145 (16)  | 6001 (11)  | 37 (3)         |
| C19  | 6378 (16)  | 1885 (15)  | 6577 (10)  | 38 (3)         |
| C20  | 6098 (17)  | 1724 (15)  | 7497 (9)   | 34 (3)         |
| C21  | 5997 (16)  | 3051 (17)  | 7919 (10)  | 37 (3)         |
| C22  | 6276 (15)  | 4444 (15)  | 7364 (11)  | 35 (3)         |
| C23  | 6688 (15)  | 4509 (15)  | 6411 (10)  | 31 (3)         |
| C24  | 6956 (16)  | 5882 (15)  | 5877 (11)  | 35 (3)         |
| C25  | 6790 (20)  | 7170 (20)  | 6367 (13)  | 57 (4)         |
| C26  | 6276 (18)  | 7227 (18)  | 7245 (10)  | 43 (3)         |
| C27  | 6160 (16)  | 5787 (16)  | 7788 (10)  | 33 (3)         |
| C28  | 5723 (17)  | 5683 (17)  | 8758 (11)  | 38 (3)         |
| C29  | 5397 (16)  | 4418 (16)  | 9281 (10)  | 34 (3)         |
| C30  | 5600 (15)  | 2920 (17)  | 8890 (11)  | 38 (3)         |
| C31  | 5244 (15)  | 1619 (14)  | 9545 (10)  | 30 (3)         |
| C32  | 6637 (15)  | 1078 (16)  | 10469 (9)  | 34 (3)         |
| C33  | 7931 (18)  | -530 (20)  | 10846 (12) | 49 (4)         |
| C34  | 8990 (20)  | -910 (20)  | 11659 (13) | 59 (5)         |
| C35  | 8742 (19)  | 450 (20)   | 12009 (12) | 55 (4)         |
| C36  | 7418 (17)  | 2106 (18)  | 11625 (11) | 47 (3)         |
| C37  | 6438 (17)  | 2429 (17)  | 10836 (11) | 37 (3)         |
| C38  | 4965 (15)  | 4039 (15)  | 10330 (9)  | 35 (3)         |
| C39  | 3262 (17)  | 3887 (17)  | 10247 (10) | 40 (3)         |
| C40  | 1690 (20)  | 4790 (20)  | 10570 (13) | 64 (5)         |

## Electronic Supplementary Information

|     |            |            |            |          |
|-----|------------|------------|------------|----------|
| C41 | 230 (20)   | 4460 (20)  | 10441 (15) | 76 (5)   |
| C42 | 382 (17)   | 3140 (20)  | 10112 (12) | 67 (4)   |
| C43 | 1955 (17)  | 2268 (19)  | 9773 (12)  | 60 (4)   |
| C44 | 3436 (15)  | 2610 (17)  | 9866 (10)  | 42 (3)   |
| C1S | 11620 (20) | -940 (30)  | 6483 (15)  | 123 (7)  |
| C2S | 11988 (18) | 272 (18)   | 5863 (11)  | 89 (4)   |
| C3S | 11849 (18) | 1776 (19)  | 6071 (12)  | 105 (5)  |
| C4S | 11259 (15) | 2205 (17)  | 6927 (11)  | 97 (4)   |
| C5S | 10835 (16) | 1023 (19)  | 7553 (11)  | 106 (4)  |
| C6S | 11090 (20) | -530 (20)  | 7346 (15)  | 95 (5)   |
| C7S | 10650 (30) | -1860 (30) | 8010 (17)  | 191 (11) |
| C8S | 12519 (14) | -139 (17)  | 4974 (9)   | 86 (4)   |
| C9S | 11038 (17) | 3854 (18)  | 7110 (13)  | 123 (6)  |

**Table S6. Anisotropic Displacement Parameters ( $\text{\AA}^2 \times 10^3$ ). The Anisotropic displacement factor exponent takes the form:  $-2\pi^2[h^2a^*^2U_{11}+\dots+2hka \times b \times U_{12}]$ .**

| Atom | $U_{11}$  | $U_{22}$ | $U_{33}$  | $U_{23}$  | $U_{13}$ | $U_{12}$  |
|------|-----------|----------|-----------|-----------|----------|-----------|
| Br1  | 91.1 (10) | 42.4 (8) | 43.4 (10) | -21.0 (8) | 14.1 (8) | -32.7 (7) |
| Br2  | 92.1 (10) | 38.1 (8) | 43.3 (10) | -18.6 (7) | 12.8 (7) | -34.9 (7) |
| C1   | 38 (5)    | 36 (5)   | 20 (5)    | -5 (4)    | 3 (4)    | -15 (4)   |
| C2   | 46 (5)    | 28 (5)   | 36 (6)    | -9 (4)    | 19 (4)   | -20 (4)   |
| C3   | 51 (5)    | 31 (5)   | 31 (5)    | -7 (4)    | 13 (4)   | -18 (4)   |
| C4   | 47 (6)    | 35 (6)   | 38 (6)    | 7 (5)     | -1 (5)   | -5 (4)    |
| C5   | 43 (5)    | 57 (7)   | 44 (7)    | 5 (6)     | -8 (5)   | -8 (5)    |
| C6   | 58 (6)    | 53 (7)   | 49 (7)    | -16 (6)   | 0 (5)    | -33 (5)   |
| C7   | 58 (6)    | 43 (6)   | 41 (7)    | -7 (5)    | -11 (5)  | -25 (5)   |
| C8   | 43 (6)    | 45 (6)   | 42 (7)    | -3 (5)    | 6 (5)    | -13 (5)   |
| C9   | 54 (6)    | 54 (7)   | 48 (7)    | -6 (6)    | 10 (5)   | -9 (5)    |
| C10  | 45 (6)    | 65 (7)   | 58 (7)    | 0 (6)     | 14 (5)   | -10 (5)   |
| C11  | 50 (7)    | 98 (9)   | 93 (10)   | 10 (7)    | -6 (6)   | -41 (6)   |
| C12  | 59 (6)    | 56 (6)   | 36 (6)    | 0 (5)     | 10 (5)   | -30 (5)   |
| C13  | 49 (6)    | 41 (6)   | 33 (6)    | -10 (5)   | 3 (4)    | -15 (4)   |
| C14  | 54 (6)    | 44 (7)   | 38 (7)    | -23 (5)   | 12 (5)   | -24 (5)   |
| C15  | 47 (5)    | 16 (4)   | 25 (5)    | 3 (4)     | 7 (4)    | -21 (4)   |
| C16  | 34 (5)    | 26 (5)   | 27 (6)    | -3 (4)    | 6 (4)    | -11 (4)   |
| C17  | 53 (6)    | 24 (5)   | 31 (6)    | -15 (5)   | 8 (5)    | -13 (4)   |
| C18  | 46 (5)    | 21 (5)   | 46 (7)    | -4 (5)    | 7 (5)    | -18 (4)   |
| C19  | 64 (5)    | 24 (5)   | 40 (6)    | -17 (4)   | 12 (4)   | -26 (4)   |
| C20  | 67 (6)    | 20 (5)   | 18 (5)    | 3 (4)     | 9 (4)    | -26 (4)   |
| C21  | 42 (5)    | 37 (6)   | 27 (6)    | -10 (5)   | -2 (4)   | -12 (4)   |
| C22  | 46 (5)    | 24 (6)   | 35 (6)    | -12 (5)   | 1 (5)    | -15 (4)   |
| C23  | 49 (6)    | 21 (5)   | 25 (6)    | 2 (4)     | 7 (4)    | -20 (4)   |
| C24  | 53 (6)    | 20 (5)   | 42 (7)    | -10 (5)   | 11 (5)   | -25 (4)   |

## Electronic Supplementary Information

|     |          |          |          |          |          |          |
|-----|----------|----------|----------|----------|----------|----------|
| C25 | 79 (7)   | 46 (7)   | 63 (9)   | -25 (6)  | 9 (6)    | -39 (6)  |
| C26 | 70 (6)   | 36 (5)   | 28 (6)   | -14 (5)  | 8 (4)    | -25 (4)  |
| C27 | 47 (5)   | 28 (5)   | 26 (6)   | -10 (5)  | 3 (4)    | -19 (4)  |
| C28 | 50 (6)   | 37 (6)   | 35 (7)   | -13 (5)  | -2 (5)   | -24 (5)  |
| C29 | 54 (6)   | 24 (5)   | 29 (6)   | -8 (4)   | 1 (4)    | -20 (4)  |
| C30 | 36 (5)   | 40 (6)   | 36 (7)   | -11 (5)  | 2 (4)    | -14 (4)  |
| C31 | 43 (5)   | 22 (5)   | 28 (6)   | 3 (4)    | 2 (4)    | -22 (4)  |
| C32 | 37 (5)   | 38 (5)   | 25 (5)   | -1 (4)   | -2 (4)   | -20 (4)  |
| C33 | 53 (6)   | 42 (6)   | 52 (7)   | -5 (5)   | 4 (5)    | -23 (5)  |
| C34 | 54 (6)   | 57 (8)   | 50 (8)   | 2 (6)    | 2 (5)    | -17 (6)  |
| C35 | 59 (6)   | 65 (8)   | 42 (7)   | -3 (6)   | -11 (5)  | -35 (6)  |
| C36 | 55 (6)   | 47 (6)   | 32 (6)   | -7 (5)   | 8 (5)    | -19 (5)  |
| C37 | 49 (5)   | 34 (5)   | 35 (6)   | -10 (4)  | 14 (4)   | -25 (4)  |
| C38 | 52 (5)   | 21 (5)   | 27 (5)   | -7 (4)   | 21 (4)   | -12 (4)  |
| C39 | 49 (6)   | 32 (5)   | 28 (6)   | 3 (4)    | 9 (4)    | -13 (4)  |
| C40 | 68 (7)   | 52 (7)   | 53 (8)   | -1 (6)   | 23 (6)   | -15 (5)  |
| C41 | 48 (6)   | 78 (8)   | 76 (8)   | 5 (6)    | 20 (6)   | -16 (6)  |
| C42 | 40 (6)   | 85 (8)   | 56 (7)   | 9 (6)    | 0 (5)    | -22 (5)  |
| C43 | 51 (6)   | 68 (7)   | 62 (8)   | -2 (6)   | -13 (5)  | -35 (5)  |
| C44 | 40 (5)   | 45 (6)   | 40 (6)   | 10 (5)   | 3 (4)    | -27 (4)  |
| C1S | 111 (10) | 125 (11) | 117 (11) | -8 (8)   | -21 (7)  | -47 (8)  |
| C2S | 79 (7)   | 74 (7)   | 94 (8)   | -18 (7)  | -16 (6)  | -18 (5)  |
| C3S | 83 (7)   | 109 (8)  | 111 (9)  | -16 (7)  | -10 (6)  | -37 (6)  |
| C4S | 70 (6)   | 112 (8)  | 95 (8)   | -17 (7)  | -17 (5)  | -30 (6)  |
| C5S | 77 (6)   | 138 (9)  | 86 (8)   | -23 (7)  | -12 (5)  | -34 (6)  |
| C6S | 82 (7)   | 81 (8)   | 103 (9)  | -17 (7)  | -26 (6)  | -21 (6)  |
| C7S | 113 (13) | 230 (20) | 168 (18) | 56 (15)  | -58 (12) | -74 (14) |
| C8S | 64 (6)   | 97 (8)   | 86 (9)   | -24 (7)  | 7 (5)    | -24 (5)  |
| C9S | 87 (8)   | 121 (12) | 141 (13) | -49 (10) | -24 (8)  | -19 (7)  |

**Table S7. Bond Lengths.**

| Atom | Atom | Length/Å   | Atom | Atom | Length/Å   |
|------|------|------------|------|------|------------|
| Br1  | C28  | 1.888 (13) | C24  | C25  | 1.450 (17) |
| Br2  | C17  | 1.937 (12) | C25  | C26  | 1.35 (2)   |
| C1   | C2   | 1.400 (17) | C26  | C27  | 1.396 (18) |
| C1   | C6   | 1.452 (17) | C27  | C28  | 1.45 (2)   |
| C1   | C7   | 1.578 (18) | C28  | C29  | 1.347 (19) |
| C2   | C3   | 1.400 (17) | C29  | C30  | 1.526 (17) |
| C2   | C14  | 1.403 (18) | C29  | C38  | 1.559 (18) |
| C3   | C4   | 1.402 (18) | C30  | C31  | 1.466 (17) |
| C4   | C5   | 1.40 (2)   | C31  | C32  | 1.622 (16) |
| C5   | C6   | 1.38 (2)   | C31  | C44  | 1.530 (17) |
| C7   | C8   | 1.562 (19) | C32  | C33  | 1.366 (18) |

## Electronic Supplementary Information

|     |     |           |     |     |           |
|-----|-----|-----------|-----|-----|-----------|
| C7  | C16 | 1.49(2)   | C32 | C37 | 1.385(17) |
| C8  | C9  | 1.420(19) | C33 | C34 | 1.36(2)   |
| C8  | C13 | 1.433(19) | C34 | C35 | 1.36(2)   |
| C9  | C10 | 1.40(2)   | C35 | C36 | 1.41(2)   |
| C10 | C11 | 1.40(2)   | C36 | C37 | 1.313(18) |
| C11 | C12 | 1.40(2)   | C37 | C38 | 1.467(18) |
| C12 | C13 | 1.345(19) | C38 | C39 | 1.500(18) |
| C13 | C14 | 1.529(18) | C39 | C40 | 1.369(19) |
| C14 | C15 | 1.555(18) | C39 | C44 | 1.342(18) |
| C15 | C16 | 1.308(17) | C40 | C41 | 1.40(2)   |
| C15 | C24 | 1.372(19) | C41 | C42 | 1.34(2)   |
| C16 | C17 | 1.414(19) | C42 | C43 | 1.374(19) |
| C17 | C18 | 1.35(2)   | C43 | C44 | 1.416(17) |
| C18 | C19 | 1.451(17) | C1S | C2S | 1.391(17) |
| C18 | C23 | 1.438(17) | C1S | C6S | 1.404(15) |
| C19 | C20 | 1.341(18) | C2S | C3S | 1.412(15) |
| C20 | C21 | 1.437(17) | C2S | C8S | 1.442(15) |
| C21 | C22 | 1.435(19) | C3S | C4S | 1.411(15) |
| C21 | C30 | 1.437(19) | C4S | C5S | 1.401(15) |
| C22 | C23 | 1.419(8)  | C4S | C9S | 1.502(14) |
| C22 | C27 | 1.448(16) | C5S | C6S | 1.425(16) |
| C23 | C24 | 1.406(17) | C6S | C7S | 1.524(18) |

**Table S8. Bond Angles.**

| Atom | Atom | Atom | Angle/°   | Atom | Atom | Atom | Angle/°   |
|------|------|------|-----------|------|------|------|-----------|
| C2   | C1   | C6   | 123.2(12) | C26  | C25  | C24  | 126.6(16) |
| C2   | C1   | C7   | 111.3(11) | C25  | C26  | C27  | 116.4(13) |
| C6   | C1   | C7   | 124.8(12) | C26  | C27  | C22  | 120.8(13) |
| C1   | C2   | C3   | 117.0(12) | C26  | C27  | C28  | 120.8(12) |
| C1   | C2   | C14  | 113.5(12) | C28  | C27  | C22  | 118.0(13) |
| C3   | C2   | C14  | 129.5(12) | C27  | C28  | Br1  | 119.5(11) |
| C2   | C3   | C4   | 118.5(12) | C29  | C28  | Br1  | 116.8(11) |
| C5   | C4   | C3   | 125.4(13) | C29  | C28  | C27  | 123.5(12) |
| C6   | C5   | C4   | 116.8(13) | C28  | C29  | C30  | 120.6(13) |
| C5   | C6   | C1   | 118.7(14) | C28  | C29  | C38  | 131.7(12) |
| C8   | C7   | C1   | 99.4(11)  | C30  | C29  | C38  | 107.4(11) |
| C16  | C7   | C1   | 105.5(11) | C21  | C30  | C29  | 115.3(13) |
| C16  | C7   | C8   | 107.3(11) | C21  | C30  | C31  | 129.9(13) |
| C9   | C8   | C7   | 125.5(15) | C31  | C30  | C29  | 114.7(12) |
| C9   | C8   | C13  | 121.0(14) | C30  | C31  | C32  | 102.4(10) |
| C13  | C8   | C7   | 113.3(12) | C30  | C31  | C44  | 104.5(10) |
| C10  | C9   | C8   | 115.5(16) | C44  | C31  | C32  | 104.0(11) |
| C9   | C10  | C11  | 121.0(14) | C33  | C32  | C31  | 124.6(11) |

## Electronic Supplementary Information

|     |     |     |            |     |     |     |            |
|-----|-----|-----|------------|-----|-----|-----|------------|
| C10 | C11 | C12 | 123.7 (15) | C33 | C32 | C37 | 122.0 (12) |
| C13 | C12 | C11 | 115.5 (15) | C37 | C32 | C31 | 113.4 (11) |
| C8  | C13 | C14 | 108.6 (12) | C34 | C33 | C32 | 121.1 (14) |
| C12 | C13 | C8  | 123.0 (13) | C35 | C34 | C33 | 115.2 (16) |
| C12 | C13 | C14 | 128.5 (14) | C34 | C35 | C36 | 124.0 (14) |
| C2  | C14 | C13 | 108.6 (12) | C37 | C36 | C35 | 119.0 (15) |
| C2  | C14 | C15 | 109.3 (11) | C32 | C37 | C38 | 113.2 (12) |
| C13 | C14 | C15 | 107.2 (11) | C36 | C37 | C32 | 118.1 (14) |
| C16 | C15 | C14 | 110.0 (12) | C36 | C37 | C38 | 128.2 (13) |
| C16 | C15 | C24 | 125.3 (12) | C37 | C38 | C29 | 106.5 (10) |
| C24 | C15 | C14 | 124.7 (11) | C37 | C38 | C39 | 112.2 (11) |
| C15 | C16 | C7  | 118.0 (12) | C39 | C38 | C29 | 103.9 (11) |
| C15 | C16 | C17 | 117.7 (12) | C40 | C39 | C38 | 127.8 (14) |
| C17 | C16 | C7  | 124.2 (11) | C44 | C39 | C38 | 112.3 (11) |
| C16 | C17 | Br2 | 118.5 (10) | C44 | C39 | C40 | 119.7 (14) |
| C18 | C17 | Br2 | 118.9 (11) | C39 | C40 | C41 | 120.3 (18) |
| C18 | C17 | C16 | 122.6 (12) | C42 | C41 | C40 | 121.2 (16) |
| C17 | C18 | C19 | 126.8 (12) | C41 | C42 | C43 | 117.5 (15) |
| C17 | C18 | C23 | 117.2 (13) | C42 | C43 | C44 | 121.7 (15) |
| C23 | C18 | C19 | 115.5 (13) | C39 | C44 | C31 | 117.1 (11) |
| C20 | C19 | C18 | 125.7 (12) | C39 | C44 | C43 | 118.9 (13) |
| C19 | C20 | C21 | 117.8 (12) | C43 | C44 | C31 | 123.9 (13) |
| C22 | C21 | C20 | 119.5 (12) | C2S | C1S | C6S | 114 (2)    |
| C22 | C21 | C30 | 122.9 (13) | C1S | C2S | C3S | 123.7 (18) |
| C30 | C21 | C20 | 117.6 (13) | C1S | C2S | C8S | 113.7 (14) |
| C21 | C22 | C27 | 119.4 (14) | C3S | C2S | C8S | 122.6 (16) |
| C23 | C22 | C21 | 121.0 (8)  | C4S | C3S | C2S | 122.3 (15) |
| C23 | C22 | C27 | 119.6 (10) | C3S | C4S | C9S | 121.3 (15) |
| C22 | C23 | C18 | 119.6 (9)  | C5S | C4S | C3S | 114.9 (13) |
| C24 | C23 | C18 | 120.2 (14) | C5S | C4S | C9S | 123.7 (15) |
| C24 | C23 | C22 | 120.3 (9)  | C4S | C5S | C6S | 121.3 (16) |
| C15 | C24 | C23 | 116.9 (12) | C1S | C6S | C5S | 124 (2)    |
| C15 | C24 | C25 | 127.5 (13) | C1S | C6S | C7S | 112.8 (17) |
| C23 | C24 | C25 | 115.5 (14) | C5S | C6S | C7S | 123 (2)    |

**Table S9. Torsion Angles.**

| A   | B   | C   | D   | Angle/°    |
|-----|-----|-----|-----|------------|
| Br1 | C28 | C29 | C30 | -179.2 (8) |
| Br1 | C28 | C29 | C38 | -6 (2)     |
| Br2 | C17 | C18 | C19 | -6.7 (18)  |
| Br2 | C17 | C18 | C23 | -178.4 (8) |
| C1  | C2  | C3  | C4  | 5.0 (18)   |
| C1  | C2  | C14 | C13 | 58.8 (15)  |

## Electronic Supplementary Information

|     |     |     |     |        |      |
|-----|-----|-----|-----|--------|------|
| C1  | C2  | C14 | C15 | -57.8  | (14) |
| C1  | C7  | C8  | C9  | -125.0 | (15) |
| C1  | C7  | C8  | C13 | 60.0   | (15) |
| C1  | C7  | C16 | C15 | -53.5  | (14) |
| C1  | C7  | C16 | C17 | 129.1  | (12) |
| C2  | C1  | C6  | C5  | 4      | (2)  |
| C2  | C1  | C7  | C8  | -60.9  | (14) |
| C2  | C1  | C7  | C16 | 50.1   | (14) |
| C2  | C3  | C4  | C5  | -3     | (2)  |
| C2  | C14 | C15 | C16 | 56.2   | (13) |
| C2  | C14 | C15 | C24 | -123.7 | (14) |
| C3  | C2  | C14 | C13 | -120.8 | (16) |
| C3  | C2  | C14 | C15 | 122.6  | (15) |
| C3  | C4  | C5  | C6  | 2      | (3)  |
| C4  | C5  | C6  | C1  | -2     | (3)  |
| C6  | C1  | C2  | C3  | -5.5   | (19) |
| C6  | C1  | C2  | C14 | 174.8  | (13) |
| C6  | C1  | C7  | C8  | 128.4  | (14) |
| C6  | C1  | C7  | C16 | -120.6 | (14) |
| C7  | C1  | C2  | C3  | -176.5 | (12) |
| C7  | C1  | C2  | C14 | 3.9    | (16) |
| C7  | C1  | C6  | C5  | 173.8  | (15) |
| C7  | C8  | C9  | C10 | -177.1 | (15) |
| C7  | C8  | C13 | C12 | 175.0  | (14) |
| C7  | C8  | C13 | C14 | -5.0   | (18) |
| C7  | C16 | C17 | Br2 | -3.6   | (17) |
| C7  | C16 | C17 | C18 | 178.6  | (12) |
| C8  | C7  | C16 | C15 | 51.8   | (15) |
| C8  | C7  | C16 | C17 | -125.5 | (13) |
| C8  | C9  | C10 | C11 | 5      | (3)  |
| C8  | C13 | C14 | C2  | -58.0  | (16) |
| C8  | C13 | C14 | C15 | 60.0   | (15) |
| C9  | C8  | C13 | C12 | 0      | (2)  |
| C9  | C8  | C13 | C14 | 179.8  | (14) |
| C9  | C10 | C11 | C12 | -6     | (3)  |
| C10 | C11 | C12 | C13 | 3      | (3)  |
| C11 | C12 | C13 | C8  | 0      | (2)  |
| C11 | C12 | C13 | C14 | 179.9  | (14) |
| C12 | C13 | C14 | C2  | 122.1  | (16) |
| C12 | C13 | C14 | C15 | -120.0 | (17) |
| C13 | C8  | C9  | C10 | -2     | (2)  |
| C13 | C14 | C15 | C16 | -61.3  | (14) |
| C13 | C14 | C15 | C24 | 118.8  | (13) |
| C14 | C2  | C3  | C4  | -175.4 | (15) |
| C14 | C15 | C16 | C7  | 2.7    | (15) |

## Electronic Supplementary Information

|                 |             |
|-----------------|-------------|
| C14 C15 C16 C17 | -179.7 (10) |
| C14 C15 C24 C23 | 177.9 (11)  |
| C14 C15 C24 C25 | -1 (2)      |
| C15 C16 C17 Br2 | 179.0 (9)   |
| C15 C16 C17 C18 | 1.2 (19)    |
| C15 C24 C25 C26 | 173.5 (15)  |
| C16 C7 C8 C9    | 125.4 (15)  |
| C16 C7 C8 C13   | -49.5 (16)  |
| C16 C15 C24 C23 | -2 (2)      |
| C16 C15 C24 C25 | 179.3 (13)  |
| C16 C17 C18 C19 | 171.0 (12)  |
| C16 C17 C18 C23 | -0.7 (19)   |
| C17 C18 C19 C20 | 175.8 (14)  |
| C17 C18 C23 C22 | 179.9 (9)   |
| C17 C18 C23 C24 | -1.2 (19)   |
| C18 C19 C20 C21 | 10 (2)      |
| C18 C23 C24 C15 | 2.4 (19)    |
| C18 C23 C24 C25 | -178.7 (11) |
| C19 C18 C23 C22 | 7.3 (13)    |
| C19 C18 C23 C24 | -173.8 (12) |
| C19 C20 C21 C22 | -2.8 (18)   |
| C19 C20 C21 C30 | 176.7 (12)  |
| C20 C21 C22 C23 | -1.5 (15)   |
| C20 C21 C22 C27 | 179.5 (10)  |
| C20 C21 C30 C29 | -176.4 (10) |
| C20 C21 C30 C31 | -0.9 (19)   |
| C21 C22 C23 C18 | -1.1 (10)   |
| C21 C22 C23 C24 | 180.0 (16)  |
| C21 C22 C27 C26 | -174.6 (12) |
| C21 C22 C27 C28 | -1.4 (18)   |
| C21 C30 C31 C32 | 127.4 (14)  |
| C21 C30 C31 C44 | -124.4 (14) |
| C22 C21 C30 C29 | 3.0 (18)    |
| C22 C21 C30 C31 | 178.5 (11)  |
| C22 C23 C24 C15 | -178.7 (9)  |
| C22 C23 C24 C25 | 0.2 (15)    |
| C22 C27 C28 Br1 | -177.3 (8)  |
| C22 C27 C28 C29 | -1 (2)      |
| C23 C18 C19 C20 | -12.4 (19)  |
| C23 C22 C27 C26 | 6.4 (14)    |
| C23 C22 C27 C28 | 179.6 (9)   |
| C23 C24 C25 C26 | -5 (2)      |
| C24 C15 C16 C7  | -177.3 (13) |
| C24 C15 C16 C17 | 0.2 (19)    |
| C24 C25 C26 C27 | 10 (2)      |

## Electronic Supplementary Information

|                 |             |
|-----------------|-------------|
| C25 C26 C27 C22 | -10.5 (19)  |
| C25 C26 C27 C28 | 176.5 (13)  |
| C26 C27 C28 Br1 | -4.1 (16)   |
| C26 C27 C28 C29 | 172.3 (13)  |
| C27 C22 C23 C18 | 177.9 (14)  |
| C27 C22 C23 C24 | -1.0 (10)   |
| C27 C28 C29 C30 | 4 (2)       |
| C27 C28 C29 C38 | 178.0 (12)  |
| C28 C29 C30 C21 | -5.2 (18)   |
| C28 C29 C30 C31 | 178.6 (11)  |
| C28 C29 C38 C37 | -116.1 (16) |
| C28 C29 C38 C39 | 125.4 (15)  |
| C29 C30 C31 C32 | -57.0 (11)  |
| C29 C30 C31 C44 | 51.2 (13)   |
| C29 C38 C39 C40 | -123.7 (15) |
| C29 C38 C39 C44 | 61.5 (15)   |
| C30 C21 C22 C23 | 179.1 (9)   |
| C30 C21 C22 C27 | 0.1 (19)    |
| C30 C29 C38 C37 | 58.2 (13)   |
| C30 C29 C38 C39 | -60.3 (12)  |
| C30 C31 C32 C33 | -120.9 (15) |
| C30 C31 C32 C37 | 57.0 (13)   |
| C30 C31 C44 C39 | -54.9 (16)  |
| C30 C31 C44 C43 | 124.3 (15)  |
| C31 C32 C33 C34 | -176.0 (14) |
| C31 C32 C37 C36 | 175.3 (12)  |
| C31 C32 C37 C38 | 2.3 (16)    |
| C32 C31 C44 C39 | 52.0 (15)   |
| C32 C31 C44 C43 | -128.7 (14) |
| C32 C33 C34 C35 | -5 (2)      |
| C32 C37 C38 C29 | -61.1 (14)  |
| C32 C37 C38 C39 | 51.9 (16)   |
| C33 C32 C37 C36 | -7 (2)      |
| C33 C32 C37 C38 | -179.8 (14) |
| C33 C34 C35 C36 | 5 (3)       |
| C34 C35 C36 C37 | -6 (3)      |
| C35 C36 C37 C32 | 6 (2)       |
| C35 C36 C37 C38 | 178.1 (15)  |
| C36 C37 C38 C29 | 126.8 (15)  |
| C36 C37 C38 C39 | -120.2 (16) |
| C37 C32 C33 C34 | 6 (2)       |
| C37 C38 C39 C40 | 121.6 (16)  |
| C37 C38 C39 C44 | -53.2 (17)  |
| C38 C29 C30 C21 | 179.7 (11)  |
| C38 C29 C30 C31 | 3.5 (14)    |



## Electronic Supplementary Information

|                 |             |
|-----------------|-------------|
| C38 C39 C40 C41 | -179.1 (16) |
| C38 C39 C44 C31 | -3.0 (18)   |
| C38 C39 C44 C43 | 177.7 (13)  |
| C39 C40 C41 C42 | 8 (3)       |
| C40 C39 C44 C31 | -178.2 (12) |
| C40 C39 C44 C43 | 2 (2)       |
| C40 C41 C42 C43 | -9 (3)      |
| C41 C42 C43 C44 | 7 (2)       |
| C42 C43 C44 C31 | 177.0 (13)  |
| C42 C43 C44 C39 | -4 (2)      |
| C44 C31 C32 C33 | 130.6 (15)  |
| C44 C31 C32 C37 | -51.5 (13)  |
| C44 C39 C40 C41 | -5 (2)      |
| C1S C2S C3S C4S | -2 (2)      |
| C2S C1S C6S C5S | 4 (2)       |
| C2S C1S C6S C7S | 179.1 (19)  |
| C2S C3S C4S C5S | 0.4 (18)    |
| C2S C3S C4S C9S | -177.0 (12) |
| C3S C4S C5S C6S | 3.3 (17)    |
| C4S C5S C6S C1S | -5.8 (19)   |
| C4S C5S C6S C7S | 179.6 (14)  |
| C6S C1S C2S C3S | 0 (2)       |
| C6S C1S C2S C8S | -179.5 (10) |
| C8S C2S C3S C4S | 177.3 (12)  |
| C9S C4S C5S C6S | -179.5 (11) |

**Table S10. Hydrogen Atom Coordinates ( $\text{\AA}\times 10^4$ ) and Isotropic Displacement Parameters ( $\text{\AA}^2\times 10^3$ ).**

| Atom | <i>x</i> | <i>y</i> | <i>z</i> | U(eq) |
|------|----------|----------|----------|-------|
| H3   | 5000     | 10470    | 3252     | 45    |
| H4   | 3066     | 10929    | 1981     | 57    |
| H5   | 3264     | 8851     | 1244     | 67    |
| H6   | 5419     | 6075     | 1904     | 60    |
| H7   | 8046     | 3911     | 3281     | 57    |
| H9   | 11383    | 3312     | 2925     | 71    |
| H10  | 13655    | 4162     | 3015     | 77    |
| H11  | 13381    | 6135     | 3839     | 100   |
| H12  | 10695    | 7770     | 4356     | 61    |
| H14  | 7434     | 8226     | 4535     | 51    |
| H19  | 6252     | 1123     | 6282     | 46    |
| H20  | 5973     | 784      | 7849     | 41    |
| H25  | 7054     | 8036     | 6044     | 68    |
| H26  | 6015     | 8177     | 7475     | 52    |
| H31  | 5330     | 677      | 9286     | 36    |

## Electronic Supplementary Information

|      |       |       |       |     |
|------|-------|-------|-------|-----|
| H33  | 8096  | -1378 | 10542 | 59  |
| H34  | 9811  | -2006 | 11953 | 71  |
| H35  | 9496  | 259   | 12534 | 65  |
| H36  | 7241  | 2963  | 11926 | 56  |
| H38  | 4823  | 4959  | 10624 | 42  |
| H40  | 1591  | 5618  | 10876 | 77  |
| H41  | -874  | 5178  | 10588 | 91  |
| H42  | -540  | 2830  | 10111 | 80  |
| H43  | 2050  | 1428  | 9476  | 72  |
| H1S  | 11708 | -1926 | 6340  | 148 |
| H3S  | 12157 | 2510  | 5629  | 126 |
| H5S  | 10380 | 1255  | 8116  | 127 |
| H7SA | 10301 | -1516 | 8586  | 287 |
| H7SB | 11686 | -2932 | 8157  | 287 |
| H7SC | 9706  | -1955 | 7704  | 287 |
| H8SA | 12740 | 751   | 4577  | 129 |
| H8SB | 11590 | -253  | 4658  | 129 |
| H8SC | 13580 | -1189 | 5094  | 129 |
| H9SA | 11411 | 4460  | 6589  | 184 |

**Table S11. Crystal data and structure refinement for  $3 \cdot \text{C}_6\text{H}_3(\text{CH}_3)_3$**

|                                                                    |                                         |
|--------------------------------------------------------------------|-----------------------------------------|
| $\text{C}_{44} \text{H}_{24} \text{Br}_2, \text{C}_9\text{H}_{12}$ | $\text{C}_{53} \text{H}_{36} \text{Br}$ |
| Chemical_formula_sum                                               |                                         |
| Chemical_formula_weight                                            | 832.64                                  |
| Chemical_absolute_configuration                                    | unk                                     |
| Space_group_crystal_system                                         | triclinic                               |
| Space_group_IT_number                                              | 1                                       |
| Space_group_name                                                   | P 1                                     |
| Space_group_symop_operation_xyz                                    | 1 'x, y, z'                             |
| Cell_length_a                                                      | 8.3886(7)                               |
| Cell_length_b                                                      | 9.0069(8)                               |
| Cell_length_c                                                      | 14.5283(13)                             |
| Cell_angle_alpha                                                   | 76.634(8)                               |
| Cell_angle_beta                                                    | 89.729(7)                               |

## Electronic Supplementary Information

|                                             |              |
|---------------------------------------------|--------------|
| Cell_angle_gamma                            | 64.661(8)    |
| Cell_volume                                 | 959.66(14)   |
| Cell_formula_units_Z                        | 1            |
| Cell_measurement_reflns_used                | 2053         |
| Cell_measurement_temperature                | 295(2)       |
| Cell_measurement_theta_max                  | 25.6900      |
| Cell_measurement_theta_min                  | 2.5810       |
| Exptl_absorpt_coefficient_mu                | 2.150        |
| Exptl_absorpt_correction_T_max              | 1.00000      |
| Exptl_absorpt_correction_T_min              | 0.74231      |
| Exptl_absorpt_correction_type               | multi-scan   |
| Exptl_crystal_colour                        | light yellow |
| Exptl_crystal_colour_modifier               | light        |
| Exptl_crystal_colour_primary                | yellow       |
| Exptl_crystal_density_diffn                 | 1.441        |
| Exptl_crystal_description                   | prism        |
| Exptl_crystal_F_000                         | 424          |
| Crystallisation from 2,4,6-trimethylbenzene |              |
| Exptl_crystal_size_max                      | 0.25         |
| Exptl_crystal_size_mid                      | 0.2          |
| Exptl_crystal_size_min                      | 0.15         |

## Electronic Supplementary Information

**Table S12. Crystal data and structure refinement for 3• C<sub>6</sub>H<sub>3</sub>(CH<sub>3</sub>)<sub>3</sub>**

|                                    |                                                                                                                                                                   |                    |
|------------------------------------|-------------------------------------------------------------------------------------------------------------------------------------------------------------------|--------------------|
| Bond precision:                    | C-C = 0.0207 Å                                                                                                                                                    | Wavelength=0.71070 |
| Cell:                              | a=8.3886(7) b=9.0069(8) c=14.5283(13)                                                                                                                             |                    |
|                                    | alpha=76.634(8) beta=89.729(7) gamma=64.661(8)                                                                                                                    |                    |
| Temperature:                       | 295 K                                                                                                                                                             |                    |
| Calculated                         | Reported                                                                                                                                                          |                    |
| Volume                             | 959.66(17) 959.66(14)                                                                                                                                             |                    |
| Space group                        | P 1 P 1                                                                                                                                                           |                    |
| Hall group                         | P 1 P 1                                                                                                                                                           |                    |
| Moiety formula                     | C <sub>44</sub> H <sub>24</sub> Br <sub>2</sub> , C <sub>9</sub> H <sub>12</sub> C <sub>44</sub> H <sub>24</sub> Br <sub>2</sub> , C <sub>9</sub> H <sub>12</sub> |                    |
| Sum formula                        | C <sub>53</sub> H <sub>36</sub> Br <sub>2</sub> C <sub>53</sub> H <sub>36</sub> Br <sub>2</sub>                                                                   |                    |
| Mr                                 | 832.62 832.64                                                                                                                                                     |                    |
| D <sub>x</sub> ,g cm <sup>-3</sup> | 1.441 1.441                                                                                                                                                       |                    |
| Z                                  | 1 1                                                                                                                                                               |                    |
| Mu (mm <sup>-1</sup> )             | 2.150 2.150                                                                                                                                                       |                    |
| F <sub>000</sub>                   | 424.0 424.0                                                                                                                                                       |                    |
| F <sub>000</sub> '                 | 423.57                                                                                                                                                            |                    |
| h,k,l <sub>max</sub>               | 10,11,18 10,11,18                                                                                                                                                 |                    |
| N <sub>ref</sub>                   | 7864[ 3932] 5001                                                                                                                                                  |                    |
| T <sub>min</sub> ,T <sub>max</sub> | 0.603,0.724 0.742,1.000                                                                                                                                           |                    |
| T <sub>min</sub> '                 | 0.578                                                                                                                                                             |                    |
| Correction method=                 | # Reported T Limits: T <sub>min</sub> =0.742 T <sub>max</sub> =1.000 AbsCorr = MULTI-SCAN                                                                         |                    |
| Data completeness=                 | 1.27/0.64 Theta(max)= 26.370                                                                                                                                      |                    |
| R(reflections)=                    | 0.0509( 3714) wR <sub>2</sub> (reflections)= 0.1536( 5001)                                                                                                        |                    |
| S =                                | 1.006 N <sub>par</sub> = 497                                                                                                                                      |                    |

CrysAlisPro, Agilent Technologies, Version 1.171.36.32 (release 02-08-2013 CrysAlis171 .NET)  
(compiled Aug 2 2013,16:46:58)

## References

---

- 1 Clark, R. C.; Reid, J. S. *Acta Cryst.* **1995**, *A51*, 887-897
- 2 O. V. Dolomanov, L. J. Bourhis, R. J. Gildea, J. A. K. Howard and H. Puschmann, OLEX2: a complete structure solution, refinement and analysis program. *J. Appl. Cryst.* (2009). 42, 339-341.
- 3 olex2.solve (L.J. Bourhis, O.V. Dolomanov, R.J. Gildea, J.A.K. Howard, H. Puschmann, in preparation, 2011)
- 4 SHELXL, G.M. Sheldrick, *Acta Cryst.* (2008). A64, 112-122
